# Supplementary material for: Reactive Oxygen Species Rewires Metabolic Activity in Acute Myeloid Leukemia
Source: Front Oncol. 2021 Mar 11;11:632623. doi: 10.3389/fonc.2021.632623 (PMC7993200; doi:10.3389/fonc.2021.632623)
Supplement: Supplementary file 2 [file Table_1.xlsx]

## Sheet: Explanation
	Robinson et al: ROS rewires metabolism in leukemic cell lines
	[Biochemical Name]*		Indicates compounds that have not been officially confirmed based on a standard, but we are confident in its identity.
	Pathway Heat Map		This is the heat map associated with the statistical analysis of the data.
			Indicates ratios, p- and q-values for each comparison.
			0.55	Green: indicates significant difference (p≤0.05) between the groups shown, metabolite ratio of < 1.00
			0.76	Light Green: narrowly missed statistical cutoff for significance 0.05<p<0.10, metabolite ratio of < 1.00
			1.71	Red: indicates significant difference (p≤0.05) between the groups shown; metabolite ratio of ≥ 1.00
			1.32	Light Red: narrowly missed statistical cutoff for significance 0.05<p<0.10, metabolite ratio of ≥ 1.00
			1.2	Non-colored text and cell: mean values are not significantly different for that comparison
	Box Plots (pathway)		Box plots sorted by pathway and biochemical name, as in the example below:
	Box Plots (biochem)

## Sheet: Pathway Heat Map
	Robinson et al: ROS rewires metabolism in leukemic cell lines
											Fold of Change
	Heat map of statistically significant biochemicals profiled in this study.						Data normalization: Bradford protein concentration				Welch's Two-Sample t-Test										Statistical Values
											THP-1 Cell Lines			NOMO Cell Lines			MV411 Cells				Welch's Two-Sample t-Test																			Mean Values
	Pathway Sort Order	Super Pathway	Sub Pathway	Biochemical Name	Platform	Comp ID	KEGG	HMDB	PubChem		NOX2 KD Ctrl	DPI Ctrl	DPI NOX2 KD	NOX2 KD Ctrl	DPI Ctrl	DPI NOX2 KD	GOX 10 Ctrl	GOX 20 Ctrl	GOX 20 GOX 10		THP NOX2 KD / THP Ctrl		THP DPI / THP Ctrl		THP DPI / THP NOX2 KD		NOMO NOX2 KD / NOMO Ctrl		NOMO DPI / NOMO Ctrl		NOMO DPI / NOMO NOX2 KD		MV411 GOX 10 / MV411 Ctrl		MV411 GOX 20 / MV411 Ctrl		MV411 GOX 20 / MV411 GOX 10			THP Ctrl	THP NOX2 KD	THP DPI	NOMO Ctrl	NOMO NOX2 KD	NOMO DPI	MV411 Ctrl	MV411 GOX 10	MV411 GOX 20
																				X	p-value	q-value	p-value	q-value	p-value	q-value	p-value	q-value	p-value	q-value	p-value	q-value	p-value	q-value	p-value	q-value	p-value	q-value	X										X
	1	Amino Acid	Glycine, Serine and Threonine Metabolism	glycine	LC/MS pos early	58	C00037	HMDB00123	750		0.75	1.31	1.76	1.02	0.84	0.82	1.11	0.85	0.76		0.0154	0.0194	0.0154	0.0084	0.0012	0.0006	0.6745	0.3318	0.0305	0.0117	0.0249	0.0039	0.2027	0.1847	0.0677	0.0606	0.0031	0.0226		1.0099	0.7546	1.3252	1.027	1.0519	0.8641	1.0374	1.1504	0.878
	2			N-acetylglycine	LC/MS pos early	27710		HMDB00532	10972		1.21	0.81	0.67	1.14	0.78	0.69	1.1	1	0.91		0.0883	0.057	0.2412	0.076	0.0643	0.0125	0.1965	0.18	0.0291	0.0114	0.0068	0.0014	0.5282	0.3438	0.9685	0.3751	0.5548	0.2413		0.564	0.682	0.4574	1.0441	1.1865	0.8195	1.2788	1.4121	1.2851
	4			sarcosine (N-Methylglycine)	LC/MS pos early	1516	C00213	HMDB00271	1088		1.11	1.01	0.91	0.91	0.66	0.72	2.01	1.79	0.89		0.4566	0.1854	0.8042	0.1894	0.3928	0.051	0.46	0.2733	0.0139	0.0063	0.0055	0.0012	0.0595	0.0843	0.0074	0.0164	0.7947	0.3027		1.1607	1.2857	1.1745	1.1391	1.0343	0.7476	0.2897	0.5822	0.519
	5			dimethylglycine	LC/MS pos early	5086	C01026	HMDB00092	673		0.92	1.5	1.63	1	1.01	1.01	1.18	0.83	0.7		0.5218	0.1993	0.014	0.0077	0.0021	0.0009	0.9613	0.4016	0.9908	0.2246	0.9787	0.0923	0.085	0.1063	0.1112	0.0843	0.0122	0.0293		0.95	0.8703	1.4222	0.8559	0.8526	0.861	1.2313	1.4589	1.0209
	6			betaine	LC/MS pos early	3141	C00719	HMDB00043	247		0.68	1.11	1.63	0.99	0.76	0.77	1.12	0.85	0.76		0.0059	0.0114	0.1808	0.0619	0.0045	0.0016	0.9006	0.3902	0.0289	0.0113	0.0298	0.0045	0.1766	0.1681	0.1277	0.0927	0.014	0.0312		1.2753	0.8682	1.4176	1.2623	1.2453	0.9545	0.7563	0.8479	0.6442
	7			betaine aldehyde	LC/MS pos early	15499	C00576	HMDB01252	249		1.05	7.26	6.9	0.31	11.68	37.25	1.57	1.19	0.75		0.6424	0.2256	5.4233e-06	5.3548e-05	0.0388	0.0085	0.0598	0.097	0.0026	0.0019	0.0001	0.0002	0.1662	0.1625	0.1835	0.119	0.3786	0.1876		0.9368	0.9865	6.8028	0.2887	0.0905	3.3714	0.0905	0.1424	0.1073
	9			serine	LC/MS pos early	1648	C00065	HMDB00187	5951		0.78	0.37	0.47	1.19	0.63	0.53	1.09	0.72	0.66		0.0243	0.0253	2.5439e-05	0.0001	9.0984e-05	0.0002	0.0241	0.0551	0.0045	0.0027	0.0015	0.0005	0.2509	0.2134	0.0069	0.0158	0.0011	0.0141		1.0167	0.7972	0.3769	0.9532	1.1333	0.6004	1.515	1.6555	1.0962
	10			N-acetylserine	LC/MS pos early	37076		HMDB02931	65249		0.74	0.95	1.29	0.89	1.03	1.15	1.28	1.26	0.99		0.0158	0.0195	0.6039	0.1536	0.002	0.0009	0.2671	0.2082	0.6883	0.1672	0.0506	0.007	0.0177	0.041	0.0495	0.049	0.8835	0.3239		0.6977	0.514	0.6642	1.4474	1.2938	1.4923	0.8604	1.0995	1.0873
	14			threonine	LC/MS pos early	1284	C00188	HMDB00167	6288		0.77	0.83	1.08	1.1	0.51	0.47	1.28	1	0.78		0.0636	0.046	0.1314	0.0482	0.3714	0.0494	0.0706	0.1044	0.0025	0.0019	0.0012	0.0004	0.0258	0.0519	0.9953	0.3791	0.011	0.0293		0.8326	0.6395	0.6894	0.9954	1.0943	0.5096	1.6519	2.1189	1.6451
	15			N-acetylthreonine	LC/MS neg	33939			152204		0.76	1.07	1.4	0.77	0.82	1.06	0.93	0.86	0.93		0.0539	0.0423	0.6992	0.1715	0.0558	0.0112	0.1093	0.1343	0.1813	0.0543	0.602	0.0599	0.0974	0.1161	0.1028	0.0806	0.3411	0.1753		0.7052	0.5385	0.7523	1.4762	1.1439	1.2165	1.0542	0.9791	0.9093
	20			homoserine lactone	LC/MS pos early	15696	C02926		445963		0.74	1.25	1.68	1.03	0.3	0.29	1.25	1.01	0.81		0.1308	0.0749	0.1985	0.0657	0.0142	0.0038	0.8194	0.3622	0.0009	0.0011	0.0001	0.0002	0.1469	0.1505	0.8613	0.3483	0.1019	0.0869		1.0267	0.7626	1.2817	1.0789	1.1059	0.3229	0.9638	1.2087	0.976
	25		Alanine and Aspartate Metabolism	alanine	LC/MS pos early	1126	C00041	HMDB00161	5950		0.75	0.57	0.76	1.19	0.43	0.36	0.98	0.73	0.75		0.0302	0.0291	0.004	0.003	0.0362	0.008	0.1121	0.1344	0.0008	0.0011	0.0003	0.0003	0.7814	0.4179	0.0041	0.0117	0.0088	0.0289		1.2119	0.9044	0.6903	1.02	1.2099	0.4414	1.2048	1.1823	0.8817
	26			N-acetylalanine	LC/MS neg	1585	C02847	HMDB00766	88064		0.73	0.52	0.72	0.97	0.66	0.68	1.12	0.81	0.72		0.08	0.0534	0.0083	0.0053	0.0018	0.0008	0.7588	0.3487	0.0113	0.0054	0.0061	0.0013	0.0397	0.0667	0.279	0.1621	0.1575	0.1093		0.6916	0.5021	0.3596	1.1601	1.1208	0.7626	1.1552	1.2911	0.9316
	28			aspartate	LC/MS pos early	443	C00049	HMDB00191	5960		1.38	0.54	0.39	0.77	0.41	0.53	0.84	0.64	0.77		0.0049	0.0107	0.0002	0.0003	1.2089e-05	4.3227e-05	0.0267	0.0581	0.0002	0.0006	0.0012	0.0005	0.0651	0.0883	0.0026	0.0095	0.0157	0.033		0.6953	0.96	0.3781	2.0483	1.5854	0.8462	1.2769	1.0692	0.822
	30			asparagine	LC/MS pos early	512	C00152	HMDB00168	6267		0.67	0.64	0.97	1.25	0.48	0.38	1.13	0.86	0.76		0.0144	0.0186	0.0119	0.0069	0.7944	0.0906	0.0038	0.0243	0.0029	0.0021	0.0008	0.0004	0.181	0.1704	0.1221	0.0902	0.0063	0.024		1.6211	1.0799	1.0455	1.5016	1.8778	0.7148	0.6221	0.7059	0.5355
	31			N-acetylasparagine	LC/MS pos early	33942		HMDB06028	99715		0.7	1.02	1.46	1.01	0.58	0.57	1.34	1.39	1.04		0.0244	0.0253	0.6877	0.1698	0.0239	0.006	0.8964	0.3899	0.0026	0.0019	0.0041	0.001	0.0629	0.0868	0.0213	0.0296	0.7338	0.2901		1.2651	0.8899	1.296	1.3074	1.3146	0.7534	0.6111	0.8165	0.8516
	32			N-acetylaspartate (NAA)	LC/MS polar	22185	C01042	HMDB00812	65065		0.69	0.86	1.24	0.87	0.78	0.89	1.1	0.96	0.87		0.0029	0.0079	0.0452	0.0203	0.0241	0.006	0.0795	0.1119	0.0138	0.0062	0.1308	0.0163	0.3754	0.2752	0.6105	0.2736	0.2029	0.1262		0.9536	0.6584	0.8158	1.1554	1.0033	0.8973	1.1655	1.2838	1.1175
	34			N-methylalanine	LC/MS pos early	37069	C02721	HMDB01906	5288725;6971259		0.71	1.19	1.68	1.13	1.05	0.93	0.94	0.7	0.75		0.2617	0.1227	0.2916	0.0893	0.1032	0.018	0.3291	0.2298	0.8826	0.206	0.6028	0.0599	0.6304	0.3749	0.1566	0.1074	0.3305	0.1726		0.9768	0.6956	1.1669	1.23	1.391	1.2894	0.8672	0.8117	0.6074
	39		Glutamate Metabolism	glutamate	LC/MS pos early	57	C00025	HMDB00148	611		0.75	0.95	1.26	0.95	0.9	0.95	1.06	0.82	0.77		0.0327	0.0311	0.5906	0.1515	0.0367	0.0081	0.3284	0.2298	0.1088	0.0346	0.3207	0.0351	0.5718	0.3567	0.0709	0.0624	0.0185	0.0358		1.0261	0.7682	0.9707	1.3096	1.2407	1.1795	0.9548	1.0077	0.7807
	40			glutamine	LC/MS pos early	53	C00064	HMDB00641	5961		0.16	1.64	10.5	1.27	0.42	0.33	1.14	0.73	0.64		0.0004	0.005	0.0487	0.0214	2.6548e-06	2.0642e-05	0.0624	0.0982	0.0046	0.0028	0.0007	0.0003	0.1078	0.1236	0.0106	0.0207	0.0001	0.0105		1.4881	0.2319	2.4356	2.8583	3.6329	1.1944	0.7096	0.8104	0.5175
	41			N-acetylglutamate	LC/MS pos early	15720	C00624	HMDB01138	70914		0.87	0.77	0.88	0.7	0.56	0.8	2.42	2.47	1.02		0.4445	0.1828	0.1415	0.051	0.4768	0.0597	0.036	0.0711	0.0042	0.0026	0.1477	0.0181	0.0003	0.0064	0.001	0.0057	0.7398	0.2913		1.1273	0.9846	0.8645	1.1277	0.7914	0.6352	0.8874	2.1484	2.1951
	42			N-acetylglutamine	LC/MS pos early	33943	C02716	HMDB06029	182230		0.75	1.4	1.87	0.89	0.8	0.9	1.29	1.21	0.94		0.0164	0.0195	0.0085	0.0054	7.9901e-05	0.0002	0.1847	0.1732	0.0384	0.0141	0.1379	0.0171	0.0598	0.0843	0.1461	0.1012	0.6427	0.2664		1.0032	0.75	1.4017	1.9296	1.7136	1.5384	0.6755	0.8681	0.8189
	43			N-acetyl-aspartyl-glutamate (NAAG)	LC/MS pos early	35665	C12270	HMDB01067	5255		0.67	1.32	1.98	0.77	1.71	2.22	0.97	0.93	0.95		0.0126	0.0168	0.0124	0.0071	0.0014	0.0007	0.0633	0.0982	0.0038	0.0025	3.194e-05	7.5437e-05	0.8597	0.4431	0.6025	0.2712	0.6941	0.2792		1.4943	1.0002	1.979	0.8294	0.6395	1.4199	0.9287	0.9008	0.8594
	44			gamma-aminobutyrate (GABA)	LC/MS pos early	1416	C00334	HMDB00112	119		0.92	1.27	1.37	0.8	1.07	1.34	0.96	0.7	0.72		0.7896	0.2563	0.233	0.0742	0.0658	0.0127	0.0049	0.0268	0.4638	0.1172	0.0129	0.0023	0.6863	0.3905	0.0072	0.016	0.0007	0.0135		0.2103	0.1943	0.2669	1.0648	0.8469	1.1346	1.6104	1.5527	1.1195
	45			carboxyethyl-GABA	LC/MS pos early	40007		HMDB02201	2572		0.93	1.09	1.18	0.97	0.8	0.82	0.7	0.43	0.61		0.5745	0.2109	0.4737	0.1279	0.1531	0.0243	0.5812	0.3074	0.0416	0.0151	0.0612	0.0083	0.0236	0.0488	0.0014	0.0066	0.0007	0.0135		0.7348	0.6811	0.801	1.0852	1.0544	0.8656	3.1292	2.2042	1.3491
	47			4-hydroxyglutamate	LC/MS pos early	40499	C03079	HMDB01344	439902		0.92	1.39	1.52	0.91	1.08	1.19	1.14	1.09	0.96		0.4938	0.1931	0.0093	0.0057	0.0397	0.0087	0.2225	0.1898	0.2117	0.0618	0.0493	0.0069	0.4839	0.3249	0.4922	0.233	0.8606	0.3188		0.9311	0.8522	1.2955	1.5612	1.4137	1.6785	0.5705	0.6499	0.6225
	50			glutamate, gamma-methyl ester	LC/MS pos early	33487			68662		0.61	1.13	1.86	0.75	0.49	0.65	1.1	0.87	0.79		0.1179	0.0694	0.7932	0.1872	0.1192	0.0203	0.0447	0.0816	0.0272	0.0109	0.0889	0.0116	0.64	0.3797	0.9494	0.3698	0.421	0.1999		1.1112	0.6767	1.2609	1.7085	1.2852	0.8403	0.9029	0.9951	0.7865
	51			pyroglutamine*	LC/MS pos early	46225			134508		0.71	1.07	1.51	0.95	0.64	0.67	1.11	0.96	0.87		0.0584	0.0437	0.4723	0.1278	0.0226	0.0057	0.5766	0.3074	0.0009	0.0011	0.0197	0.0032	0.3798	0.2769	0.7256	0.3068	0.1869	0.1194		0.8772	0.6231	0.941	1.6788	1.59	1.0661	0.9707	1.0777	0.9325
	54			gamma-carboxyglutamate	LC/MS pos early	38754		HMDB41900	40772		0.88	1.3	1.47	1.13	1.04	0.92	0.76	0.72	0.95		0.3511	0.1534	0.0615	0.0256	0.0084	0.0025	0.1367	0.1479	0.5791	0.1427	0.1043	0.0133	0.2571	0.2172	0.0511	0.0498	0.9668	0.3456		1.0898	0.9577	1.4125	0.3243	0.3655	0.3363	1.4445	1.0935	1.0419
	55			S-1-pyrroline-5-carboxylate	LC/MS pos early	42370	C04322	HMDB01301	1196		0.95	1.03	1.09	0.88	0.6	0.68	1.55	1.36	0.88		0.9489	0.2929	0.7003	0.1715	0.4797	0.0599	0.5051	0.2868	0.0043	0.0026	0.8314	0.0794	0.2193	0.1963	0.2958	0.1657	0.2629	0.1464		1.0821	1.0262	1.1155	1.2531	1.1002	0.7466	0.6748	1.0435	0.9165
	56		Histidine Metabolism	histidine	LC/MS pos early	59	C00135	HMDB00177	6274		0.81	0.74	0.91	1.16	0.72	0.62	1.28	0.97	0.75		0.0893	0.0572	0.024	0.0122	0.4051	0.0518	0.0586	0.0966	0.0089	0.0045	0.0034	0.0009	0.0183	0.0416	0.6957	0.2972	0.0019	0.017		0.6516	0.5301	0.4832	1.1525	1.3325	0.8304	1.0687	1.3731	1.0341
	57			N-acetylhistidine	LC/MS pos early	33946	C02997	HMDB32055	75619		0.75	1.31	1.74	0.88	1.02	1.15	1.12	1	0.9		0.0571	0.0431	0.0567	0.0243	0.0005	0.0004	0.3798	0.2503	0.7864	0.1876	0.0567	0.0078	0.3176	0.2455	0.9367	0.3668	0.2831	0.1554		1.0344	0.7786	1.3509	0.8377	0.7404	0.8547	3.0078	3.3674	3.0206
	58			1-methylhistidine	LC/MS pos early	30460	C01152	HMDB00001	92105		0.95	1.17	1.23	1.36	0.77	0.56	2.36	2.24	0.95		0.8538	0.2703	0.3971	0.111	0.2087	0.0309	0.007	0.0303	0.0321	0.0123	0.0028	0.0008	0.0018	0.0122	0.004	0.0117	0.7801	0.3002		0.9706	0.9222	1.1327	3.087	4.207	2.3739	0.3616	0.852	0.8108
	59			3-methylhistidine	LC/MS pos early	15677	C01152	HMDB00479	64969		1.03	1.59	1.53	1.3	0.75	0.58	2.05	1.69	0.82		0.7521	0.2514	0.1084	0.0414	0.1244	0.0208	0.104	0.1315	0.1259	0.0393	0.0133	0.0024	0.0053	0.0234	0.0152	0.0246	0.0377	0.0527		0.8782	0.9075	1.3924	2.4246	3.1527	1.8254	0.4198	0.8606	0.7093
	67			imidazole propionate	LC/MS pos early	40730		HMDB02271	70630		0.91	1.75	1.92	1.32	1.13	0.86	1.58	1.57	0.99		0.5189	0.1991	0.0037	0.0028	0.0032	0.0012	0.1336	0.1475	0.1983	0.0586	0.3942	0.0414	0.0109	0.0337	0.0042	0.012	0.9845	0.3479		0.9976	0.9068	1.742	1.2605	1.6633	1.4281	0.3974	0.6297	0.6234
	68			imidazole lactate	LC/MS pos early	15716	C05568	HMDB02320	440129		0.97	1.91	1.97	1.01	1.02	1.02	2.2	2.75	1.25		0.9195	0.2857	0.0088	0.0055	0.001	0.0006	0.9526	0.4	0.7294	0.1758	0.7995	0.0767	0.0092	0.0314	0.0031	0.0104	0.0954	0.0836		0.9516	0.9225	1.8162	0.9377	0.9456	0.961	0.498	1.0944	1.3686
	74			1-methylimidazoleacetate	LC/MS pos early	32350	C05828	HMDB02820	75810		1.03	2.01	1.96	1.04	1.35	1.3	1.22	1.02	0.83		0.7874	0.2563	0.0009	0.001	0.0005	0.0004	0.4842	0.2803	0.0064	0.0036	0.0097	0.0019	0.0585	0.0841	0.8326	0.3413	0.08	0.0758		0.8991	0.922	1.8072	1.12	1.1615	1.5134	0.6017	0.7361	0.6116
	75			4-imidazoleacetate	LC/MS pos early	32349	C02835	HMDB02024	96215		1.15	1.71	1.49	1.15	1.65	1.44	1.24	1.29	1.03		0.5037	0.1947	0.1293	0.048	0.1362	0.0223	0.2388	0.1978	0.0027	0.002	0.0198	0.0032	0.0544	0.0838	0.0574	0.0538	0.7931	0.3027		0.4386	0.5051	0.7505	1.601	1.8436	2.6494	0.8657	1.0765	1.1127
	78		Lysine Metabolism	lysine	LC/MS pos early	1301	C00047	HMDB00182	5962		0.86	0.84	0.98	0.91	0.63	0.7	1.15	0.89	0.77		0.1927	0.0987	0.0609	0.0254	0.9027	0.1016	0.1516	0.1538	0.0004	0.0008	0.0009	0.0004	0.2335	0.2047	0.2403	0.1473	0.0402	0.0532		0.7166	0.615	0.6017	1.141	1.0408	0.7239	1.2449	1.4358	1.1081
	80			N6-acetyllysine	LC/MS pos early	36752	C02727	HMDB00206	92832		0.54	0.56	1.04	0.76	0.4	0.52	1.43	1.22	0.85		0.0369	0.0336	0.0013	0.0013	0.7048	0.0822	0.0166	0.0447	4.1056e-05	0.0003	7.4023e-05	0.0001	0.0123	0.0352	0.0598	0.0555	0.1157	0.0907		0.7527	0.4079	0.4228	2.0047	1.5277	0.7919	0.9496	1.3548	1.1576
	82			N6,N6,N6-trimethyllysine	LC/MS pos early	1498	C03793	HMDB01325	440120		0.79	0.88	1.11	0.85	0.59	0.7	1.29	1.11	0.86		0.0477	0.0393	0.1999	0.0657	0.206	0.0306	0.0965	0.1263	0.0011	0.0012	0.0013	0.0005	0.0551	0.0838	0.2817	0.1626	0.1039	0.0873		1.0992	0.8733	0.9727	1.1763	1.001	0.6994	0.9732	1.2574	1.0842
	83			5-hydroxylysine	LC/MS pos early	15685	C16741	HMDB00450	1029		0.84	1.76	2.09	1.06	0.66	0.63	1.43	0.94	0.66		0.2791	0.129	0.0097	0.0059	0.0006	0.0004	0.6198	0.3179	0.0375	0.0139	0.0012	0.0004	0.1145	0.1286	0.8929	0.3538	0.0105	0.0293		0.8442	0.7118	1.4883	1.2474	1.3198	0.8253	0.8699	1.2398	0.8168
	85			2-aminoadipate	LC/MS pos early	6146	C00956	HMDB00510	469		0.83	0.99	1.18	0.77	0.87	1.13	1.45	1.43	0.98		0.2954	0.1342	0.9953	0.2229	0.2195	0.0321	0.0138	0.0411	0.1176	0.0369	0.1373	0.017	0.0324	0.0595	0.0165	0.0254	0.9512	0.342		1.0865	0.9071	1.071	1.4409	1.1105	1.2512	0.6408	0.9323	0.9162
	88			glutarate (pentanedioate)	LC/MS polar	396	C00489	HMDB00661	743		1.13	1.97	1.75	0.96	1.33	1.39	0.97	0.7	0.72		0.349	0.1529	0.0009	0.001	0.0045	0.0016	0.7189	0.339	0.0333	0.0126	0.096	0.0124	0.7352	0.406	0.0038	0.0116	0.0002	0.0105		0.5662	0.6376	1.1141	0.7822	0.7501	1.0423	1.9377	1.888	1.3583
	96			pipecolate	LC/MS pos early	1444	C00408	HMDB00070	849		0.79	0.82	1.04	1.14	0.76	0.67	1.39	1.14	0.82		0.0769	0.0518	0.1079	0.0414	0.6085	0.0724	0.0684	0.1027	0.0134	0.0061	0.0034	0.0009	0.013	0.0352	0.1636	0.1108	0.0387	0.0528		1.13	0.8921	0.9268	1.5176	1.7346	1.158	0.7361	1.0241	0.8392
	97			cadaverine	LC/MS pos early	15308	C01672	HMDB02322	273		1	1	1	1	1	1	1.65	1.39	0.84		---	---	---	---	---	---	---	---	---	---	---	---	0.0547	0.0838	0.1064	0.0822	0.3819	0.188		0.5059	0.5059	0.5059	0.5059	0.5059	0.5059	0.7536	1.2451	1.0507
	99			5-aminovalerate	LC/MS pos early	18319	C00431	HMDB03355	138		0.87	1.16	1.34	0.89	1.02	1.14	0.99	0.69	0.7		0.1678	0.0888	0.1524	0.0536	0.0097	0.0028	0.1942	0.18	0.8718	0.2039	0.2182	0.025	0.8886	0.4518	0.0026	0.0095	0.0024	0.0192		0.5373	0.4679	0.625	1.0242	0.9149	1.0444	7.187	7.1031	4.9599
	101			N6-carboxyethyllysine	LC/MS pos early	37458					1.09	2.53	2.32	0.41	1.34	3.24	2.32	4	1.73		0.6551	0.229	0.0087	0.0055	0.0089	0.0026	0.2148	0.1876	0.3814	0.0987	0.0213	0.0034	0.1839	0.1725	0.0001	0.0021	0.1412	0.1009		0.281	0.3069	0.7117	1.3196	0.5465	1.7726	0.2632	0.6097	1.0524
	105			6-oxopiperidine-2-carboxylic acid	LC/MS pos early	43231			3014237		0.78	0.72	0.93	1.19	1.1	0.92	1.65	1.6	0.97		0.4582	0.1856	0.31	0.0936	0.535	0.066	0.5609	0.3042	0.9424	0.217	0.6855	0.0675	0.1227	0.1338	0.0952	0.0767	0.9723	0.3459		0.8325	0.6485	0.5999	0.8831	1.0504	0.9688	0.7839	1.2928	1.2513
	106		Phenylalanine and Tyrosine Metabolism	phenylalanine	LC/MS pos early	64	C00079	HMDB00159	6140		0.79	0.51	0.64	1.06	0.65	0.62	1.18	0.91	0.77		0.0493	0.0402	0.0002	0.0003	0.0038	0.0014	0.418	0.262	0.0028	0.002	0.0021	0.0006	0.0934	0.1125	0.2639	0.1561	0.0087	0.0289		0.7148	0.5673	0.3655	1.0727	1.1332	0.6998	1.2096	1.4249	1.099
	107			N-acetylphenylalanine	LC/MS neg	33950	C03519	HMDB00512	74839		0.82	0.58	0.7	0.69	0.66	0.96	1.23	0.94	0.77		0.318	0.142	0.0814	0.0327	0.3802	0.0502	0.5188	0.2923	0.3587	0.0936	0.6344	0.0626	0.3352	0.2553	0.9691	0.3751	0.1146	0.0904		0.9802	0.8026	0.5645	0.9731	0.6726	0.6442	1.7564	2.1525	1.6583
	111			phenyllactate (PLA)	LC/MS neg	22130	C05607	HMDB00779	3848		1.77	0.75	0.42	0.83	1.52	1.83	2.98	4.23	1.42		0.0449	0.0374	0.3473	0.0998	0.001	0.0006	0.2694	0.2093	0.0298	0.0116	0.0047	0.0011	0.0002	0.0064	6.1314e-05	0.0014	0.0532	0.0607		0.1386	0.2459	0.1036	0.8428	0.7009	1.2846	1.2196	3.6368	5.1589
	117			phenylacetylglycine	LC/MS neg	33945	C05598	HMDB00821	68144		0.83	1.18	1.43	1.13	1.2	1.06	1.47	1.26	0.86		0.0789	0.0529	0.1024	0.0398	0.0067	0.0021	0.1468	0.1506	0.0428	0.0154	0.3727	0.04	0.0146	0.037	0.0684	0.0607	0.1076	0.088		1.6968	1.4038	2.0106	0.8345	0.9433	0.9998	0.6951	1.0243	0.878
	119			tyrosine	LC/MS pos early	1299	C00082	HMDB00158	6057		0.74	0.47	0.63	1.11	0.68	0.61	1.18	0.92	0.78		0.0123	0.0166	0.0001	0.0003	0.0012	0.0006	0.0962	0.1263	0.0021	0.0017	0.0015	0.0005	0.108	0.1236	0.339	0.1843	0.0178	0.035		0.7189	0.5312	0.3362	1.0856	1.2099	0.7328	1.1777	1.3907	1.0846
	128			4-hydroxyphenylpyruvate	LC/MS neg	1669	C01179	HMDB00707	979		1.15	0.84	0.73	1.03	0.72	0.7	1.09	0.92	0.85		0.7579	0.252	0.391	0.1098	0.391	0.0509	0.7374	0.3429	0.0823	0.0271	0.0007	0.0004	0.8112	0.4285	0.7599	0.3183	0.6049	0.256		0.1123	0.1293	0.0946	7.2989	7.4978	5.2785	0.7407	0.807	0.6837
	130			3-(4-hydroxyphenyl)lactate	LC/MS neg	32197	C03672	HMDB00755	9378		0.88	0.91	1.03	0.99	0.84	0.85	1.49	1.55	1.04		0.3554	0.1549	0.485	0.1298	0.6001	0.0715	0.9993	0.4124	0.2265	0.0652	0.1303	0.0163	0.0068	0.0269	0.0049	0.0128	0.6755	0.2734		0.3854	0.3386	0.3492	1.1183	1.1091	0.9374	1.0255	1.531	1.5853
	135			phenol sulfate	LC/MS neg	32553	C02180	HMDB60015	74426		0.41	0.63	1.53	0.65	0.68	1.05	0.97	0.65	0.67		0.0002	0.005	0.0037	0.0028	0.0078	0.0024	0.0253	0.0574	0.0428	0.0154	0.741	0.0721	0.7411	0.4068	0.0254	0.0327	0.2017	0.1259		1.3573	0.5595	0.8581	1.3695	0.8916	0.9373	1.3708	1.3285	0.8952
	138			p-cresol sulfate	LC/MS neg	36103	C01468	HMDB11635	4615423		0.75	1.05	1.4	0.98	1.13	1.15	1.09	0.87	0.79		0.1379	0.0772	0.5483	0.1425	0.1005	0.0178	0.9503	0.4	0.3526	0.0929	0.1776	0.0214	0.5137	0.3395	0.283	0.1626	0.0882	0.0795		1.0473	0.7859	1.0996	0.7697	0.7536	0.8673	1.64	1.795	1.4252
	172			O-methyltyrosine	LC/MS pos early	37451			76957		0.96	0.85	0.88	1.24	1.23	0.99	1.22	1	0.82		0.7326	0.2475	0.2006	0.0657	0.5068	0.0628	0.1544	0.154	0.0354	0.0133	0.9864	0.0928	0.2252	0.2006	0.9293	0.3646	0.1647	0.1122		1.0964	1.0519	0.9296	0.3583	0.4457	0.4395	2.01	2.4455	2.0059
	189			thyroxine	LC/MS neg	2761	C01829	HMDB01918	5819		1.63	2.44	1.49	1.16	3	2.59	1	1	1		0.2026	0.1031	0.0265	0.0134	0.1496	0.0239	0.7266	0.3405	0.001	0.0012	0.0161	0.0028	---	---	---	---	---	---		0.6093	0.9944	1.4841	0.7876	0.9147	2.3645	0.3063	0.3063	0.3063
	209		Tryptophan Metabolism	tryptophan	LC/MS pos early	54	C00078	HMDB00929	6305		0.8	0.63	0.79	1.12	0.7	0.63	1.23	1.03	0.84		0.061	0.0448	0.0028	0.0023	0.0609	0.0119	0.1127	0.1344	0.0109	0.0052	0.0066	0.0014	0.0274	0.0538	0.6522	0.2872	0.0254	0.0422		0.596	0.4772	0.3765	1.0437	1.1717	0.7349	1.2647	1.5526	1.2973
	213			indolelactate	LC/MS pos early	18349	C02043	HMDB00671	92904		1.13	1	0.89	0.82	1.81	2.21	2.21	2.9	1.31		0.2279	0.111	---	---	0.2279	0.033	0.1012	0.1291	0.0091	0.0046	0.0023	0.0007	0.0019	0.0122	0.0002	0.0021	0.0824	0.0761		0.3587	0.4038	0.3587	0.6839	0.5581	1.2346	1.166	2.5799	3.3829
	219			kynurenine	LC/MS pos early	15140	C00328	HMDB00684	161166		0.76	1.46	1.93	1.11	0.9	0.81	1.95	1.8	0.92		0.1344	0.0761	0.04	0.0184	0.0046	0.0016	0.0272	0.0585	0.0706	0.0238	0.0059	0.0013	0.0019	0.0122	0.0003	0.0025	0.5322	0.2354		0.9626	0.7308	1.4083	5.8478	6.5038	5.2753	0.3579	0.6963	0.6427
	234			5-hydroxyindoleacetate	LC/MS pos early	437	C05635	HMDB00763	1826		3.85	2.92	0.76	2.1	1.58	0.75	0.18	0.18	1		0.0061	0.0115	0.0327	0.0158	0.4007	0.0515	0.0567	0.0941	0.1059	0.0339	0.385	0.041	0.0008	0.0102	0.0008	0.0055	---	---		0.3257	1.2543	0.9499	0.6311	1.3249	1.0001	1.6162	0.2981	0.2981
	235			serotonin	LC/MS pos early	2342	C00780	HMDB00259	5202		0.51	2.02	3.96	1.88	1	0.53	0.06	0.02	0.4		0.0029	0.0079	0.0011	0.0012	0.0001	0.0002	0.0132	0.0405	---	---	0.0132	0.0024	2.7233e-05	0.0039	4.0106e-05	0.0014	0.0121	0.0293		1.2116	0.6187	2.4484	0.3041	0.5707	0.3041	12.1679	0.7609	0.3041
	243			tryptophan betaine	LC/MS pos early	37097	C09213	HMDB61115	442106		0.47	1.49	3.17	0.9	0.79	0.89	1.24	0.99	0.8		0.0012	0.0051	0.013	0.0073	0.0001	0.0002	0.2569	0.2039	0.0379	0.0139	0.1167	0.0147	0.1249	0.1345	0.9883	0.3787	0.0277	0.0442		0.6446	0.3027	0.9588	5.4392	4.8718	4.3117	0.8941	1.105	0.8832
	250			C-glycosyltryptophan	LC/MS pos early	48782			10981970		0.92	1.19	1.29	0.75	0.83	1.1	0.89	0.68	0.77		0.5242	0.1993	0.1491	0.053	0.0342	0.0077	0.0435	0.0809	0.1345	0.0417	0.0947	0.0123	0.3629	0.2686	0.0258	0.0327	0.0063	0.024		0.6441	0.5908	0.7643	1.2438	0.937	1.0336	1.4677	1.299	0.9981
	255		Leucine, Isoleucine and Valine Metabolism	leucine	LC/MS pos early	60	C00123	HMDB00687	6106		0.77	0.64	0.83	1.07	0.71	0.66	1.16	0.86	0.75		0.0249	0.0255	0.0028	0.0022	0.0964	0.0172	0.219	0.1882	0.0031	0.0022	0.0018	0.0006	0.1307	0.1384	0.1352	0.096	0.0048	0.0238		0.6979	0.5403	0.4497	1.2443	1.3333	0.8832	1.211	1.4051	1.0473
	256			N-acetylleucine	LC/MS neg	1587	C02710	HMDB11756	70912		1.04	0.92	0.88	1.34	1.04	0.78	0.75	0.75	1		0.8566	0.2706	0.7388	0.1779	0.908	0.102	0.3776	0.2496	0.9908	0.2246	0.4002	0.0419	0.0242	0.0493	0.0624	0.0568	0.9778	0.3469		0.5293	0.5489	0.4848	0.8195	1.0965	0.8515	1.4341	1.0719	1.0768
	262			isovalerylglycine	LC/MS neg	35107		HMDB00678	546304		0.63	1.03	1.63	0.8	1.53	1.91	1.17	0.97	0.83		0.0969	0.0604	0.8661	0.1997	0.0571	0.0114	0.6292	0.3196	0.1558	0.0473	0.0188	0.0032	0.5695	0.3567	0.9793	0.3769	0.494	0.2215		1.1514	0.7293	1.1878	0.851	0.6786	1.2978	1.0114	1.1792	0.9769
	263			isovalerylcarnitine	LC/MS pos early	34407		HMDB00688	6426851		2.31	0.02	0.01	11.43	4.91	0.43	1.05	1.25	1.18		0.0005	0.005	4.6526e-05	0.0001	1.0449e-06	1.4219e-05	1.192e-05	0.0026	0.2702	0.075	0.094	0.0122	0.613	0.3715	0.3266	0.1792	0.4348	0.2049		6.6366	15.3621	0.1627	0.0212	0.2424	0.1041	1.0028	1.0575	1.2528
	266			beta-hydroxyisovalerate	LC/MS polar	12129		HMDB00754	69362		1.3	0.32	0.25	1.01	1	0.99	2.15	2.63	1.22		0.0836	0.0547	8.4968e-05	0.0002	0.0008	0.0005	0.391	0.2516	---	---	0.391	0.0412	0.0002	0.0064	0.0009	0.0055	0.2099	0.128		1.0404	1.3568	0.3337	0.3337	0.3379	0.3337	0.4512	0.9694	1.1846
	267			beta-hydroxyisovaleroylcarnitine	LC/MS pos early	35433					0.67	0.54	0.82	0.92	0.62	0.68	1	0.97	0.97		0.0105	0.0153	0.0023	0.0021	0.1151	0.0198	0.6562	0.3273	0.037	0.0137	0.0476	0.0067	0.9804	0.4765	0.7859	0.3254	0.7322	0.2901		2.0966	1.3955	1.1374	1.1358	1.0444	0.7065	0.7235	0.7211	0.699
	270			3-methylglutaconate	LC/MS polar	38667		HMDB00522	1551553		0.6	0.54	0.89	1.1	1.02	0.93	0.93	0.72	0.77		0.0408	0.0349	0.0094	0.0058	0.6718	0.0788	0.4555	0.2718	0.9009	0.2086	0.5607	0.0563	0.7145	0.3998	0.0849	0.0705	0.0049	0.0238		1.7636	1.0552	0.9438	0.8254	0.91	0.8456	1.2678	1.1782	0.9114
	274			alpha-hydroxyisovalerate	LC/MS polar	46537		HMDB00407	99823		0.87	0.65	0.74	1	1	1	4.98	5.09	1.02		0.5227	0.1993	0.0627	0.0259	0.1832	0.0284	---	---	---	---	---	---	0.0004	0.0074	2.6358e-05	0.0014	0.835	0.3122		0.453	0.396	0.2924	0.2924	0.2924	0.2924	0.3268	1.626	1.6639
	276			methylsuccinate	LC/MS polar	15745		HMDB01844	10349		1.39	1.35	0.97	0.73	1.78	2.45	1.35	1.29	0.95		0.0345	0.0322	0.046	0.0205	0.7301	0.0845	0.211	0.1865	0.0062	0.0035	0.0195	0.0032	0.0628	0.0868	0.1055	0.0819	0.6564	0.2689		1.2296	1.715	1.6621	0.9829	0.7144	1.7516	0.4842	0.6554	0.6255
	284			isoleucine	LC/MS pos early	1125	C00407	HMDB00172	6306		0.82	0.89	1.08	1.13	0.84	0.74	1.28	1.03	0.81		0.1208	0.0704	0.3264	0.0962	0.5728	0.0691	0.028	0.0595	0.0435	0.0154	0.0079	0.0016	0.036	0.063	0.6224	0.2766	0.0392	0.0529		0.6008	0.4944	0.5326	1.3209	1.4869	1.1047	0.9529	1.2155	0.9855
	288			2-methylbutyrylcarnitine (C5)	LC/MS pos early	45095		HMDB00378	6426901		0.57	0.03	0.04	0.86	0.15	0.17	1.05	0.94	0.9		0.0007	0.005	6.0524e-08	7.1712e-06	1.9419e-08	1.0491e-06	0.1894	0.1768	0.0052	0.003	0.0084	0.0016	0.7207	0.4015	0.5141	0.2404	0.4026	0.1931		15.0002	8.5658	0.3777	1.5122	1.2994	0.2264	0.8623	0.9028	0.8121
	290			tiglylcarnitine	LC/MS pos early	35428		HMDB02366	22833596		0.5	0.16	0.33	1.15	0.63	0.54	0.88	0.64	0.73		0.0008	0.005	6.2164e-06	5.4983e-05	0.0001	0.0002	0.1056	0.1328	0.0027	0.002	0.0011	0.0004	0.2745	0.2245	0.01	0.0201	0.0053	0.0238		3.0001	1.5062	0.4932	0.4581	0.527	0.2864	1.5444	1.3557	0.9895
	295			ethylmalonate	LC/MS polar	15765		HMDB00622	11756		1.29	0.17	0.13	1.23	0.62	0.5	4.08	3.83	0.94		0.0397	0.0344	7.4249e-06	5.4983e-05	7.4675e-06	3.1528e-05	0.1409	0.1479	0.0157	0.0069	0.0009	0.0004	3.3235e-05	0.0039	0.0002	0.0021	0.6278	0.2627		0.614	0.789	0.1018	1.5944	1.9608	0.987	0.3196	1.3038	1.2239
	296			valine	LC/MS pos early	1649	C00183	HMDB00883	6287		0.85	0.73	0.86	1.06	0.73	0.69	1.28	0.95	0.74		0.1167	0.0692	0.0099	0.0061	0.0829	0.0153	0.4072	0.2582	0.0097	0.0048	0.0036	0.0009	0.0305	0.0573	0.6134	0.2737	0.0027	0.0213		0.6275	0.5365	0.4605	1.0295	1.0895	0.7561	1.3447	1.7262	1.2808
	297			N-acetylvaline	LC/MS neg	1591		HMDB11757	66789		0.67	0.66	0.98	0.83	0.62	0.74	1.37	1.32	0.96		0.0056	0.0113	0.0046	0.0032	0.7914	0.0906	0.197	0.18	0.0115	0.0054	0.0073	0.0015	0.0103	0.0331	0.0118	0.0213	0.2403	0.1384		0.6679	0.4493	0.4398	1.3621	1.134	0.8447	0.9416	1.2943	1.2443
	300			isobutyrylcarnitine	LC/MS pos early	33441		HMDB00736	168379		2.07	0.08	0.04	1	1	1	0.88	0.86	0.97		0.0025	0.0072	5.2693e-05	0.0001	8.6869e-05	0.0002	---	---	---	---	---	---	0.5368	0.3476	0.4499	0.2186	0.8558	0.3182		1.6034	3.3127	0.1296	0.1296	0.1296	0.1296	0.8615	0.7588	0.7372
	302			3-hydroxyisobutyrate	LC/MS polar	1549	C06001	HMDB00336	87		1.72	0.64	0.37	1.04	1	0.96	1.19	1.12	0.94		0.0252	0.0255	0.0712	0.0289	0.0006	0.0004	0.391	0.2516	---	---	0.391	0.0412	0.0349	0.0613	0.4061	0.2063	0.5351	0.2354		0.4765	0.8202	0.3049	0.3049	0.3185	0.3049	1.1484	1.3648	1.2876
	312		Methionine, Cysteine, SAM and Taurine Metabolism	methionine	LC/MS pos early	1302	C00073	HMDB00696	6137		0.83	0.63	0.76	1.14	0.86	0.75	1.2	0.82	0.69		0.0701	0.0484	0.0013	0.0013	0.0225	0.0057	0.1128	0.1344	0.1243	0.0389	0.0121	0.0022	0.0445	0.0724	0.0397	0.0433	0.0003	0.0105		0.7371	0.6111	0.464	1.0141	1.1599	0.8677	1.4638	1.7509	1.1996
	313			N-acetylmethionine	LC/MS neg	1589	C02712	HMDB11745	448580		0.64	0.28	0.44	1.15	0.54	0.47	1.1	0.75	0.68		0.002	0.0066	2.2615e-06	3.0509e-05	0.0001	0.0002	0.2134	0.1871	0.0023	0.0018	0.0004	0.0003	0.2391	0.2075	0.0176	0.0263	0.0003	0.0105		0.9309	0.5935	0.2607	0.9664	1.1066	0.5208	1.9231	2.1144	1.4349
	314			N-formylmethionine	LC/MS neg	2829	C03145	HMDB01015	439750		0.52	0.27	0.53	1	0.24	0.24	1.2	0.99	0.82		0.0016	0.0058	3.1032e-05	0.0001	0.0015	0.0007	0.9225	0.3931	0.0009	0.0011	0.0028	0.0008	0.1026	0.1196	0.9499	0.3698	0.006	0.0238		1.7344	0.9038	0.476	1.8102	1.8076	0.4361	0.9051	1.0887	0.8918
	316			methionine sulfone	LC/MS pos early	44878			69961		0.91	1.03	1.13	1.19	0.76	0.64	1.65	1.6	0.97		0.5415	0.2044	0.8315	0.1928	0.3998	0.0515	0.1391	0.1479	0.0852	0.0279	0.0158	0.0027	0.0249	0.0504	0.0109	0.0207	0.9384	0.3394		1.0205	0.9249	1.0488	1.959	2.3264	1.4856	0.3057	0.5031	0.4897
	317			methionine sulfoxide	LC/MS pos early	18374	C02989	HMDB02005	158980		0.89	0.91	1.03	1.03	0.86	0.84	1.7	1.2	0.71		0.2165	0.1068	0.3186	0.0951	0.8114	0.0922	0.6248	0.3182	0.1749	0.0526	0.0022	0.0007	0.0093	0.0314	0.0548	0.0522	0.0429	0.0553		1.0654	0.9486	0.9731	2.0548	2.1267	1.7765	0.5007	0.8495	0.5995
	318			N-acetylmethionine sulfoxide	LC/MS pos early	45428			193368		0.69	0.23	0.33	1.22	0.52	0.42	1.42	0.93	0.65		0.0536	0.0422	2.1976e-05	9.6436e-05	0.0011	0.0006	0.0863	0.1173	0.001	0.0011	0.0002	0.0002	0.0155	0.0389	0.3536	0.1884	0.007	0.0257		1.0686	0.7338	0.2449	0.8815	1.0727	0.4551	1.624	2.307	1.5064
	319			S-adenosylmethionine (SAM)	LC/MS pos early	15915	C00019	HMDB01185	34755		0.76	1.2	1.59	1.04	0.29	0.28	1.34	1.16	0.87		0.0565	0.0431	0.1579	0.0552	0.0081	0.0025	0.5213	0.293	0.0003	0.0008	0.0004	0.0003	0.0873	0.1076	0.232	0.144	0.2898	0.1583		0.958	0.7234	1.1505	1.032	1.0781	0.3032	0.9018	1.2084	1.0466
	320			S-adenosylhomocysteine (SAH)	LC/MS neg	42382	C00021	HMDB00939	439155		0.75	1.31	1.76	0.8	0.54	0.67	1.43	1.26	0.88		0.0316	0.0302	0.0272	0.0135	0.0022	0.0009	0.0455	0.0818	0.0003	0.0008	0.0037	0.0009	0.0045	0.0221	0.0283	0.0343	0.0575	0.0624		0.8768	0.6538	1.15	1.0976	0.8792	0.5893	0.9431	1.3472	1.1854
	321			homocysteine	LC/MS pos early	15128	C00155	HMDB00742	778		1.43	2.49	1.74	1.21	1.24	1.03	1.49	1.16	0.78		0.1372	0.0772	0.0003	0.0005	0.0293	0.0068	0.1117	0.1344	0.0599	0.0208	0.7944	0.0765	0.0271	0.0536	0.3814	0.1977	0.1665	0.1122		0.3651	0.5224	0.9076	0.8732	1.0544	1.0842	4.157	6.2138	4.8399
	324			cystathionine	LC/MS pos early	15705	C02291	HMDB00099	439258		0.8	1.48	1.86	1.23	0.4	0.32	1.52	1.2	0.79		0.0569	0.0431	0.0046	0.0032	0.0005	0.0004	0.2204	0.1887	0.0039	0.0025	0.0011	0.0004	0.016	0.039	0.1722	0.1142	0.063	0.0646		7.0606	5.6181	10.4507	0.3063	0.3763	0.1218	0.8362	1.2679	1.0054
	327			2-aminobutyrate	LC/MS pos early	42374	C02261	HMDB00650	439691		0.76	0.85	1.12	1.15	0.67	0.59	0.77	0.77	0.99		0.2537	0.1198	0.519	0.1367	0.2915	0.0402	0.2923	0.2194	0.0182	0.0078	0.0028	0.0008	0.1703	0.1658	0.145	0.1009	0.9814	0.3475		1.0952	0.8332	0.9331	1.458	1.6733	0.9796	1.1255	0.8688	0.8634
	329			cysteine	LC/MS pos early	1868	C00097	HMDB00574	5862		0.52	1.08	2.1	0.83	0.79	0.96	1.19	0.97	0.81		0.0043	0.0098	0.3708	0.1054	0.0066	0.0021	0.0995	0.1288	0.0662	0.0225	0.5204	0.0528	0.0598	0.0843	0.6943	0.2972	0.0074	0.0259		0.944	0.4873	1.0219	1.1465	0.9488	0.907	0.9963	1.1894	0.9635
	330			N-acetylcysteine	LC/MS pos early	1586	C06809	HMDB01890	12035		1.74	1.24	0.71	0.91	1.13	1.24	1.45	1.33	0.92		0.6978	0.2398	0.1342	0.0488	0.9458	0.1055	0.5398	0.2972	0.4816	0.121	0.1891	0.0224	0.0606	0.085	0.0457	0.0463	0.6414	0.2664		1.1899	2.075	1.476	0.9535	0.8666	1.0777	0.7909	1.1495	1.0556
	331			cystine	LC/MS pos early	56	C00491	HMDB00192	67678		0.19	5.43	28.04	0.54	2.7	5	0.88	0.41	0.47		0.0026	0.0072	0.0002	0.0003	0.0001	0.0002	0.0087	0.0334	0.0008	0.0011	1.8033e-05	6.3886e-05	0.1421	0.1468	0.0015	0.0069	0.0057	0.0238		0.8299	0.1608	4.5088	0.5661	0.3059	1.5299	1.9944	1.7579	0.8247
	332			S-methylcysteine	LC/MS pos early	39592		HMDB02108	24417		0.95	1.37	1.44	1.42	0.91	0.64	1.26	0.84	0.67		0.7188	0.2448	0.058	0.0247	0.1625	0.0255	0.0315	0.0636	0.5145	0.1284	0.0018	0.0006	0.1338	0.1405	0.269	0.1577	0.0091	0.0293		0.7276	0.6937	0.9972	0.9153	1.297	0.8329	1.3222	1.6691	1.1153
	337			cysteine sulfinic acid	LC/MS pos early	37443	C00606	HMDB00996	109		0.25	0.19	0.74	0.81	1.22	1.51	1.15	0.56	0.49		0.001	0.005	0.0004	0.0005	0.1957	0.0296	0.0267	0.0581	0.1493	0.0457	0.016	0.0028	0.444	0.3079	0.0144	0.024	0.0039	0.0238		12.4646	3.1157	2.3108	0.7097	0.5726	0.8637	0.9718	1.1172	0.5436
	339			hypotaurine	LC/MS pos early	590	C00519	HMDB00965	107812		0.5	1.55	3.06	0.85	1.25	1.47	1.03	0.91	0.89		0.0017	0.0058	0.004	0.003	0.0008	0.0005	0.0072	0.0308	0.0144	0.0064	0.0026	0.0007	0.7756	0.4173	0.3605	0.1903	0.2472	0.1411		0.9089	0.4586	1.4052	1.5455	1.3195	1.9374	0.8738	0.8977	0.7959
	340			taurine	LC/MS neg	2125	C00245	HMDB00251	1123		0.6	1.52	2.54	0.78	1.19	1.53	0.98	0.85	0.86		0.0035	0.0091	0.0078	0.0051	0.0003	0.0003	0.0027	0.0214	0.0152	0.0067	0.0004	0.0003	0.784	0.4185	0.0954	0.0767	0.1004	0.0863		0.7971	0.4789	1.2143	1.8083	1.4038	2.15	0.9463	0.927	0.8005
	341			N-acetyltaurine	LC/MS polar	48187			159864		0.53	2.23	4.25	0.99	1.11	1.11	1.54	1.48	0.96		0.0075	0.0125	0.0019	0.0017	0.0001	0.0002	0.9062	0.391	0.5731	0.1416	0.5468	0.0552	0.0015	0.0112	0.0025	0.0093	0.4578	0.2115		0.3086	0.1624	0.6894	1.0729	1.0663	1.1876	0.924	1.4248	1.3721
	348		Urea cycle; Arginine and Proline Metabolism	arginine	LC/MS pos early	1638	C00062	HMDB00517	232		0.93	1.32	1.41	1.06	0.86	0.82	1.09	0.78	0.72		0.5883	0.2131	0.0356	0.0168	0.0329	0.0075	0.4261	0.2622	0.0602	0.0208	0.0173	0.0029	0.4519	0.3091	0.0509	0.0498	0.0126	0.0297		0.8108	0.7552	1.0684	1.1491	1.216	0.9919	0.9208	1.0033	0.72
	351			ornithine	LC/MS pos early	1493	C00077	HMDB03374	6262		0.95	1.67	1.77	0.82	0.5	0.6	0.97	0.73	0.75		0.7654	0.2522	0.0216	0.0111	0.0135	0.0037	0.0882	0.1192	0.0006	0.001	0.0023	0.0007	0.8049	0.4266	0.0249	0.0327	0.0051	0.0238		1.0371	0.9804	1.7321	1.9882	1.6343	0.9884	0.2296	0.2225	0.1672
	352			proline	LC/MS pos early	1898	C00148	HMDB00162	145742		0.74	0.89	1.2	0.88	0.71	0.8	1.23	1.03	0.84		0.043	0.0364	0.2943	0.0896	0.0913	0.0165	0.0454	0.0818	0.0059	0.0034	0.0301	0.0046	0.0577	0.0838	0.6571	0.2881	0.0477	0.0563		1.0975	0.8099	0.9713	1.0887	0.9624	0.7706	1.0138	1.2456	1.0425
	353			citrulline	LC/MS pos early	2132	C00327	HMDB00904	9750		1.15	8.57	7.44	0.52	0.87	1.68	2.65	3.42	1.29		0.597	0.2148	1.3463e-05	7.9048e-05	0.0002	0.0002	0.0018	0.0193	0.2942	0.0805	0.0018	0.0006	0.0365	0.0634	0.0008	0.0055	0.3311	0.1726		0.7704	0.8869	6.6015	25.3253	13.1154	22.0691	0.1801	0.4766	0.6153
	354			argininosuccinate	LC/MS pos early	15497	C03406	HMDB00052	16950;828		0.97	0.37	0.38	1.23	0.37	0.3	1.3	0.93	0.71		0.8331	0.2653	0.0002	0.0003	0.0002	0.0002	0.0622	0.0982	0.0004	0.0008	0.0006	0.0003	0.0146	0.037	0.4235	0.2101	0.0169	0.0342		1.1659	1.1304	0.4309	1.069	1.3096	0.3944	0.9338	1.2167	0.8641
	355			homoarginine	LC/MS pos early	22137	C01924	HMDB00670	9085		1.21	2.62	2.16	1.14	0.84	0.74	1.36	1.46	1.08		0.4253	0.1781	0.0076	0.005	0.0122	0.0035	0.2585	0.2044	0.2616	0.0733	0.0961	0.0124	0.3369	0.2558	0.1668	0.1121	0.6678	0.2709		0.8395	1.0186	2.2028	1.3243	1.5123	1.116	0.4411	0.5992	0.6443
	356			homocitrulline	LC/MS pos early	22138	C02427	HMDB00679	65072		0.87	0.87	1	1.24	0.65	0.53	1.94	1.72	0.89		0.3827	0.165	0.4101	0.1138	0.9111	0.1021	0.0227	0.0536	0.0076	0.0041	0.0038	0.0009	0.0024	0.0145	0.0036	0.0113	0.3611	0.1816		1.1029	0.9632	0.9612	2.5475	3.1611	1.666	0.3796	0.7376	0.6536
	360			dimethylarginine (SDMA + ADMA)	LC/MS pos early	36808	C03626	HMDB01539	123831		0.66	0.52	0.78	1.15	0.65	0.56	1.23	0.94	0.77		0.055	0.043	0.0002	0.0003	0.2493	0.0356	0.142	0.1479	0.0034	0.0023	0.0003	0.0002	0.065	0.0883	0.5737	0.2618	0.0043	0.0238		0.8381	0.5531	0.4318	0.9733	1.1207	0.6316	1.331	1.6367	1.2565
	361			N-acetylarginine	LC/MS pos early	33953	C02562	HMDB04620	67427		0.86	1.47	1.72	0.94	0.93	0.99	0.99	0.9	0.91		0.2637	0.1233	0.0161	0.0087	0.0015	0.0008	0.4486	0.2703	0.4083	0.1052	0.8051	0.0771	0.9269	0.463	0.6556	0.288	0.31	0.1662		0.6801	0.5821	1.0015	1.1699	1.098	1.0872	1.0569	1.0479	0.9558
	364			N-delta-acetylornithine	LC/MS pos early	43249			9920500		0.9	1.01	1.11	1.11	0.72	0.64	2.02	1.89	0.94		0.7033	0.2401	0.9253	0.2106	0.559	0.0681	0.166	0.1611	0.0062	0.0035	0.0009	0.0004	0.0195	0.0437	1.557e-05	0.0014	0.8327	0.3121		1.1392	1.0298	1.145	2.498	2.7808	1.7895	0.1954	0.3938	0.3687
	368			N-methylproline	LC/MS pos early	37431			557		0.74	1.1	1.48	0.94	0.66	0.7	1.03	0.82	0.79		0.0378	0.0338	0.2848	0.0879	0.0131	0.0036	0.6217	0.3181	0.0356	0.0133	0.0574	0.0079	0.8432	0.4391	0.2587	0.1539	0.1699	0.1128		1.2819	0.9517	1.4065	1.2749	1.2002	0.8434	0.7317	0.7564	0.601
	370			trans-4-hydroxyproline	LC/MS pos early	32306	C01157	HMDB00725	5810		0.64	0.7	1.09	1.26	0.46	0.37	1.31	1.05	0.81		0.0132	0.0173	0.036	0.0169	0.2893	0.04	0.0025	0.0208	0.002	0.0017	0.001	0.0004	0.053	0.0828	0.5518	0.2529	0.0543	0.0607		1.5559	0.9943	1.0843	1.0957	1.377	0.5054	0.0439	0.0573	0.0462
	372			pro-hydroxy-pro	LC/MS pos early	35127		HMDB06695	11673055		0.45	1.07	2.39	0.67	0.49	0.73	0.98	1.02	1.04		0.0073	0.0124	0.6195	0.1565	0.0033	0.0013	0.0207	0.0518	0.0283	0.0112	0.1799	0.0216	0.8712	0.4454	0.6951	0.2972	0.7461	0.2931		1.4755	0.6611	1.5813	1.6231	1.0911	0.7923	0.7563	0.7409	0.7722
	373			N-monomethylarginine	LC/MS pos early	43586	C03884	HMDB29416	132862		0.68	0.38	0.56	1.22	0.68	0.56	1.2	0.87	0.73		0.052	0.0416	4.4267e-05	0.0001	0.0231	0.0058	0.044	0.0811	0.0124	0.0058	0.0037	0.0009	0.0717	0.0936	0.1632	0.1108	0.0013	0.0141		0.9896	0.6704	0.3761	0.9294	1.1376	0.6341	1.7835	2.1372	1.5594
	377		Creatine Metabolism	creatine	LC/MS pos early	27718	C00300	HMDB00064	586		0.73	0.93	1.28	1.07	0.53	0.49	1.02	0.78	0.76		0.0435	0.0366	0.5083	0.1341	0.0713	0.0135	0.5875	0.3086	0.0005	0.0009	0.0008	0.0004	0.8315	0.4347	0.1174	0.0883	0.0447	0.0562		1.2868	0.9388	1.2024	1.1434	1.2198	0.6019	0.5843	0.5986	0.4536
	378			creatinine	LC/MS pos early	513	C00791	HMDB00562	588		0.69	1.19	1.73	1.24	0.6	0.49	1.15	0.98	0.86		0.017	0.0196	0.1087	0.0414	0.0028	0.0011	0.1421	0.1479	0.0014	0.0014	0.0019	0.0006	0.354	0.2646	0.9931	0.3791	0.1926	0.1214		1.391	0.9576	1.6569	1.0776	1.3354	0.6512	0.4384	0.5032	0.4311
	380			creatine phosphate	LC/MS polar	33951	C02305	HMDB01511	587		0.91	0.47	0.52	3.29	0.39	0.12	0.74	0.63	0.84		0.8149	0.2621	0.0975	0.0381	0.1193	0.0203	0.0131	0.0405	0.09	0.0293	0.0244	0.0039	0.3047	0.24	0.0746	0.0643	0.699	0.2793		0.1319	0.1194	0.0617	1.2937	4.2538	0.5042	1.4191	1.053	0.8885
	383			guanidinoacetate	LC/MS pos early	43802	C00581	HMDB00128	763		1.15	1.48	1.29	2.2	1.23	0.56	2.46	2.26	0.92		0.2967	0.1344	0.0218	0.0112	0.032	0.0074	0.0008	0.0136	0.038	0.0139	0.0017	0.0006	0.0006	0.009	2.4966e-05	0.0014	0.4812	0.219		5.8781	6.7441	8.7176	0.604	1.3272	0.7417	0.3795	0.9331	0.8562
	387		Polyamine Metabolism	putrescine	LC/MS pos early	1408	C00134	HMDB01414	1045		0.51	0.89	1.74	0.92	0.41	0.45	1.05	0.81	0.77		0.0166	0.0195	0.6519	0.1633	0.0046	0.0016	0.4298	0.2626	0.0001	0.0004	0.0016	0.0005	0.7223	0.4015	0.2132	0.1352	0.0769	0.074		0.1287	0.0659	0.1147	1.2052	1.1033	0.4917	4.8909	5.1482	3.9643
	388			spermine	LC/MS pos late	603	C00750	HMDB01256	1103		0.84	0.91	1.08	1.2	0.93	0.77	0.92	0.55	0.6		0.3214	0.1432	0.4575	0.124	0.6668	0.0784	0.5529	0.3014	0.9384	0.2165	0.4202	0.0435	0.7446	0.4068	0.0354	0.0399	0.0463	0.0562		0.7719	0.6457	0.6997	1.1753	1.4111	1.0932	1.5001	1.3811	0.8237
	390			spermidine	LC/MS pos early	485	C00315	HMDB01257	1102		0.64	0.63	0.98	1.09	0.42	0.38	1.08	0.89	0.83		0.024	0.0252	0.002	0.0018	0.9727	0.1083	0.433	0.2638	0.0023	0.0018	4.7095e-06	3.311e-05	0.5446	0.35	0.4915	0.233	0.0674	0.0672		0.8544	0.5495	0.5371	1.184	1.2931	0.4972	1.2866	1.3875	1.1472
	391			5-methylthioadenosine (MTA)	LC/MS pos early	1419	C00170	HMDB01173	439176		0.84	0.95	1.13	1.02	0.52	0.51	1.28	1.15	0.9		0.1397	0.0772	0.6416	0.1611	0.1483	0.0238	0.7036	0.3377	0.0005	0.0009	0.001	0.0004	0.1126	0.1275	0.2749	0.1605	0.3554	0.1802		1.1581	0.9741	1.1044	1.5738	1.6034	0.8153	0.5241	0.6713	0.6047
	394			N-acetylputrescine	LC/MS pos early	37496	C02714	HMDB02064	122356		0.44	1.16	2.6	0.91	0.38	0.42	1.64	1.62	0.99		0.0125	0.0168	0.3289	0.0965	1.2433e-05	4.3227e-05	0.5183	0.2923	0.0004	0.0008	0.0008	0.0004	0.0221	0.0475	0.0247	0.0327	0.9944	0.3508		0.4273	0.1899	0.4942	1.2808	1.1642	0.4904	2.3241	3.8072	3.7557
	395			4-acetamidobutanoate	LC/MS pos early	1558	C02946	HMDB03681	18189		1.27	1.55	1.22	0.92	1.46	1.59	1.05	0.84	0.79		0.1174	0.0694	0.0127	0.0072	0.1865	0.0288	0.7806	0.3529	0.0932	0.0302	0.0042	0.001	0.6872	0.3905	0.1027	0.0806	0.0944	0.0831		0.867	1.0985	1.3438	1.057	0.9677	1.5381	0.9258	0.9766	0.7746
	398		Guanidino and Acetamido Metabolism	1-methylguanidine	LC/MS pos early	48114	C02294	HMDB01522	10111		1.11	2.32	2.09	1.15	2.91	2.53	1.01	1.08	1.06		0.3883	0.1661	0.0001	0.0003	0.0007	0.0005	0.391	0.2516	0.0002	0.0007	0.0017	0.0005	0.391	0.2802	0.22	0.1378	0.3039	0.1635		0.7728	0.8582	1.7916	0.6735	0.7749	1.9614	0.6735	0.6826	0.7243
	400			4-guanidinobutanoate	LC/MS pos early	15681	C01035	HMDB03464	500		0.6	1.38	2.31	0.86	0.71	0.83	1.32	1.17	0.88		0.0004	0.005	0.0023	0.002	2.7054e-05	7.9954e-05	0.346	0.2344	0.0603	0.0208	0.0302	0.0046	0.0108	0.0337	0.0661	0.0598	0.0906	0.0805		0.9716	0.5803	1.3412	1.9983	1.7231	1.4262	0.3188	0.4217	0.3723
	402		Glutathione Metabolism	glutathione, reduced (GSH)	LC/MS pos early	2127	C00051	HMDB00125	124886		1.26	0.71	0.57	1.03	0.53	0.52	1.69	2.49	1.48		0.1258	0.0728	0.035	0.0167	0.0034	0.0013	0.7001	0.337	0.0013	0.0013	0.0013	0.0005	0.0126	0.0352	0.0009	0.0055	0.0474	0.0563		0.9761	1.2253	0.6927	1.94	1.9962	1.0367	0.4454	0.7508	1.1077
	403			glutathione, oxidized (GSSG)	LC/MS pos early	27727	C00127	HMDB03337	65359		1.53	2.86	1.88	0.82	1.04	1.26	1.79	3.25	1.81		0.0752	0.0508	0.0004	0.0005	0.0152	0.0041	0.097	0.1263	0.6438	0.1574	0.0075	0.0015	0.0078	0.0282	0.0002	0.0021	0.005	0.0238		0.7664	1.1697	2.1951	2.0264	1.6628	2.1007	0.1776	0.3187	0.5768
	405			cysteine-glutathione disulfide	LC/MS pos early	35159		HMDB00656	4247235		0.57	3.71	6.54	0.66	1.59	2.41	1.24	1.13	0.91		0.001	0.005	0.0001	0.0003	0.0001	0.0002	0.0096	0.0343	0.005	0.0029	5.0043e-05	8.9638e-05	0.0532	0.0828	0.2238	0.1393	0.2551	0.1434		1.0297	0.5839	3.8165	1.4808	0.9808	2.3597	0.7975	0.9881	0.8981
	406			S-methylglutathione	LC/MS pos early	33944	C11347		3605667		2.03	0.99	0.49	1.19	0.52	0.43	1.42	2.03	1.43		0.0384	0.0339	0.9828	0.2218	0.041	0.0089	0.1419	0.1479	0.0029	0.0021	0.0011	0.0004	0.0992	0.1178	0.0136	0.0236	0.0855	0.0782		0.9905	2.0068	0.9847	1.8074	2.1556	0.932	0.4872	0.6902	0.987
	408			cysteinylglycine	LC/MS pos early	35637	C01419	HMDB00078	439498		0.47	0.67	1.43	0.81	0.46	0.57	1.48	1.92	1.29		0.0042	0.0098	0.0415	0.0189	0.0448	0.0094	0.2925	0.2194	0.0063	0.0035	0.0078	0.0015	0.03	0.0568	0.0099	0.0201	0.1777	0.1158		1.3505	0.6323	0.9044	2.8108	2.2771	1.2993	0.5141	0.7622	0.9847
	410			5-oxoproline	LC/MS neg	1494	C01879	HMDB00267	7405		0.5	1.2	2.38	1.04	0.85	0.82	1.37	1.24	0.91		0.0058	0.0114	0.2059	0.0663	0.0012	0.0006	0.2492	0.2015	0.0718	0.024	0.0432	0.0062	0.0167	0.0397	0.0496	0.049	0.0147	0.0316		1.0343	0.5206	1.2398	0.9453	0.9788	0.799	0.9351	1.2831	1.1641
	411			ophthalmate	LC/MS pos early	34592		HMDB05765	7018721		5.29	0.33	0.06	0.91	0.52	0.57	0.95	0.49	0.52		0.0001	0.0047	0.0002	0.0003	2.4609e-06	2.0642e-05	0.7649	0.3487	0.0429	0.0154	0.0135	0.0024	0.6863	0.3905	0.0014	0.0066	0.0015	0.0144		0.3455	1.8273	0.1126	1.9764	1.7964	1.0301	1.0035	0.9487	0.4928
	413			S-nitrosoglutathione (GSNO)	LC/MS pos early	47127		HMDB04645	3514		3.33	0.8	0.24	0.7	0.67	0.96	1	1.21	1.21		0.0374	0.0336	0.1817	0.0619	0.0284	0.0067	0.3214	0.2292	0.2811	0.0778	0.9645	0.0913	---	---	0.391	0.2006	0.391	0.1895		0.7061	2.3492	0.5669	1.079	0.7558	0.7278	0.5669	0.5669	0.6868
	418	Peptide	Gamma-glutamyl Amino Acid	gamma-glutamylalanine	LC/MS pos early	37063		HMDB29142	440103		0.52	0.56	1.08	1.06	0.43	0.4	1.09	0.93	0.84		0.0658	0.0465	0.0017	0.0016	0.5895	0.0704	0.2515	0.2025	0.0006	0.0009	0.0006	0.0003	0.3478	0.261	0.446	0.2178	0.0463	0.0562		1.5834	0.8179	0.8822	0.9519	1.0065	0.4066	1.2181	1.3337	1.1269
	419			gamma-glutamylcysteine	LC/MS pos early	1778	C00669	HMDB01049	842		0.62	1.42	2.31	1.01	1.06	1.06	1.47	1.37	0.93		0.0206	0.0224	0.0033	0.0026	0.0029	0.0011	0.894	0.3896	0.4581	0.116	0.4616	0.0473	0.0046	0.0221	0.0116	0.0211	0.2744	0.1524		0.8649	0.5346	1.2323	1.0992	1.1059	1.1675	0.6719	0.9895	0.9195
	420			gamma-glutamylglutamate	LC/MS pos early	36738	C05282	HMDB11737	92865		0.65	1.38	2.13	1.04	1.72	1.67	1.2	1.06	0.88		0.1074	0.0655	0.0302	0.0148	0.0282	0.0067	0.7075	0.3382	0.0003	0.0008	0.0015	0.0005	0.1951	0.1791	0.5242	0.2436	0.3406	0.1753		1.0411	0.6733	1.4344	0.9446	0.9777	1.629	0.9134	1.0993	0.9718
	421			gamma-glutamylglutamine	LC/MS pos early	2730	C05283	HMDB11738	150914		0.12	1.88	15.28	1.07	0.63	0.59	1.17	0.9	0.77		0.0025	0.0072	0.0165	0.0088	0.0022	0.0009	0.4146	0.2606	0.0035	0.0023	0.0019	0.0006	0.1149	0.1286	0.2452	0.148	0.0046	0.0238		1.114	0.1373	2.0979	1.8141	1.9354	1.1409	0.4785	0.5581	0.4283
	422			gamma-glutamylglycine	LC/MS pos early	33949		HMDB11667	165527		0.68	2.29	3.39	1	1.36	1.36	1.38	1.11	0.81		0.1726	0.0904	0.0001	0.0002	0.014	0.0038	0.8981	0.3899	0.0016	0.0014	0.0059	0.0013	0.0097	0.0321	0.2443	0.1479	0.0271	0.0436		1.0401	0.704	2.3855	0.909	0.9047	1.233	0.9928	1.371	1.106
	423			gamma-glutamylhistidine	LC/MS pos early	18245			7017195		0.55	1.09	1.96	1.03	0.92	0.89	1.85	1.54	0.83		0.04	0.0344	0.6717	0.1668	0.0287	0.0067	0.7049	0.3377	0.3578	0.0936	0.242	0.0273	0.0018	0.0122	0.0103	0.0205	0.1127	0.0898		0.5991	0.332	0.6517	1.1421	1.1743	1.0485	0.7512	1.3891	1.1544
	424			gamma-glutamylisoleucine*	LC/MS pos early	34456		HMDB11170	14253342		0.67	2.1	3.11	0.85	1.17	1.38	1.39	1.07	0.77		0.0084	0.0133	0.0004	0.0005	1.9674e-05	6.4603e-05	0.107	0.1332	0.0895	0.0292	0.0008	0.0004	0.0178	0.041	0.4586	0.2223	0.003	0.0226		0.325	0.2187	0.6812	1.061	0.9041	1.2453	1.0861	1.5057	1.1596
	425			gamma-glutamylleucine	LC/MS pos early	18369		HMDB11171	151023		0.6	1.22	2.03	0.94	1.12	1.19	1.56	1.22	0.78		0.0014	0.0056	0.0596	0.025	0.0003	0.0003	0.4734	0.2764	0.1976	0.0586	0.037	0.0055	0.0007	0.0094	0.0419	0.0448	0.012	0.0293		0.4351	0.2613	0.5304	1.0114	0.9544	1.135	1.2064	1.8861	1.4662
	426			gamma-glutamyl-epsilon-lysine	LC/MS pos early	33934		HMDB03869	65254;14284565		0.94	1.34	1.43	0.76	0.97	1.28	1.63	1.42	0.87		0.5757	0.2109	0.0191	0.01	0.0225	0.0057	0.0119	0.0401	0.7099	0.1718	0.0128	0.0023	0.0022	0.0135	0.0138	0.0236	0.1572	0.1093		0.8543	0.8022	1.1439	0.9762	0.7415	0.9501	1.4905	2.4292	2.1197
	427			gamma-glutamylmethionine	LC/MS pos early	44872		HMDB29155	7009567		0.66	1.14	1.72	1.07	1.28	1.19	1.37	1.06	0.77		0.1607	0.0861	0.3171	0.0949	0.1013	0.0179	0.3392	0.2327	0.0171	0.0074	0.0453	0.0065	0.0061	0.0253	0.6228	0.2766	0.0394	0.0529		0.6929	0.459	0.789	0.8944	0.9589	1.1412	1.2088	1.6556	1.2804
	428			gamma-glutamylphenylalanine	LC/MS pos early	33422		HMDB00594	111299		0.56	1.35	2.43	0.96	1.02	1.06	2.07	1.99	0.96		0.1054	0.0647	0.0573	0.0245	0.0418	0.0089	0.8333	0.3676	0.7901	0.1881	0.5157	0.0524	0.0002	0.0064	0.0039	0.0116	0.6817	0.2752		0.5049	0.2818	0.684	1.1167	1.0761	1.1394	0.965	2.001	1.9184
	429			gamma-glutamylthreonine*	LC/MS pos early	33364		HMDB29159			0.69	1.57	2.27	0.82	1.17	1.44	1.58	1.1	0.7		0.0219	0.0235	0.0041	0.003	0.0009	0.0006	0.0378	0.0737	0.0645	0.022	1.5597e-05	6.3886e-05	0.0022	0.0135	0.2129	0.1352	0.0072	0.0259		0.6114	0.4227	0.9587	0.894	0.73	1.0485	3.4225	5.4056	3.7692
	431			gamma-glutamyltyrosine	LC/MS neg	2734		HMDB11741	94340		0.58	1.05	1.82	1.03	1.15	1.12	2.28	1.71	0.75		0.0532	0.0422	0.5253	0.1374	0.0449	0.0094	0.7193	0.339	0.3567	0.0935	0.3874	0.0411	0.0015	0.0112	0.0066	0.0158	0.0322	0.0493		0.5923	0.3422	0.6215	1.0308	1.0582	1.1853	0.8079	1.8457	1.3833
	432			gamma-glutamylvaline	LC/MS pos early	43829		HMDB11172	7015683		0.84	2.63	3.11	0.75	1.53	2.05	1.44	1.1	0.77		0.6499	0.2277	0.03	0.0147	0.027	0.0065	0.0564	0.0941	0.001	0.0012	0.0049	0.0011	0.0122	0.0352	0.3066	0.1708	0.0186	0.0358		0.2728	0.2303	0.7162	0.9874	0.7358	1.5089	3.063	4.4072	3.3846
	434		Dipeptide Derivative	carnosine	LC/MS pos early	1768	C00386	HMDB00033	439224		0.99	1.35	1.36	1.01	0.99	0.98	1.04	0.85	0.82		0.9676	0.2964	0.0294	0.0145	0.0326	0.0075	0.908	0.391	0.868	0.2038	0.7368	0.0718	0.5812	0.3591	0.0934	0.0759	0.0225	0.0396		1.1494	1.1431	1.5519	1.0431	1.0502	1.0284	0.4831	0.5043	0.413
	437			anserine	LC/MS pos early	15747	C01262	HMDB00194	112072		0.79	1.3	1.66	1.14	0.73	0.64	0.91	0.95	1.05		0.23	0.1117	0.1434	0.0515	0.005	0.0017	0.7379	0.3429	0.2604	0.0733	0.2014	0.0235	0.7579	0.4132	0.9158	0.36	0.7928	0.3027		1.5868	1.2463	2.0686	0.7706	0.8786	0.5629	0.7856	0.7112	0.7486
	448		Dipeptide	alanylleucine	LC/MS pos early	37093		HMDB28691	259583		0.51	0.16	0.32	1.12	0.29	0.26	1.1	1.04	0.95		0.0656	0.0465	6.8517e-05	0.0002	0.0377	0.0083	0.4909	0.2832	0.0011	0.0012	0.0002	0.0002	0.5831	0.3593	0.859	0.3483	0.7678	0.2972		0.9144	0.4682	0.1497	1.5026	1.6829	0.4346	1.1181	1.2321	1.1662
	547			glutamine-leucine	LC/MS pos early	42994					0.54	0.23	0.42	1.21	0.14	0.11	1.34	1.03	0.76		0.051	0.0413	0.0002	0.0003	0.0451	0.0095	0.2863	0.2169	0.0007	0.0011	0.0021	0.0007	0.0074	0.0281	0.8539	0.3472	0.0459	0.0562		1.0636	0.5705	0.2404	2.6146	3.1573	0.3545	0.7877	1.0573	0.8088
	559			glycylisoleucine	LC/MS pos early	36659		HMDB28844	88079		0.61	0.3	0.49	1.19	0.38	0.32	1.15	0.95	0.83		0.0534	0.0422	0.0001	0.0002	0.0332	0.0075	0.3511	0.2357	0.0107	0.0052	0.0008	0.0004	0.244	0.2089	0.5833	0.2648	0.0973	0.0845		0.9365	0.5757	0.2808	0.7712	0.9199	0.2904	3.1231	3.5766	2.9679
	560			glycylleucine	LC/MS pos early	34398	C02155	HMDB00759	92843		0.57	0.19	0.34	1.17	0.42	0.36	1.2	0.93	0.77		0.0171	0.0197	1.4134e-06	3.0509e-05	0.0017	0.0008	0.2412	0.1979	0.002	0.0017	0.0023	0.0007	0.0727	0.0941	0.3935	0.2012	0.0113	0.0293		0.859	0.4892	0.1664	0.9592	1.1198	0.4035	1.8582	2.2334	1.7217
	570			glycylvaline	LC/MS pos early	18357		HMDB28854	97417		0.6	0.24	0.39	1.09	0.56	0.52	1.16	0.85	0.73		0.0147	0.0187	0.0001	0.0003	0.001	0.0006	0.4229	0.2622	0.009	0.0046	0.0002	0.0002	0.1274	0.1365	0.0805	0.0685	0.0106	0.0293		0.866	0.5205	0.2042	1.0092	1.1029	0.5686	2.4939	2.8991	2.1078
	594			isoleucylglycine	LC/MS pos early	40008			342532		0.63	0.29	0.47	1.06	0.48	0.46	1.13	0.91	0.81		0.0634	0.046	1.9445e-05	8.861e-05	0.0288	0.0067	0.5599	0.3042	0.0019	0.0016	0.0004	0.0003	0.0928	0.1125	0.1694	0.1131	0.0097	0.0293		1.1749	0.7379	0.3461	0.9069	0.9569	0.4375	1.4698	1.6558	1.3363
	607			leucylalanine	LC/MS pos early	40010			259321		0.44	0.1	0.23	0.68	0.13	0.19	0.95	0.84	0.88		0.1163	0.0692	0.0002	0.0003	0.122	0.0205	0.1367	0.1479	0.0145	0.0064	0.0271	0.0042	0.9895	0.4781	0.5067	0.2376	0.4918	0.2215		1.1228	0.496	0.1159	2.1168	1.4421	0.2691	0.8726	0.8286	0.7291
	612			leucylglycine	LC/MS pos early	40045			79070		0.73	0.45	0.62	1.05	0.54	0.51	0.99	0.78	0.79		0.2389	0.114	0.0018	0.0017	0.3766	0.0499	0.6084	0.315	0.0078	0.0041	0.0016	0.0005	0.9272	0.463	0.0624	0.0568	0.0603	0.0638		1.0616	0.7798	0.4809	1.2607	1.3231	0.6809	1.0909	1.0797	0.854
	631			lysylleucine	LC/MS pos early	40020			4682588		0.44	0.08	0.19	1.46	0.57	0.39	1.16	0.89	0.77		0.0075	0.0125	0.0004	0.0005	0.002	0.0009	0.125	0.1416	0.0682	0.0231	0.002	0.0006	0.6149	0.3715	0.0974	0.0773	0.3148	0.1667		0.6968	0.3074	0.0588	0.9754	1.4288	0.5601	1.3385	1.5536	1.1895
	660			phenylalanylalanine	LC/MS pos early	41374			6993123;5488196		0.71	0.32	0.45	1.08	0.56	0.52	0.98	0.79	0.8		0.1704	0.0895	0.0001	0.0003	0.0411	0.0089	0.4686	0.2762	0.0095	0.0047	0.002	0.0006	0.8533	0.4411	0.0503	0.0495	0.068	0.0675		0.7567	0.5409	0.2445	1.0167	1.1002	0.5702	2.2337	2.1886	1.7561
	664			phenylalanylglycine	LC/MS pos early	41370			98207		0.64	0.19	0.29	1.08	0.55	0.51	1.06	0.7	0.66		0.0806	0.0534	2.3174e-06	3.0509e-05	0.0067	0.0021	0.4559	0.2718	0.0049	0.0029	0.0002	0.0002	0.4782	0.3236	0.0058	0.0148	0.0003	0.0105		1.0982	0.7062	0.2066	0.9106	0.982	0.5039	1.4426	1.5239	1.0133
	681			prolylglycine	LC/MS pos early	40703			7408076;6426709		0.46	0.31	0.68	0.99	0.5	0.51	1.43	0.91	0.64		0.0103	0.0153	1.2869e-05	7.9048e-05	0.1072	0.0186	0.9801	0.4068	0.002	0.0017	0.001	0.0004	0.0086	0.03	0.3688	0.1937	0.0013	0.0141		0.8305	0.3839	0.2592	1.1871	1.1766	0.5992	1.1684	1.6766	1.065
	721			threonylphenylalanine	LC/MS neg	31530			4099799;4099798		0.63	0.09	0.14	1.07	0.26	0.24	0.92	0.85	0.93		0.163	0.0868	3.8072e-05	0.0001	0.0126	0.0035	0.5818	0.3074	0.0033	0.0022	0.0002	0.0002	0.5159	0.3401	0.3454	0.187	0.662	0.2691		1.4953	0.9444	0.1366	1.6943	1.8149	0.435	0.9914	0.9109	0.8444
	730			tryptophylglycine	LC/MS pos early	43028			263471		0.71	0.2	0.28	1.13	0.55	0.49	1	0.69	0.69		0.1109	0.0668	5.8666e-05	0.0002	0.0016	0.0008	0.3197	0.2292	0.0325	0.0124	0.0204	0.0033	0.9874	0.4781	0.0142	0.0239	0.0122	0.0293		0.939	0.6676	0.1884	0.8654	0.9762	0.4784	1.7784	1.7748	1.2261
	745			tyrosylglycine	LC/MS neg	41375			259323		0.65	0.18	0.28	1.14	0.56	0.49	1.2	0.84	0.69		0.0252	0.0255	5.0234e-07	1.984e-05	0.0005	0.0004	0.3089	0.2246	0.0114	0.0054	0.0004	0.0003	0.0162	0.039	0.0273	0.0335	0.001	0.0141		1.038	0.6752	0.1873	0.946	1.0791	0.5315	1.481	1.7829	1.2381
	759			valylglutamine	LC/MS pos early	42079			5253209		0.7	0.22	0.31	1.18	0.51	0.43	1.03	0.89	0.86		0.2189	0.1076	0.0002	0.0003	0.0604	0.0118	0.241	0.1979	0.0077	0.0041	0.0012	0.0004	0.6956	0.3927	0.4139	0.2081	0.1481	0.1051		1.1797	0.8284	0.2565	1.8081	2.1361	0.9202	0.9784	1.0088	0.8713
	760			valylglycine	LC/MS pos early	40475			136487		0.83	0.28	0.34	0.79	0.39	0.5	1.11	1	0.9		0.3288	0.1457	0.0018	0.0017	0.1219	0.0205	0.0923	0.1232	0.0004	0.0008	6.0011e-05	9.9216e-05	0.2852	0.2295	0.9576	0.3721	0.1388	0.1006		1.2096	1.0028	0.3422	1.6283	1.2919	0.6396	0.9431	1.0483	0.9421
	763			valylleucine	LC/MS pos early	39994			352039		0.7	0.22	0.31	1.16	0.33	0.29	1.16	0.92	0.8		0.2096	0.105	1.6046e-05	7.9217e-05	0.0888	0.0162	0.3709	0.247	0.0042	0.0026	0.0006	0.0003	0.2414	0.2082	0.5165	0.2405	0.0664	0.0669		1.3247	0.9225	0.2885	1.8459	2.1488	0.617	0.9724	1.1279	0.897
	773			leucylglutamine*	LC/MS pos early	48189			4305457		0.71	0.33	0.47	1.03	0.41	0.4	1.26	0.97	0.77		0.2111	0.1052	6.6154e-05	0.0002	0.1568	0.0248	0.745	0.344	0.004	0.0026	0.0061	0.0013	0.2152	0.1933	0.8688	0.3483	0.1372	0.1		0.8581	0.6098	0.2848	1.1055	1.1346	0.4517	1.2981	1.6369	1.2535
	827	Carbohydrate	Glycolysis, Gluconeogenesis, and Pyruvate Metabolism	fructose-6-phosphate	LC/MS polar	12021	C05345	HMDB00124	69507		5.18	0.65	0.13	0.4	0.26	0.65	0.71	0.88	1.24		0.3176	0.142	0.1867	0.063	0.1839	0.0285	0.1278	0.144	0.0369	0.0137	0.5843	0.0585	0.1068	0.1233	0.354	0.1884	0.3153	0.1667		0.1858	0.9626	0.1209	2.0565	0.8223	0.5341	1.2424	0.8844	1.0967
	830			Isobar: fructose 1,6-diphosphate, glucose 1,6-diphosphate, myo-inositol 1,4 or 1,3-diphosphate	LC/MS neg	46896					0.7	0.85	1.21	0.44	0.25	0.55	1.09	1.23	1.13		0.1845	0.0954	0.5048	0.1338	0.2392	0.0342	0.0048	0.0268	0.0001	0.0005	0.021	0.0034	0.5739	0.3571	0.3328	0.1814	0.5342	0.2354		1.2593	0.8837	1.0657	11.6882	5.1818	2.8689	0.1785	0.1951	0.22
	832			dihydroxyacetone phosphate (DHAP)	LC/MS pos early	15522	C00111	HMDB01473	668		0.5	1.03	2.06	0.76	0.49	0.65	0.85	1.13	1.33		0.0563	0.0431	0.6034	0.1536	0.0526	0.0107	0.0627	0.0982	0.0005	0.0009	0.0194	0.0032	0.4493	0.3091	0.532	0.2455	0.2282	0.1352		1.0162	0.5094	1.0469	2.9234	2.2163	1.4409	0.0226	0.0192	0.0255
	837			3-phosphoglycerate	LC/MS neg	1414	C00597	HMDB00807	724		1.18	8.05	6.85	1.19	3.63	3.04	0.56	0.41	0.74		0.2734	0.127	0.0016	0.0015	0.0009	0.0006	0.6081	0.315	0.0023	0.0018	0.0059	0.0013	0.4833	0.3249	0.214	0.1353	0.3007	0.1626		0.3474	0.4083	2.7968	0.947	1.1316	3.4395	1.8843	1.0541	0.7811
	839			pyruvate	LC/MS polar	22250	C00022	HMDB00243	1060		0.75	4.39	5.83	0.97	0.92	0.94	1.29	0.97	0.75		0.0155	0.0194	3.6176e-06	3.8966e-05	3.7413e-07	7.3712e-06	0.999	0.4124	0.7116	0.1718	0.4832	0.0493	0.0136	0.0356	0.6861	0.2963	0.0045	0.0238		0.6748	0.5083	2.965	1.6017	1.557	1.4705	0.7806	1.0091	0.7574
	840			lactate	LC/MS neg	527	C00186	HMDB00190	612		0.53	0.45	0.84	0.89	0.34	0.39	0.87	0.68	0.78		0.0026	0.0072	0.0011	0.0011	0.1941	0.0295	0.3415	0.2334	3.2642e-05	0.0003	0.0005	0.0003	0.2812	0.2271	0.0211	0.0296	0.0374	0.0527		1.5709	0.8387	0.7033	2.1528	1.9178	0.7407	1.1059	0.9664	0.754
	843			glycerate	LC/MS polar	1572	C00258	HMDB00139	752		0.65	1.85	2.84	1.24	1.88	1.52	1.16	1.08	0.93		0.0173	0.0197	0.0002	0.0003	0.0005	0.0004	0.2168	0.1878	0.0187	0.008	0.0095	0.0018	0.0222	0.0475	0.1339	0.0958	0.2044	0.1263		0.4233	0.2755	0.7837	0.7698	0.9557	1.4479	1.0881	1.2622	1.1728
	846		Pentose Phosphate Pathway	6-phosphogluconate	LC/MS neg	15442	C00345	HMDB01316	91493		3.33	0.77	0.23	0.85	0.46	0.54	1.75	1.3	0.74		0.0517	0.0416	0.1817	0.0619	0.0355	0.0079	0.4545	0.2718	0.0036	0.0024	0.0507	0.007	0.0331	0.06	0.2632	0.1561	0.1315	0.0981		0.4693	1.5611	0.3622	2.2841	1.9415	1.0401	0.6172	1.0794	0.8025
	849			ribose 1-phosphate	LC/MS polar	1763	C00620	HMDB01489	439236		0.84	1	1.18	0.78	0.38	0.49	0.87	0.6	0.68		0.4802	0.1913	0.8095	0.1899	0.3827	0.0504	0.2393	0.1978	0.0004	0.0008	0.0439	0.0063	0.5437	0.35	0.0548	0.0522	0.2483	0.1412		0.859	0.7246	0.8578	1.4755	1.1473	0.5625	1.4776	1.2896	0.8825
	850			5-phosphoribosyl diphosphate (PRPP)	LC/MS neg	36840	C00119	HMDB00280	7339		1	1.9	1.9	0.82	1.91	2.35	0.9	0.82	0.91		---	---	0.0588	0.0248	0.0588	0.0116	0.3322	0.2301	0.0109	0.0052	0.0016	0.0005	0.6672	0.3864	0.394	0.2012	0.5243	0.2329		0.2584	0.2584	0.4904	0.3974	0.3241	0.7604	2.5492	2.3002	2.096
	851			sedoheptulose-7-phosphate	LC/MS neg	35649	C05382	HMDB01068	616		1.07	1.31	1.23	0.84	1.56	1.85	3.32	4.37	1.32		0.8866	0.2779	0.0136	0.0076	0.3264	0.0446	0.1219	0.1404	0.0052	0.003	3.7619e-05	8.1123e-05	0.0011	0.0108	0.0005	0.004	0.1341	0.0992		0.5387	0.577	0.7072	1.1723	0.9878	1.8264	0.4722	1.5675	2.0639
	857		Pentose Metabolism	ribose	LC/MS polar	1471	C00121	HMDB00283	5779		0.76	1.13	1.49	0.59	0.42	0.72	0.81	0.66	0.82		0.1789	0.093	0.1449	0.0517	0.0918	0.0165	0.0108	0.038	2.2604e-05	0.0002	0.0624	0.0085	0.3414	0.2569	0.0861	0.0712	0.4089	0.1951		1.1583	0.8758	1.3082	2.3221	1.3637	0.9767	0.5717	0.461	0.3766
	858			ribitol	LC/MS polar	15772	C00474	HMDB00508	6912		0.83	1.17	1.41	1.11	1.47	1.33	2.5	2.93	1.17		0.0699	0.0484	0.082	0.0328	0.0048	0.0016	0.1233	0.1404	0.0082	0.0043	0.0298	0.0045	4.5626e-05	0.0039	6.9138e-05	0.0014	0.1739	0.1143		0.7627	0.634	0.8934	1.0543	1.1695	1.5547	0.4322	1.0824	1.2647
	859			ribonate	LC/MS polar	27731	C01685	HMDB00867	5460677		0.85	0.73	0.86	1.02	0.88	0.87	1.43	1.36	0.95		0.0956	0.0601	0.0031	0.0025	0.1219	0.0205	0.7122	0.339	0.2961	0.0809	0.2212	0.0252	0.028	0.0546	0.0219	0.0303	0.7092	0.2822		0.4712	0.3998	0.3431	1.0843	1.1067	0.9587	0.8865	1.2712	1.2083
	880			arabitol/xylitol	LC/MS polar	48885					1.66	1.58	0.95	1.13	1.64	1.45	1.08	0.95	0.87		0.0002	0.005	0.0061	0.0041	0.5801	0.0695	0.3959	0.254	0.0079	0.0041	0.0192	0.0032	0.501	0.332	0.7517	0.3159	0.1118	0.0896		0.6078	1.0099	0.9616	1.2949	1.4672	2.1282	0.902	0.9762	0.8541
	882			arabonate/xylonate	LC/MS polar	48255					1.13	1.15	1.02	0.84	0.69	0.82	0.74	0.46	0.62		0.843	0.2674	0.0831	0.0332	0.7123	0.0827	0.5823	0.3074	0.2476	0.07	0.3397	0.0369	0.2719	0.2238	0.0116	0.0211	0.2382	0.138		0.7078	0.8004	0.8136	1.5714	1.3187	1.0866	2.0324	1.4986	0.9261
	927		Fructose, Mannose and Galactose Metabolism	fructose	LC/MS polar	577	C00095	HMDB00660	5984		1.15	2.32	2.02	1.07	2.36	2.2	0.94	1	1.06		0.4819	0.1913	0.0004	0.0005	0.0064	0.002	0.6847	0.3324	0.0011	0.0012	0.0025	0.0007	0.8059	0.4266	0.8923	0.3538	0.6219	0.2614		0.6997	0.8025	1.6229	1.2445	1.3351	2.9409	0.7324	0.6865	0.7297
	932			mannitol/sorbitol	LC/MS polar	46142	C01507	HMDB00247	5780		1.12	1.31	1.17	1.33	2.14	1.61	1.2	1	0.84		0.208	0.1048	0.0133	0.0074	0.0419	0.0089	0.0004	0.0105	0.0009	0.0011	0.0035	0.0009	0.1589	0.1578	0.9425	0.3684	0.1225	0.0943		1.0065	1.1251	1.3203	0.7897	1.0502	1.6908	0.7394	0.8864	0.7424
	943			galactitol (dulcitol)	LC/MS polar	1117	C01697	HMDB00107	11850		0.96	1.46	1.51	1.13	0.99	0.88	1.2	0.84	0.7		0.7632	0.252	0.0119	0.0069	0.0017	0.0008	0.3228	0.2292	0.8422	0.1986	0.3545	0.0382	0.291	0.2335	0.4597	0.2223	0.0241	0.0414		1.079	1.0388	1.5723	1.1051	1.2475	1.0922	0.6451	0.7748	0.5424
	955		Nucleotide Sugar	UDP-glucose	LC/MS polar	32344	C00029	HMDB00286	8629		0.4	0.01	0.02	1.11	0.22	0.2	0.56	0.47	0.83		0.0007	0.005	0.0017	0.0016	0.0032	0.0012	0.421	0.2622	0.0008	0.0011	0.0004	0.0003	0.0191	0.0431	0.0007	0.0049	0.3841	0.1881		0.6629	0.2662	0.0051	1.0962	1.2175	0.2381	3.7351	2.1097	1.7586
	959			UDP-galactose	LC/MS polar	15860	C00052	HMDB00302	18068		0.53	0.12	0.22	1.08	0.31	0.28	0.64	0.52	0.81		0.0106	0.0153	2.7833e-05	0.0001	4.1715e-05	0.0001	0.6773	0.3318	0.0007	0.0011	0.0005	0.0003	0.0649	0.0883	0.0016	0.0071	0.4291	0.2032		1.0784	0.5683	0.1259	1.0183	1.1034	0.3144	3.2864	2.1009	1.7105
	960			UDP-glucuronate	LC/MS neg	2763	C00167	HMDB00935	17473		2.54	1.2	0.47	1.13	0.76	0.67	1.46	1.69	1.16		0.0008	0.005	0.2127	0.0683	0.0022	0.0009	0.2383	0.1978	0.0538	0.0189	0.0061	0.0013	0.078	0.0995	0.0233	0.032	0.312	0.1663		0.6299	1.603	0.7559	1.6886	1.9113	1.2879	0.5799	0.8439	0.9798
	962			guanosine 5'-diphospho-fucose	LC/MS neg	15903					0.7	1.66	2.38	0.71	1.33	1.88	0.96	0.72	0.74		0.0196	0.0216	0.0024	0.0021	0.0004	0.0003	0.0306	0.0628	0.0013	0.0013	0.0043	0.001	0.7423	0.4068	0.0422	0.0448	0.0546	0.0607		0.9159	0.6411	1.5231	2.215	1.5706	2.9558	0.8353	0.8027	0.5976
	964			UDP-N-acetylglucosamine	LC/MS polar	35162	C00043	HMDB00290	445675		0.59	0.28	0.47	1.02	0.4	0.39	0.82	0.62	0.76		0.0065	0.0119	7.0221e-05	0.0002	0.0003	0.0003	0.8128	0.36	0.0031	0.0022	0.0031	0.0008	0.3047	0.24	0.0301	0.0359	0.0974	0.0845		1.5344	0.9022	0.4244	1.0085	1.0262	0.4015	1.7856	1.4665	1.1131
	965			UDP-N-acetylgalactosamine	LC/MS polar	18396	C00203	HMDB00304	439185		0.76	0.54	0.71	0.96	0.47	0.49	0.72	0.6	0.82		0.096	0.0601	0.0048	0.0033	0.0131	0.0036	0.7004	0.337	0.0012	0.0013	0.0036	0.0009	0.1327	0.1399	0.0157	0.0248	0.3408	0.1753		1.035	0.7917	0.562	1.141	1.0973	0.5393	1.6721	1.2101	0.9949
	967			cytidine 5'-monophospho-N-acetylneuraminic acid	LC/MS polar	36831	C00128	HMDB01176	448209		0.79	0.53	0.67	1.03	0.71	0.69	1.18	1.07	0.91		0.1208	0.0704	0.0045	0.0032	0.0124	0.0035	0.7145	0.339	0.0116	0.0054	0.0024	0.0007	0.3897	0.2802	0.5309	0.2455	0.6405	0.2664		1.6307	1.2918	0.8598	0.8875	0.9139	0.6308	1.071	1.2652	1.1487
	973		Aminosugar Metabolism	glucosamine-6-phosphate	LC/MS polar	580	C00352	HMDB01254	439217		10.65	1.56	0.15	0.27	0.43	1.6	1	1	1		0.4973	0.1931	0.4165	0.115	0.7114	0.0827	0.0166	0.0447	0.0018	0.0016	0.1659	0.0201	---	---	---	---	---	---		0.0566	0.6028	0.0882	2.68	0.7203	1.1539	0.0418	0.0418	0.0418
	977			glucuronate	LC/MS polar	15443	C00191	HMDB00127	444791		1.49	0.52	0.35	0.82	0.38	0.46	0.93	0.73	0.78		0.0006	0.005	5.5772e-05	0.0001	3.0952e-06	2.0642e-05	0.0802	0.1119	0.0034	0.0023	0.0103	0.002	0.6251	0.3726	0.0608	0.056	0.0117	0.0293		0.8107	1.211	0.4208	1.2258	1.0014	0.4601	1.3675	1.2707	0.9968
	981			N-acetylglucosamine 6-phosphate	LC/MS polar	15107	C00357	HMDB02817	439219		1.13	1.57	1.39	0.8	0.89	1.11	0.61	0.53	0.87		0.6341	0.2241	0.0856	0.0338	0.1491	0.0239	0.245	0.1999	0.2994	0.0814	0.4798	0.0491	0.0334	0.06	0.0103	0.0205	0.449	0.2105		0.7571	0.8592	1.19	1.6861	1.3477	1.4985	0.8197	0.5001	0.434
	982			N-acetyl-glucosamine 1-phosphate	LC/MS polar	15741	C04256	HMDB01367	440364		1.2	4.6	3.83	1.09	2.33	2.14	1	0.7	0.7		0.3884	0.1661	2.6159e-05	0.0001	0.0012	0.0006	0.6058	0.315	0.0005	0.0008	0.0026	0.0007	0.9496	0.4677	0.0545	0.0522	0.1072	0.088		0.9756	1.1731	4.4925	1.1164	1.2172	2.6057	0.6402	0.6408	0.45
	988			N-acetylneuraminate	LC/MS polar	32377	C00270	HMDB00230	439197		0.98	1.74	1.77	1.08	1.26	1.17	1.06	0.76	0.72		0.7626	0.252	5.3536e-05	0.0001	0.0002	0.0002	0.2606	0.2054	0.0137	0.0062	0.0402	0.0058	0.5559	0.3537	0.0344	0.0392	0.008	0.0271		1.0256	1.0063	1.7858	1.0364	1.1152	1.3069	0.5937	0.6275	0.4533
	999			N-acetylglucosaminylasparagine	LC/MS pos early	48149	C04540	HMDB00489	123826		0.81	1.04	1.28	0.83	0.86	1.03	0.82	0.77	0.93		0.2537	0.1198	0.7007	0.1715	0.123	0.0206	0.2109	0.1865	0.2843	0.0786	0.7027	0.0689	0.3269	0.2507	0.1899	0.122	0.5417	0.2367		0.816	0.6646	0.8522	1.2206	1.0151	1.0442	1.4307	1.1776	1.0966
	1000			erythronate*	LC/MS polar	42420		HMDB00613	2781043		0.95	1.19	1.25	1.04	1.25	1.2	1.45	1.15	0.8		0.701	0.2398	0.1241	0.0465	0.0194	0.0051	0.6666	0.3295	0.0793	0.0262	0.0672	0.009	0.037	0.0638	0.2667	0.1568	0.0079	0.0271		0.6072	0.5783	0.72	1.148	1.1891	1.4305	0.8809	1.2751	1.0149
	1002			N-acetylglucosamine/N-acetylgalactosamine	LC/MS pos early	46539					1.97	1.85	0.94	0.9	1.75	1.94	0.99	0.8	0.81		0.0019	0.0065	0.0015	0.0015	0.6504	0.077	0.2736	0.2111	0.0028	0.002	0.0011	0.0004	0.9163	0.462	0.1259	0.0917	0.2195	0.1317		0.8157	1.6076	1.5078	1.096	0.9884	1.9142	0.8112	0.8052	0.6487
	1007	Energy	TCA Cycle	citrate	LC/MS neg	1564	C00158	HMDB00094	311		1.69	0.78	0.46	1.05	0.63	0.6	1.38	1.35	0.98		0.9291	0.2879	0.2041	0.0659	0.6397	0.0759	0.5342	0.2966	0.0004	0.0008	0.0006	0.0003	0.0114	0.0342	0.0037	0.0115	0.825	0.3116		0.6365	1.0764	0.4962	1.6112	1.6964	1.0166	0.8589	1.1839	1.1568
	1009			aconitate [cis or trans]	LC/MS neg	46173	C00417	HMDB00072			1.86	0.75	0.4	1.26	0.69	0.55	1.14	1.01	0.89		0.6842	0.2356	0.0155	0.0084	0.3719	0.0494	0.0901	0.1209	0.0134	0.0061	0.001	0.0004	0.1865	0.173	0.8183	0.3368	0.2039	0.1263		1.1623	2.1594	0.8702	0.8747	1.0985	0.6012	1.0462	1.1919	1.0588
	1012			alpha-ketoglutarate	LC/MS polar	528	C00026	HMDB00208	51		0.8	0.92	1.15	1.2	0.88	0.73	1.28	0.95	0.74		0.0658	0.0465	0.4325	0.1186	0.035	0.0078	0.0675	0.1026	0.2362	0.0675	0.0119	0.0022	0.0288	0.0557	0.6062	0.2723	0.0069	0.0257		1.0923	0.8724	1.0056	1.1567	1.3914	1.0194	0.8697	1.1175	0.8248
	1014			succinylcarnitine	LC/MS pos early	37058					0.4	0.14	0.34	0.92	0.07	0.08	0.78	0.64	0.82		0.001	0.005	0.0004	0.0005	0.0005	0.0003	0.4738	0.2764	0.0068	0.0037	0.0082	0.0016	0.0656	0.0886	0.0095	0.0198	0.011	0.0293		0.2985	0.12	0.0408	1.5241	1.3993	0.1119	1.3875	1.0785	0.8888
	1015			succinate	LC/MS neg	1437	C00042	HMDB00254	1110		2.27	0.59	0.26	1.5	1.07	0.71	1.97	1.62	0.82		0.5926	0.2141	0.0107	0.0064	0.217	0.0319	0.0176	0.0465	0.5159	0.1285	0.0027	0.0008	0.0002	0.0064	0.0011	0.0061	0.0382	0.0527		0.5111	1.1586	0.3021	0.8678	1.3055	0.9273	1.1552	2.2703	1.8698
	1016			fumarate	LC/MS polar	1643	C00122	HMDB00134	444972		0.87	0.24	0.28	1.18	0.41	0.35	1.03	0.68	0.66		0.1754	0.0916	2.2815e-05	9.6543e-05	2.9921e-05	8.3365e-05	0.1102	0.1344	0.0092	0.0046	0.0029	0.0008	0.7899	0.4199	0.0244	0.0327	0.0098	0.0293		1.1937	1.04	0.2869	0.9269	1.0962	0.3793	1.3981	1.4422	0.9494
	1017			malate	LC/MS polar	1303	C00149	HMDB00156	525		0.89	0.38	0.43	1.1	0.51	0.46	0.95	0.75	0.79		0.2921	0.1331	0.0001	0.0002	0.0003	0.0003	0.3838	0.2516	0.0037	0.0025	0.0016	0.0005	0.6194	0.3715	0.0069	0.0158	0.09	0.0803		1.0367	0.9245	0.3943	1.0489	1.1497	0.5346	1.2774	1.2185	0.959
	1027			2-methylcitrate/homocitrate	LC/MS neg	52282					0.5	0.26	0.52	0.89	0.17	0.19	0.9	0.69	0.76		0.0055	0.0113	1.586e-05	7.9217e-05	0.0109	0.0031	0.33	0.2298	0.0044	0.0027	0.0062	0.0013	0.3288	0.2512	0.0156	0.0248	0.0306	0.0484		1.8844	0.9375	0.4921	0.4009	0.3578	0.0668	5.8185	5.2436	3.9971
	1028		Oxidative Phosphorylation	acetylphosphate	LC/MS polar	15488	C00227	HMDB01494	186		0.65	1.11	1.69	0.81	1.44	1.78	0.78	0.71	0.91		0.1625	0.0868	0.4861	0.1298	0.0785	0.0145	0.3846	0.2516	0.066	0.0225	0.0483	0.0068	0.3002	0.2386	0.1217	0.0902	0.832	0.3121		0.9669	0.6307	1.0686	1.1378	0.9191	1.6398	1.1763	0.9125	0.8348
	1030			phosphate	LC/MS neg	42109	C00009	HMDB01429	1061		0.93	1.23	1.32	1	1.06	1.07	0.99	0.79	0.79		0.559	0.2081	0.0562	0.0243	0.0755	0.0141	0.9528	0.4	0.3503	0.0925	0.3773	0.0404	0.9528	0.4677	0.0815	0.069	0.1026	0.087		0.8171	0.7582	1.0037	1.1284	1.1249	1.2009	1.0595	1.0526	0.8329
	1036	Lipid	Medium Chain Fatty Acid	caprate (10:0)	LC/MS neg	1642	C01571	HMDB00511	2969		0.93	1	1.08	0.91	1.42	1.55	1.02	0.85	0.84		0.4688	0.1889	0.9273	0.2106	0.4164	0.053	0.3388	0.2327	0.0013	0.0013	0.0061	0.0013	0.8257	0.4326	0.2091	0.1334	0.037	0.0527		1.0005	0.9325	1.0053	0.9681	0.8835	1.3726	1.0877	1.1051	0.9284
	1039			laurate (12:0)	LC/MS neg	1645	C02679	HMDB00638	3893		1.31	1.63	1.24	0.93	1.46	1.57	1.48	1.34	0.9		0.0598	0.0442	0.0553	0.024	0.3451	0.0469	0.5359	0.2966	0.0084	0.0044	0.0086	0.0017	0.0127	0.0352	0.0383	0.0425	0.2399	0.1384		1.1335	1.4851	1.8475	0.7146	0.6631	1.0434	0.7305	1.0822	0.9775
	1040			5-dodecenoate (12:1n7)	LC/MS neg	33968		HMDB00529	5312378		0.87	1.06	1.22	0.65	2.53	3.9	1.51	1.12	0.75		0.1342	0.0761	0.3771	0.1066	0.0018	0.0008	0.0156	0.0441	0.0024	0.0019	0.0004	0.0003	0.052	0.0818	0.3867	0.1994	0.0364	0.0527		1.2006	1.045	1.2782	0.6796	0.4409	1.7201	0.7081	1.0672	0.7954
	1042		Long Chain Fatty Acid	myristate (14:0)	LC/MS neg	1365	C06424	HMDB00806	11005		1.4	1.47	1.05	0.97	2.03	2.08	1.37	1.27	0.93		0.3352	0.1477	0.1033	0.04	0.6564	0.0774	0.7988	0.3578	0.0009	0.0011	0.0064	0.0013	0.0719	0.0936	0.1171	0.0883	0.4873	0.2207		0.9476	1.3265	1.3894	0.5001	0.4875	1.0156	0.8129	1.1127	1.031
	1043			myristoleate (14:1n5)	LC/MS neg	32418	C08322	HMDB02000	5281119		1.33	1.81	1.36	0.72	3.48	4.86	1.65	1.22	0.74		0.1386	0.0772	0.0116	0.0069	0.0686	0.0131	0.0637	0.0982	0.0007	0.0011	0.0002	0.0002	0.0333	0.06	0.22	0.1378	0.0611	0.0638		0.6394	0.8527	1.1578	0.5837	0.4183	2.0331	0.8963	1.4794	1.0944
	1044			pentadecanoate (15:0)	LC/MS neg	1361	C16537	HMDB00826	13849		1.09	1.32	1.2	1.03	1.75	1.7	1.04	0.92	0.89		0.8941	0.2792	0.2008	0.0657	0.378	0.05	0.942	0.3986	0.0003	0.0008	0.0391	0.0057	0.7876	0.4195	0.6126	0.2737	0.3891	0.1895		0.8332	0.9107	1.0959	0.6459	0.6668	1.1325	1.1054	1.1475	1.0209
	1045			palmitate (16:0)	LC/MS neg	1336	C00249	HMDB00220	985		1.24	1.25	1	0.96	1.52	1.58	1.08	0.93	0.87		0.5185	0.1991	0.2352	0.0747	0.7791	0.0894	0.7169	0.339	0.0073	0.0039	0.039	0.0057	0.5601	0.3537	0.7903	0.3266	0.1233	0.0943		0.9793	1.2184	1.2237	0.8385	0.8055	1.2747	0.9542	1.0266	0.8885
	1046			palmitoleate (16:1n7)	LC/MS neg	33447	C08362	HMDB03229	445638		0.9	1.19	1.32	0.97	2.52	2.61	1.19	1.1	0.92		0.7368	0.2482	0.3582	0.1025	0.2348	0.0339	0.679	0.3318	0.0014	0.0014	0.0013	0.0005	0.3643	0.2686	0.4451	0.2178	0.6971	0.2793		1.2695	1.1421	1.5097	0.9273	0.8972	2.3373	0.889	1.0616	0.9767
	1048			margarate (17:0)	LC/MS neg	1121		HMDB02259	10465		1.33	1.65	1.24	0.92	2.4	2.61	0.99	0.9	0.91		0.5116	0.1973	0.084	0.0333	0.3618	0.0485	0.4833	0.2803	0.0012	0.0013	0.0028	0.0008	0.9503	0.4677	0.6788	0.2945	0.4855	0.2204		0.7691	1.0267	1.2704	0.9076	0.8339	2.1755	1.1067	1.097	0.995
	1049			10-heptadecenoate (17:1n7)	LC/MS neg	33971		HMDB60038	5312435		0.91	1.46	1.61	0.86	2.68	3.12	0.99	0.94	0.94		0.7906	0.2563	0.1599	0.0556	0.1215	0.0205	0.2823	0.2154	0.001	0.0012	0.001	0.0004	0.8972	0.4551	0.5842	0.2648	0.772	0.2983		1.1094	1.0086	1.6247	0.9649	0.8276	2.5822	0.9951	0.9901	0.9344
	1050			stearate (18:0)	LC/MS neg	1358	C01530	HMDB00827	5281		1.29	1.3	1.01	0.97	1.34	1.37	0.87	0.7	0.8		0.4867	0.1928	0.1848	0.0625	0.764	0.088	0.7706	0.3499	0.0259	0.0105	0.1023	0.0131	0.4874	0.3264	0.0912	0.0745	0.0316	0.049		0.7333	0.9486	0.9569	1.2707	1.2386	1.6975	1.0315	0.8974	0.7205
	1058			nonadecanoate (19:0)	LC/MS neg	1356	C16535	HMDB00772	12591		1.24	1.63	1.31	0.93	2.4	2.57	0.94	0.8	0.85		0.5667	0.2095	0.1185	0.045	0.2661	0.0375	0.5933	0.3094	0.0001	0.0005	0.0059	0.0013	0.8162	0.4294	0.2945	0.1655	0.2435	0.1397		0.6933	0.8576	1.1274	0.9072	0.8482	2.1807	1.0978	1.0307	0.8796
	1059			10-nonadecenoate (19:1n9)	LC/MS neg	33972		HMDB13622	5312513		1.17	1.26	1.08	0.94	1.64	1.75	0.75	0.67	0.89		0.724	0.2456	0.2935	0.0896	0.5757	0.0693	0.5522	0.3014	0.0018	0.0016	0.02	0.0033	0.0967	0.1159	0.0181	0.0265	0.4385	0.2061		0.9376	1.0931	1.1854	1.1974	1.1225	1.9645	0.8915	0.6717	0.5966
	1061			arachidate (20:0)	LC/MS neg	1118	C06425	HMDB02212	10467		1.78	0.97	0.55	0.98	1.2	1.22	0.93	0.82	0.88		0.1792	0.093	0.9252	0.2106	0.1648	0.0258	0.8081	0.3594	0.11	0.0349	0.2162	0.0249	0.6559	0.384	0.1892	0.1219	0.3387	0.1753		0.727	1.2912	0.7061	1.8154	1.7831	2.1841	1.0394	0.9695	0.855
	1064			eicosenoate (20:1)	LC/MS neg	33587		HMDB02231	5282768		1.4	1.03	0.74	1.09	1.24	1.14	0.8	0.66	0.82		0.4557	0.1854	0.713	0.1731	0.5484	0.0674	0.7702	0.3499	0.0042	0.0026	0.3644	0.0392	0.2424	0.2082	0.0302	0.0359	0.2803	0.1543		0.9567	1.3349	0.9819	1.5639	1.7083	1.9462	0.5089	0.4086	0.3353
	1067			behenate (22:0)*	LC/MS neg	12125	C08281	HMDB00944	8215		1.35	0.76	0.56	1.12	1.21	1.09	1	0.92	0.92		0.4906	0.1931	0.4348	0.119	0.1912	0.0291	0.8052	0.3589	0.0285	0.0112	0.5232	0.053	0.9569	0.4677	0.6768	0.2945	0.59	0.2533		1.0454	1.4142	0.7893	1.1317	1.262	1.3734	0.904	0.9082	0.8334
	1068			erucate (22:1n9)	LC/MS neg	1552	C08316	HMDB02068	5281116		1.35	1.08	0.8	0.93	1.41	1.52	0.93	0.89	0.96		0.4953	0.1931	0.5984	0.1528	0.7036	0.0822	0.6406	0.3217	0.0433	0.0154	0.0472	0.0067	0.62	0.3715	0.4022	0.2048	0.9029	0.3284		0.9213	1.2434	0.9916	1.6528	1.5344	2.3298	0.2976	0.2757	0.2642
	1071			nervonate (24:1n9)*	LC/MS neg	52674	C08323	HMDB02368	5281120		1.09	0.95	0.88	1.06	0.91	0.86	1.1	1.03	0.94		0.8907	0.2787	0.8666	0.1997	0.9797	0.1088	0.9507	0.4	0.319	0.0859	0.6103	0.0604	0.662	0.3856	0.7082	0.3013	0.833	0.3121		1.3676	1.4856	1.3031	1.1753	1.2493	1.0723	0.3481	0.3814	0.3593
	1075			oleate/vaccenate (18:1)	LC/MS neg	52285					1	1.31	1.3	0.94	1.4	1.5	0.92	0.78	0.85		0.9938	0.301	0.2282	0.0729	0.2369	0.0341	0.564	0.3044	0.0015	0.0014	0.0506	0.007	0.6694	0.3864	0.1711	0.1139	0.1769	0.1158		0.8634	0.8653	1.1284	1.2388	1.1612	1.7372	0.7265	0.67	0.5694
	1078		Polyunsaturated Fatty Acid (n3 and n6)	stearidonate (18:4n3)	LC/MS neg	33969	C16300	HMDB06547	5312508		1	2.54	2.55	0.84	4.37	5.22	1.2	1	0.83		0.9202	0.2857	0.012	0.0069	0.0215	0.0055	0.1614	0.1574	4.4802e-05	0.0003	2.6041e-05	7.1755e-05	0.2069	0.1865	0.8666	0.3483	0.361	0.1816		0.6103	0.609	1.5502	0.6803	0.5693	2.9741	1.1724	1.4122	1.1735
	1079			eicosapentaenoate (EPA; 20:5n3)	LC/MS neg	18467	C06428	HMDB01999	446284		0.85	1.81	2.12	0.8	2.05	2.57	0.58	0.56	0.96		0.6753	0.2345	0.0624	0.0259	0.0234	0.0059	0.1683	0.1627	0.0016	0.0015	0.001	0.0004	0.0177	0.041	0.0201	0.0283	0.8155	0.3087		0.8853	0.7537	1.6005	2.0464	1.6334	4.2022	0.6697	0.3905	0.3762
	1080			docosapentaenoate (n3 DPA; 22:5n3)	LC/MS neg	32504	C16513	HMDB01976	6441454		0.89	1.68	1.89	0.8	2.41	3	0.59	0.61	1.03		0.7605	0.252	0.0952	0.0374	0.0593	0.0117	0.1703	0.1639	0.0002	0.0006	0.001	0.0004	0.0129	0.0352	0.0438	0.0453	0.9699	0.3459		0.7387	0.6542	1.2381	2.6194	2.0985	6.3012	1.0009	0.5925	0.6111
	1081			docosahexaenoate (DHA; 22:6n3)	LC/MS neg	44675	C06429	HMDB02183	445580		0.79	1.4	1.78	0.78	2.78	3.56	0.66	0.69	1.06		0.5336	0.2024	0.192	0.0646	0.0683	0.0131	0.1079	0.1333	0.0001	0.0005	0.0002	0.0002	0.034	0.0604	0.0966	0.077	0.8751	0.3214		0.9448	0.7441	1.321	1.2839	1.0004	3.5659	1.034	0.6804	0.7181
	1085			linoleate (18:2n6)	LC/MS neg	1105	C01595	HMDB00673	5280450		0.82	1.27	1.55	0.98	2.41	2.45	0.86	0.76	0.88		0.5789	0.2116	0.2805	0.0869	0.1339	0.022	0.7606	0.3487	0.0009	0.0011	0.003	0.0008	0.2745	0.2245	0.0745	0.0643	0.4533	0.2114		1.4793	1.2132	1.8816	1.0459	1.0299	2.5188	0.8257	0.7078	0.6254
	1087			linolenate [alpha or gamma; (18:3n3 or 6)]	LC/MS neg	34035	C06426	HMDB03073	5280934		0.8	1.46	1.83	0.91	3.72	4.08	0.93	0.81	0.87		0.4884	0.193	0.1322	0.0483	0.0589	0.0116	0.4273	0.2622	0.0003	0.0008	0.0001	0.0002	0.526	0.3438	0.1228	0.0904	0.3687	0.1844		1.2583	1.0028	1.8376	0.9796	0.8924	3.64	1.0137	0.9436	0.8195
	1089			dihomo-linolenate (20:3n3 or n6)	LC/MS neg	35718	C03242	HMDB02925	5280581		0.87	1.21	1.39	0.84	1.26	1.51	0.74	0.72	0.98		0.6122	0.2174	0.3138	0.0944	0.197	0.0296	0.3049	0.224	0.0578	0.0202	0.0886	0.0116	0.0237	0.0488	0.088	0.0724	0.7576	0.2951		0.9309	0.8118	1.1272	1.8772	1.5712	2.3689	0.728	0.5365	0.5245
	1090			arachidonate (20:4n6)	LC/MS neg	1110	C00219	HMDB01043	444899		0.84	1.43	1.7	0.81	1.37	1.69	0.6	0.6	1		0.6718	0.2343	0.1677	0.0581	0.0766	0.0142	0.1792	0.1702	0.0077	0.0041	0.0179	0.003	0.0266	0.0529	0.0405	0.0439	0.9345	0.3386		0.8752	0.7387	1.2547	2.2026	1.7878	3.0195	0.6275	0.3789	0.3784
	1091			adrenate (22:4n6)	LC/MS neg	32980	C16527	HMDB02226	5497181		0.81	1.37	1.71	0.73	2.42	3.3	0.47	0.16	0.34		0.681	0.2355	0.372	0.1055	0.1801	0.028	0.1812	0.1712	0.0017	0.0016	0.0024	0.0007	0.7645	0.415	0.1428	0.1	0.0122	0.0293		0.5817	0.4688	0.7996	2.0404	1.4986	4.9417	2.599	1.2205	0.4172
	1093			docosadienoate (22:2n6)	LC/MS neg	32415	C16533	HMDB61714	5282807		0.92	1.24	1.35	0.98	1.46	1.49	0.75	0.59	0.79		0.7865	0.2563	0.3478	0.0998	0.2661	0.0375	0.7737	0.3506	0.0019	0.0016	0.055	0.0076	0.1487	0.1517	0.0044	0.0121	0.2999	0.1626		0.8399	0.7696	1.0373	1.6649	1.6369	2.4348	0.2569	0.1925	0.1523
	1094			dihomo-linoleate (20:2n6)	LC/MS neg	17805	C16525	HMDB05060	6439848		0.94	1.03	1.09	1.02	1.53	1.5	0.64	0.54	0.84		0.8644	0.2726	0.7092	0.1729	0.5778	0.0694	0.9573	0.4011	0.0015	0.0014	0.0457	0.0065	0.0341	0.0604	0.0031	0.0104	0.3831	0.1881		0.9954	0.9396	1.0225	1.3085	1.3351	2.0032	0.4132	0.2633	0.2212
	1096			mead acid (20:3n9)	LC/MS neg	35174		HMDB10378	5312531		0.69	1.17	1.7	0.89	1.53	1.71	0.51	0.36	0.72		0.2893	0.1322	0.4046	0.1128	0.0523	0.0107	0.3698	0.247	0.0011	0.0012	0.0169	0.0029	0.0074	0.0281	0.0002	0.0021	0.1059	0.0878		1.0259	0.7063	1.199	3.1704	2.8298	4.8512	0.5225	0.2643	0.1892
	1147		Fatty Acid, Branched	15-methylpalmitate	LC/MS neg	38768			17903417		1.22	1.03	0.84	0.89	1.64	1.84	0.96	0.88	0.92		0.6748	0.2345	0.7485	0.1799	0.7982	0.0909	0.4561	0.2718	0.0032	0.0022	0.028	0.0044	0.6952	0.3927	0.3019	0.1687	0.4884	0.2207		0.7336	0.8957	0.7544	0.9679	0.8611	1.5855	1.1751	1.1271	1.0369
	1150			17-methylstearate	LC/MS neg	38296			3083779		1.38	1.27	0.92	0.9	1.96	2.17	0.94	0.81	0.87		0.5001	0.1938	0.3078	0.0933	0.9143	0.1022	0.501	0.286	0.0009	0.0011	0.0143	0.0025	0.6205	0.3715	0.1032	0.0806	0.406	0.1943		0.7676	1.0593	0.9728	0.9361	0.8459	1.8367	1.2025	1.1247	0.9771
	1161		Fatty Acid, Dicarboxylate	2-hydroxyglutarate	LC/MS polar	37253	C02630	HMDB00606	43		0.73	0.47	0.65	1.39	0.24	0.17	1.96	1.68	0.86		0.0253	0.0255	0.0002	0.0004	0.008	0.0024	0.0028	0.0215	0.0067	0.0037	0.0043	0.001	0.0053	0.0234	0.0025	0.0093	0.3582	0.1812		1.3364	0.9736	0.6342	0.926	1.2868	0.2231	0.6263	1.2286	1.0543
	1164			2-hydroxyadipate	LC/MS polar	31934	C02360	HMDB00321	193530		0.82	0.36	0.43	2.04	0.45	0.22	1.33	1.1	0.83		0.0888	0.0571	5.2758e-05	0.0001	4.8995e-05	0.0001	0.3435	0.2334	0.2344	0.0671	0.082	0.0109	0.1293	0.138	0.4472	0.2178	0.2901	0.1583		6.7367	5.5321	2.3965	0.5322	1.0842	0.2375	0.6923	0.9208	0.7615
	1167			maleate	LC/MS polar	20676	C01384	HMDB00176	444266		0.81	0.33	0.4	1.06	0.38	0.35	1.2	0.86	0.72		0.1684	0.0888	8.7224e-05	0.0002	0.0011	0.0006	0.745	0.344	0.0002	0.0006	0.0007	0.0004	0.1714	0.1658	0.2341	0.1448	0.0135	0.031		1.2409	1.003	0.4043	1.0616	1.1294	0.3983	0.938	1.1215	0.8072
	1179			hexadecanedioate	LC/MS neg	35678	C19615	HMDB00672	10459		1.46	0.61	0.42	1.01	0.86	0.85	1.63	1.12	0.69		0.0563	0.0431	0.0168	0.0089	0.0024	0.001	0.9693	0.4031	0.2573	0.0726	0.3104	0.0341	0.0686	0.0917	0.3556	0.1887	0.1361	0.1		0.6163	0.8991	0.3748	1.1498	1.1657	0.9899	0.9729	1.5835	1.0877
	1213		Fatty Acid, Amino	6-aminocaproate	LC/MS pos early	20715	C02378	HMDB01901	564		1.99	2.38	1.2	1.86	1.69	0.9	0.79	0.61	0.77		0.0261	0.0261	0.0198	0.0103	0.5648	0.0685	9.2527e-05	0.0067	0.0244	0.01	0.4151	0.0433	0.056	0.0838	0.0027	0.0097	0.0613	0.0638		1.1767	2.3395	2.7967	0.8961	1.6696	1.5103	0.1204	0.0951	0.0731
	1227		Fatty Acid Synthesis	malonylcarnitine	LC/MS pos early	37059		HMDB02095	22833583		0.55	0.66	1.19	0.79	1.13	1.43	0.94	0.84	0.89		0.0071	0.0122	0.0139	0.0077	0.0726	0.0137	0.0306	0.0628	0.2905	0.0798	0.0126	0.0023	0.6819	0.3905	0.2667	0.1568	0.3477	0.1777		0.7565	0.4167	0.496	3.5098	2.7699	3.9597	1.1188	1.0526	0.9406
	1230		Fatty Acid Metabolism	acetyl CoA	LC/MS neg	43840	C00024	HMDB01206	444493		0.41	1.32	3.22	1.29	0.89	0.69	0.86	0.53	0.62		0.0083	0.0133	0.128	0.0478	0.0029	0.0011	0.4456	0.2692	0.4774	0.1202	0.2545	0.0284	0.4909	0.3279	0.0254	0.0327	0.0441	0.056		1.7956	0.734	2.3624	1.0974	1.4118	0.9791	1.0124	0.8671	0.5382
	1238			myristoyl CoA	LC/MS neg	36859	C02593	HMDB01521	65113		0.77	1.51	1.97	1.01	1.17	1.15	0.91	0.75	0.82		0.2069	0.1046	0.0119	0.0069	0.0249	0.0061	0.8657	0.3796	0.1999	0.0588	0.3846	0.041	0.8669	0.4441	0.3505	0.188	0.1832	0.1179		0.9976	0.7657	1.5067	0.6252	0.6333	0.7298	1.2653	1.1519	0.9491
	1241		Fatty Acid Metabolism (also BCAA Metabolism)	butyrylcarnitine	LC/MS pos early	32412	C02862	HMDB02013	439829		0.22	0.07	0.33	0.35	0.03	0.07	0.4	0.24	0.59		0.0118	0.0163	1.0544e-06	3.0509e-05	0.054	0.0109	0.0015	0.0188	0.0026	0.0019	0.0061	0.0013	0.057	0.0838	0.0112	0.0209	0.1643	0.1122		10.5684	2.3322	0.7675	12.3408	4.3053	0.3141	1.0008	0.3971	0.2362
	1244			propionylcarnitine	LC/MS pos early	32452	C03017	HMDB00824	107738		0.55	0.34	0.62	0.27	0.07	0.24	0.59	0.46	0.77		0.1401	0.0772	0.0013	0.0013	0.655	0.0774	0.0001	0.0067	0.0012	0.0013	0.0106	0.002	0.0664	0.0892	0.0152	0.0246	0.2189	0.1317		2.0825	1.139	0.707	6.5626	1.8028	0.4338	1.4049	0.8307	0.6421
	1258		Fatty Acid Metabolism(Acyl Carnitine)	acetylcarnitine	LC/MS pos early	32198	C02571	HMDB00201	1		0.33	3.34	10.19	0.32	0.45	1.39	0.47	0.34	0.72		0.0036	0.0092	0.0006	0.0007	0.0008	0.0005	0.0013	0.0171	0.0063	0.0035	0.172	0.0208	0.0578	0.0838	0.0198	0.0281	0.1832	0.1179		1.0947	0.3583	3.6509	5.6603	1.8272	2.537	0.3385	0.1579	0.1144
	1259			3-hydroxybutyrylcarnitine (1)	LC/MS pos early	43264		HMDB13127	53481617		0.41	4.14	10.11	0.92	1.81	1.97	1.6	1.32	0.82		0.0003	0.005	3.0803e-05	0.0001	3.1431e-06	2.0642e-05	0.2982	0.2213	0.0046	0.0028	0.0031	0.0008	0.0201	0.0446	0.0841	0.0701	0.1399	0.1008		0.7738	0.3169	3.203	1.463	1.3404	2.6448	0.573	0.9189	0.7549
	1260			3-hydroxybutyrylcarnitine (2)	LC/MS pos early	52984					0.21	1.82	8.58	0.72	0.52	0.71	1.36	0.94	0.69		1.6387e-05	0.0013	0.0026	0.0022	2.1159e-05	6.5825e-05	0.0055	0.0271	0.003	0.0021	0.0385	0.0057	0.1041	0.1207	0.7225	0.3063	0.0372	0.0527		1.1835	0.2507	2.1505	2.163	1.5649	1.1169	0.4714	0.6393	0.4415
	1262			hexanoylcarnitine	LC/MS pos late	32328		HMDB00705	6426853		0.16	0.05	0.31	0.29	0.04	0.14	0.5	0.29	0.58		0.0083	0.0133	1.4028e-05	7.9048e-05	0.0559	0.0112	0.0032	0.0241	8.5001e-05	0.0004	0.0013	0.0005	0.0299	0.0568	0.003	0.0103	0.0544	0.0607		3.8857	0.6274	0.1967	12.7408	3.7357	0.5329	1.6544	0.8207	0.4747
	1263			octanoylcarnitine	LC/MS pos late	33936	C02838	HMDB00791	123701		0.27	0.27	1	0.19	0.12	0.64	2.08	0.78	0.38		0.0013	0.0055	0.0013	0.0013	---	---	0.0065	0.0296	0.0023	0.0019	0.3152	0.0346	0.5587	0.3537	0.2935	0.1655	0.3119	0.1663		1.0678	0.2881	0.2881	4.4279	0.8341	0.5331	0.5131	1.0665	0.4012
	1268			laurylcarnitine	LC/MS pos late	34534		HMDB02250	10427569		0.56	0.19	0.34	0.48	0.21	0.43	0.83	0.69	0.83		0.0448	0.0374	0.0003	0.0004	0.0046	0.0016	0.0025	0.0208	0.0165	0.0071	0.0662	0.0089	0.2266	0.2007	0.0188	0.0271	0.2508	0.1423		1.2361	0.6869	0.2346	2.8092	1.3555	0.5797	1.1835	0.9819	0.8187
	1269			myristoylcarnitine	LC/MS pos late	33952		HMDB05066	53477791		0.48	0.23	0.48	0.53	0.21	0.39	0.76	0.65	0.85		0.0353	0.0326	0.0014	0.0014	0.0674	0.013	0.0053	0.0271	0.003	0.0021	0.0201	0.0033	0.1732	0.166	0.0513	0.0498	0.1889	0.1199		1.6416	0.7813	0.3773	1.9866	1.0554	0.4137	1.3703	1.0459	0.8937
	1271			palmitoylcarnitine	LC/MS pos late	44681	C02990	HMDB00222	461		0.45	0.18	0.41	0.58	0.15	0.25	0.66	0.56	0.85		0.0575	0.0432	0.0003	0.0004	0.0945	0.0169	0.0051	0.0271	0.004	0.0026	0.0124	0.0023	0.0578	0.0838	0.0188	0.0271	0.1371	0.1		1.3006	0.5898	0.2399	1.7694	1.0209	0.2599	1.6273	1.0719	0.9159
	1273			stearoylcarnitine	LC/MS pos late	34409		HMDB00848	6426855		0.4	0.06	0.15	0.74	0.09	0.12	0.63	0.57	0.9		0.0112	0.0157	1.2325e-05	7.9048e-05	0.002	0.0009	0.0134	0.0406	0.0043	0.0027	0.0054	0.0012	0.0387	0.0655	0.0241	0.0326	0.4319	0.204		2.8465	1.1332	0.1755	2.6504	1.9561	0.2257	1.441	0.9096	0.8196
	1274			linoleoylcarnitine*	LC/MS pos late	46223		HMDB06469	6450015		0.12	0.38	3.1	1.26	0.74	0.59	1.09	0.63	0.58		0.0039	0.0097	0.0567	0.0243	0.0066	0.0021	0.412	0.2604	0.9713	0.2224	0.0349	0.0052	0.777	0.4173	0.068	0.0606	0.0701	0.0688		1.5876	0.1948	0.6032	1.2284	1.549	0.9064	1.396	1.5186	0.8843
	1275			oleoylcarnitine	LC/MS pos late	35160		HMDB05065	6441392;53477789		0.34	0.4	1.19	0.56	0.24	0.44	1.03	0.68	0.66		0.0041	0.0098	0.0041	0.003	0.3598	0.0485	0.0047	0.0268	0.0013	0.0013	0.012	0.0022	0.9487	0.4677	0.0427	0.0448	0.2055	0.1266		0.8953	0.3043	0.3621	3.1037	1.7312	0.7539	1.3984	1.4454	0.9536
	1277			myristoleoylcarnitine*	LC/MS pos late	48182					0.45	0.39	0.87	0.46	0.34	0.75	1.08	0.79	0.73		0.0162	0.0195	0.0081	0.0052	0.5731	0.0691	0.0035	0.0243	0.0027	0.002	0.1892	0.0224	0.6841	0.3905	0.1291	0.0933	0.1058	0.0878		0.9993	0.4467	0.389	2.9564	1.3667	1.0184	1.1527	1.2501	0.91
	1278			suberoyl carnitine	LC/MS pos early	52990					0.87	0.68	0.79	1.2	0.88	0.74	0.84	0.92	1.08		0.7624	0.252	0.3212	0.0954	0.4005	0.0515	0.4429	0.2683	0.3104	0.084	0.2017	0.0235	0.391	0.2802	0.6936	0.2972	0.391	0.1895		1.2096	1.0537	0.8273	0.6489	0.7799	0.574	0.6793	0.574	0.6221
	1284		Carnitine Metabolism	deoxycarnitine	LC/MS pos early	36747	C01181	HMDB01161	134		0.57	1.09	1.91	0.85	0.68	0.8	0.86	0.69	0.81		0.0009	0.005	0.317	0.0949	0.0002	0.0002	0.0948	0.1258	0.0046	0.0027	0.0117	0.0022	0.2065	0.1865	0.0175	0.0263	0.0145	0.0315		0.9622	0.5478	1.0464	2.3369	1.9873	1.5944	0.9786	0.8416	0.6799
	1285			carnitine	LC/MS pos early	15500	C00318	HMDB00062	10917		0.62	0.96	1.55	0.9	0.8	0.89	0.94	0.74	0.79		0.0025	0.0072	0.6849	0.1694	0.0037	0.0013	0.0733	0.1057	0.0124	0.0058	0.0841	0.0111	0.5247	0.3438	0.0125	0.0222	0.0152	0.0323		0.8375	0.5195	0.8072	2.0022	1.799	1.5999	1.098	1.0346	0.8137
	1290		Ketone Bodies	3-hydroxybutyrate (BHBA)	LC/MS polar	542	C01089	HMDB00357	441		0.5	1.54	3.11	1.22	0.98	0.8	1.79	1.52	0.85		0.001	0.005	0.016	0.0087	0.0002	0.0002	0.0622	0.0982	0.736	0.177	0.2168	0.0249	0.0044	0.0221	0.0094	0.0198	0.2293	0.1354		1.0499	0.5201	1.6174	1.1592	1.4173	1.1304	0.5887	1.0533	0.8926
	1291		Neurotransmitter	acetylcholine	LC/MS pos early	18790					0.34	1.68	4.93	1.34	1.59	1.19	0.88	0.8	0.91		0.0004	0.005	0.0073	0.0048	0.0005	0.0003	0.072	0.1057	0.0183	0.0078	0.2505	0.028	0.3272	0.2507	0.1094	0.0836	0.3764	0.1873		0.9467	0.3225	1.591	0.4724	0.6309	0.7528	1.5931	1.3942	1.2666
	1292		Fatty Acid, Monohydroxy	4-hydroxybutyrate (GHB)	LC/MS polar	34585	C00989	HMDB00710	10413		0.41	0.11	0.27	1.44	0.25	0.17	0.95	1.16	1.22		0.0085	0.0133	1.4678e-05	7.9048e-05	0.005	0.0017	0.0223	0.0532	0.0013	0.0013	0.0012	0.0004	0.9264	0.463	0.821	0.3372	0.7522	0.294		2.644	1.0864	0.2895	2.6341	3.7894	0.6544	0.4978	0.4712	0.5764
	1297			2-hydroxypalmitate	LC/MS neg	35675		HMDB31057	92836		0.86	1.34	1.56	0.86	3.75	4.33	1.14	1	0.88		0.5414	0.2044	0.198	0.0657	0.1416	0.0229	0.5751	0.3074	0.0011	0.0012	0.0001	0.0002	0.6026	0.3669	0.974	0.3756	0.5934	0.2534		1.3169	1.1275	1.7626	1.1867	1.0263	4.4465	0.6891	0.7846	0.6883
	1298			2-hydroxystearate	LC/MS neg	17945	C03045		69417		0.86	1.51	1.75	0.74	1.68	2.29	1.04	0.71	0.68		0.8081	0.261	0.2018	0.0659	0.0842	0.0155	0.3509	0.2357	0.0709	0.0238	0.0242	0.0039	0.7349	0.406	0.4722	0.2256	0.1238	0.0943		0.819	0.705	1.234	22.309	16.4313	37.5592	0.6499	0.676	0.4598
	1301			3-hydroxyoctanoate	LC/MS neg	22001		HMDB01954	26613		0.44	1.43	3.26	0.76	3.32	4.37	1.8	0.86	0.48		0.0012	0.0051	0.0312	0.0152	0.0003	0.0003	0.1011	0.1291	0.0006	0.001	0.0007	0.0004	0.3233	0.2492	0.8171	0.3368	0.2265	0.1346		1.9626	0.8632	2.8132	1.1224	0.8537	3.7271	0.2463	0.4424	0.2128
	1302			3-hydroxydecanoate	LC/MS neg	22053		HMDB02203	26612		0.41	2.3	5.67	0.88	4.56	5.19	0.8	0.61	0.76		0.0008	0.005	0.0016	0.0015	0.0002	0.0002	0.1539	0.154	1.788e-05	0.0002	0.0002	0.0002	0.1634	0.1607	0.0109	0.0207	0.0587	0.0633		1.2446	0.5054	2.8681	1.1795	1.0368	5.3841	0.8511	0.6803	0.517
	1304			3-hydroxylaurate	LC/MS neg	32457		HMDB00387	94216		0.35	2.07	5.88	0.87	6.12	7.04	0.74	0.59	0.8		0.0003	0.005	0.0046	0.0032	0.0001	0.0002	0.1492	0.1524	4.1766e-06	9.5752e-05	1.4986e-05	6.3886e-05	0.0454	0.0732	0.0039	0.0116	0.0822	0.0761		1.4346	0.5062	2.9747	1.1682	1.0155	7.1465	0.7564	0.5604	0.447
	1306			3-hydroxymyristate	LC/MS neg	21158			16064		0.61	2.17	3.57	0.97	9.1	9.41	0.92	0.8	0.87		0.0344	0.0322	0.0042	0.0031	0.0003	0.0003	0.6927	0.3348	2.4203e-06	9.4755e-05	1.0411e-06	1.2522e-05	0.5587	0.3537	0.176	0.116	0.5301	0.235		1.4702	0.8937	3.1916	1.0669	1.0312	9.7043	0.7487	0.6852	0.5979
	1307			3-hydroxypalmitate	LC/MS neg	27503		HMDB10734	301590		0.79	0.85	1.08	1.22	6.99	5.74	0.84	0.88	1.04		0.4731	0.1897	0.7114	0.1731	0.5732	0.0691	0.295	0.2198	1.9885e-06	9.4755e-05	0.0001	0.0002	0.3108	0.2425	0.3798	0.1974	0.8325	0.3121		1.8964	1.4992	1.6132	0.961	1.1712	6.7209	0.5824	0.4912	0.5099
	1320			13-HODE + 9-HODE	LC/MS neg	37752			43013		1.17	3.06	2.61	0.71	1.69	2.38	0.99	1.23	1.24		0.1344	0.0761	0.1963	0.0653	0.2882	0.0399	0.1961	0.18	0.0033	0.0022	0.0284	0.0044	0.5911	0.3617	0.8675	0.3483	0.5808	0.252		0.7592	0.8907	2.3265	1.654	1.1739	2.7974	0.7358	0.7292	0.9053
	1422		Endocannabinoid	oleoyl ethanolamide	LC/MS pos late	38102		HMDB02088	5283454		1.46	1.38	0.95	1.05	1.16	1.1	0.91	0.7	0.77		0.0281	0.0277	0.039	0.018	0.1898	0.0291	0.5484	0.3004	0.1459	0.0448	0.0873	0.0115	0.4315	0.305	0.0196	0.0281	0.0189	0.036		0.7669	1.1166	1.0598	0.6012	0.6314	0.6956	1.4561	1.3281	1.0197
	1425			palmitoyl ethanolamide	LC/MS neg	38165	C16512	HMDB02100	4671		1.21	1.01	0.84	1.05	1.87	1.78	1.02	1.11	1.09		0.6396	0.2251	0.7354	0.1779	0.7749	0.0891	0.9057	0.391	0.0004	0.0008	0.0152	0.0026	0.992	0.4784	0.2488	0.1489	0.472	0.2164		1.0749	1.2987	1.0884	0.5503	0.5753	1.0265	1.033	1.0513	1.1488
	1432			N-oleoyltaurine	LC/MS neg	39732			6437033		1.59	3.56	2.24	1.2	7.88	6.56	1.01	0.62	0.62		0.2875	0.1317	0.0026	0.0022	0.0426	0.009	0.5782	0.3074	0.0023	0.0019	0.0013	0.0005	0.866	0.4441	0.108	0.0831	0.0311	0.0488		0.3458	0.5488	1.2301	0.5519	0.6627	4.3485	1.4875	1.4984	0.9263
	1433			N-stearoyltaurine	LC/MS neg	39730			168274		1.22	0.55	0.45	0.87	1.26	1.45	0.83	0.71	0.86		0.6389	0.2251	0.2002	0.0657	0.0851	0.0156	0.4001	0.2559	0.0615	0.0211	0.1427	0.0176	0.5877	0.3605	0.3081	0.1708	0.602	0.2559		0.8732	1.0641	0.4821	1.8775	1.625	2.3609	0.7785	0.6479	0.5554
	1434			N-palmitoyltaurine	LC/MS neg	39835					1.49	1.98	1.33	1.11	4.59	4.14	0.84	1.08	1.29		0.3747	0.162	0.036	0.0169	0.2799	0.0389	0.8127	0.36	4.8356e-06	9.5752e-05	0.0033	0.0008	0.5932	0.3621	0.6459	0.2855	0.1916	0.1212		1.736	2.5846	3.4303	0.9228	1.0226	4.2344	0.6234	0.5209	0.6709
	1438		Inositol Metabolism	myo-inositol	LC/MS polar	1124	C00137	HMDB00211	892		0.59	1.06	1.78	1.32	0.75	0.57	0.88	0.66	0.75		0.0012	0.0051	0.4863	0.1298	0.0001	0.0002	0.0081	0.0323	0.0017	0.0016	0.0002	0.0002	0.27	0.223	0.0061	0.015	0.0253	0.0422		0.4255	0.2523	0.4491	1.0073	1.3276	0.7525	2.3839	2.0905	1.5709
	1446			inositol 1-phosphate (I1P)	LC/MS polar	43849	C04006	HMDB00213	440194		0.98	1.13	1.15	0.47	0.77	1.66	0.58	0.55	0.94		0.9433	0.2917	0.5076	0.1341	0.4452	0.0562	0.0163	0.0447	0.207	0.0606	0.0692	0.0093	0.185	0.1729	0.0147	0.0243	0.8126	0.3082		0.5151	0.5046	0.5821	1.8885	0.8782	1.4539	1.593	0.9294	0.8781
	1466		Phospholipid Metabolism	choline	LC/MS pos early	15506	C00114	HMDB00097	305		1.32	2.6	1.97	0.96	1.92	2	1.14	0.98	0.86		0.039	0.0339	0.0002	0.0003	0.0018	0.0008	0.3308	0.2298	6.8848e-05	0.0004	2.418e-05	7.1755e-05	0.1501	0.1525	0.8519	0.3471	0.0701	0.0688		0.4504	0.5937	1.169	1.001	0.9629	1.9256	0.968	1.1062	0.9506
	1467			choline phosphate	LC/MS pos early	34396	C00588	HMDB01565	1014		0.86	0.71	0.82	1.08	0.53	0.49	1.16	0.92	0.79		0.1657	0.0879	0.0114	0.0068	0.0479	0.0099	0.1166	0.1378	0.0025	0.0019	0.0026	0.0007	0.1218	0.1334	0.3725	0.1946	0.0263	0.0427		1.0355	0.8955	0.7323	0.9873	1.0619	0.5194	1.3289	1.5471	1.2222
	1468			cytidine 5'-diphosphocholine	LC/MS pos early	34418	C00307	HMDB01413	13804		0.43	1.01	2.34	1.11	0.93	0.83	0.96	0.74	0.78		0.0016	0.0058	0.9113	0.2084	0.0003	0.0003	0.2537	0.2036	0.4456	0.1136	0.0164	0.0028	0.7737	0.4173	0.0578	0.054	0.0427	0.0553		0.7612	0.3283	0.7673	1.0624	1.178	0.9828	1.2407	1.1875	0.9208
	1469			glycerophosphorylcholine (GPC)	LC/MS pos early	15990	C00670	HMDB00086	71920		1.06	2.09	1.97	0.95	1.21	1.28	1.12	1.06	0.95		0.73	0.2471	8.4486e-05	0.0002	0.0059	0.0019	0.4684	0.2762	0.0127	0.0058	0.0283	0.0044	0.1355	0.1417	0.3592	0.1901	0.4791	0.2186		0.8554	0.9061	1.7854	1.1002	1.0405	1.3279	0.8834	0.9877	0.9354
	1473			phosphoethanolamine	LC/MS neg	1600	C00346	HMDB00224	1015		3.06	6.2	2.02	1.28	2.93	2.29	0.57	0.45	0.78		0.0004	0.005	0.0001	0.0003	6.422e-05	0.0001	0.2768	0.212	0.0008	0.0011	0.0069	0.0014	0.0011	0.0112	0.0004	0.0033	0.0602	0.0638		0.0907	0.2777	0.5621	0.8354	1.0698	2.4454	2.3796	1.3666	1.0592
	1474			cytidine-5'-diphosphoethanolamine	LC/MS pos early	34410	C00570	HMDB01564	123727		0.81	1.63	2.02	1.1	0.78	0.71	0.91	0.74	0.81		0.0752	0.0508	0.0027	0.0022	0.0002	0.0002	0.4725	0.2764	0.0689	0.0233	0.0458	0.0065	0.5388	0.348	0.0539	0.052	0.2237	0.1334		0.357	0.2894	0.5834	1.1721	1.2873	0.9149	1.34	1.2237	0.991
	1475			glycerophosphoethanolamine	LC/MS polar	37455	C01233	HMDB00114	123874		1.36	1.03	0.76	0.84	0.52	0.62	1.29	1.02	0.79		0.4504	0.1843	0.8177	0.1911	0.5123	0.0633	0.3087	0.2246	0.0068	0.0037	0.0018	0.0006	0.2344	0.2048	0.8345	0.3414	0.2377	0.138		0.2789	0.3793	0.287	1.7559	1.4816	0.9145	1.1088	1.4278	1.1295
	1476			trimethylamine N-oxide	LC/MS pos early	40406	C01104	HMDB00925	1145		0.79	2.14	2.71	0.92	1.63	1.77	1.23	1.04	0.85		0.0628	0.0459	0.0003	0.0004	0.0002	0.0002	0.3067	0.2246	0.0028	0.002	0.0027	0.0008	0.0694	0.0923	0.6396	0.2835	0.0553	0.0607		1.0658	0.8406	2.2767	1.2516	1.1553	2.0444	0.2728	0.3349	0.284
	1477			glycerophosphoinositol*	LC/MS polar	47155					1.35	1.08	0.8	1.06	1.29	1.22	1.36	1.34	0.98		0.1076	0.0655	0.5577	0.1438	0.1968	0.0296	0.6862	0.3324	0.0379	0.0139	0.1347	0.0167	0.118	0.1309	0.0296	0.0355	0.9641	0.3456		0.6598	0.8928	0.7107	0.8477	0.9013	1.0974	1.106	1.5029	1.4802
	1478			1,2-dipalmitoyl-GPC (16:0/16:0)	LC/MS pos late	19130		HMDB00564	452110		0.97	0.91	0.94	0.73	1.76	2.42	1.09	0.94	0.86		0.7377	0.2482	0.2384	0.0755	0.5602	0.0681	0.0012	0.0171	9.0291e-05	0.0004	1.2623e-06	1.2522e-05	0.4075	0.2896	0.4239	0.2101	0.1188	0.092		1.0244	0.993	0.9341	0.9009	0.6541	1.583	1.0916	1.1863	1.0212
	1479			1-palmitoyl-2-oleoyl-GPC (16:0/18:1)	LC/MS pos late	52461			6436017		0.97	1.06	1.09	0.96	0.91	0.95	1.05	0.87	0.83		0.7506	0.2514	0.427	0.1177	0.2569	0.0365	0.4388	0.2666	0.1013	0.0327	0.3216	0.0351	0.5777	0.3586	0.1474	0.1018	0.0494	0.058		0.9301	0.9014	0.9832	1.2241	1.1766	1.1134	0.936	0.9855	0.8184
	1480			1-stearoyl-2-arachidonoyl-GPC (18:0/20:4)	LC/MS pos late	42450			16219824		0.97	1.72	1.77	0.96	1.42	1.48	0.84	0.69	0.82		0.7962	0.2576	0.0026	0.0022	0.0007	0.0004	0.7201	0.339	0.0163	0.0071	0.0008	0.0004	0.2653	0.2205	0.0317	0.0367	0.1638	0.1122		0.4875	0.4724	0.8364	1.1672	1.1175	1.6555	1.3168	1.1095	0.9085
	1481			1-palmitoyl-2-linoleoyl-GPC (16:0/18:2)	LC/MS pos late	42446			5287971		0.94	1.09	1.16	1.16	1.05	0.91	1	0.72	0.72		0.6058	0.2166	0.2859	0.088	0.1171	0.02	0.1787	0.1702	0.7767	0.1864	0.402	0.042	0.9881	0.4781	0.0252	0.0327	0.0165	0.0339		0.9177	0.867	1.0038	0.9576	1.1111	1.0099	1.2395	1.2387	0.8863
	1483			1-stearoyl-2-oleoyl-GPC (18:0/18:1)	LC/MS pos late	52438					1.43	1.08	0.76	1.01	0.78	0.77	1.12	0.97	0.86		0.0071	0.0122	0.3386	0.0983	0.0128	0.0036	0.919	0.3927	0.0074	0.004	0.0083	0.0016	0.2625	0.2203	0.6828	0.2955	0.1142	0.0904		0.8257	1.1785	0.8925	3.4389	3.4658	2.6821	0.8942	1.0021	0.8633
	1485			1,2-dioleoyl-GPC (18:1/18:1)*	LC/MS pos late	52457			10350317		0.84	1.05	1.25	0.96	0.85	0.88	0.91	0.7	0.77		0.1408	0.0772	0.5354	0.1397	0.0417	0.0089	0.6151	0.317	0.0234	0.0097	0.2007	0.0235	0.2649	0.2205	0.0024	0.0093	0.0115	0.0293		0.9486	0.7929	0.9937	1.9415	1.8681	1.6505	0.9813	0.8969	0.6901
	1487			1-palmitoyl-2-arachidonoyl-GPC (16:0/20:4)	LC/MS pos late	52462			10747814		0.81	1.47	1.81	0.84	1.56	1.86	0.86	0.71	0.83		0.0939	0.0592	0.0117	0.0069	0.0003	0.0003	0.0815	0.1129	0.0041	0.0026	4.3166e-06	3.311e-05	0.3167	0.2455	0.0347	0.0393	0.1681	0.1124		0.7323	0.5948	1.0786	0.6639	0.5589	1.0382	1.5633	1.3428	1.1102
	1488			1-stearoyl-2-linoleoyl-GPC (18:0/18:2)*	LC/MS pos late	52452					1.89	0.85	0.45	1.2	1.07	0.89	1.01	0.69	0.69		0.0026	0.0072	0.0683	0.028	0.0021	0.0009	0.5361	0.2966	0.5919	0.1456	0.7543	0.0732	0.8208	0.4309	0.0827	0.0695	0.0014	0.0144		0.4859	0.918	0.4137	1.3422	1.6157	1.437	1.0502	1.0611	0.7274
	1491			1-palmitoleoyl-2-oleoyl-GPC (16:1/18:1)*	LC/MS pos late	52458					0.62	0.92	1.49	0.79	1.16	1.47	1.2	1.02	0.85		0.0121	0.0166	0.5583	0.1438	0.0136	0.0037	0.0685	0.1027	0.1518	0.0464	0.0008	0.0004	0.1021	0.1196	0.7687	0.3203	0.1057	0.0878		0.7219	0.4451	0.6642	1.329	1.0515	1.5461	1.0199	1.2216	1.0415
	1492			1-palmitoyl-2-palmitoleoyl-GPC (16:0/16:1)*	LC/MS pos late	52470					0.82	0.9	1.09	0.83	0.96	1.16	1.41	1.24	0.88		0.1491	0.081	0.3248	0.0961	0.3627	0.0485	0.0642	0.0984	0.6347	0.1555	0.0102	0.0019	0.0144	0.037	0.0282	0.0343	0.2091	0.128		1.0218	0.8409	0.9154	1.0158	0.8427	0.9737	1.1814	1.6689	1.4607
	1495			1-stearoyl-2-arachidonoyl-GPI (18:0/20:4)	LC/MS polar	52449					0.77	1.39	1.81	0.72	1.36	1.88	0.66	0.6	0.9		0.0896	0.0572	0.0215	0.0111	0.0035	0.0013	0.0082	0.0323	0.0143	0.0064	0.0003	0.0003	0.0324	0.0595	0.0271	0.0335	0.5844	0.253		0.9837	0.7564	1.3711	0.8064	0.5841	1.0974	1.7407	1.152	1.0407
	1496			1-oleoyl-2-linoleoyl-GPC (18:1/18:2)*	LC/MS pos late	52453					0.76	1.17	1.54	0.86	0.95	1.1	0.79	0.59	0.76		0.0477	0.0393	0.1235	0.0464	0.0077	0.0024	0.0345	0.0688	0.3024	0.082	0.161	0.0196	0.0215	0.0473	0.0005	0.0041	0.0108	0.0293		0.8654	0.659	1.0125	1.3443	1.1584	1.2723	1.081	0.8495	0.6428
	1502			1-palmitoyl-2-oleoyl-GPG (16:0/18:1)	LC/MS polar	52448			5283509		1.28	1.08	0.84	0.85	0.54	0.64	0.99	0.83	0.84		0.0136	0.0176	0.2898	0.089	0.0498	0.0102	0.1231	0.1404	0.001	0.0012	0.0033	0.0008	0.9084	0.4599	0.1241	0.0907	0.1309	0.0981		1.0411	1.3276	1.1194	0.9601	0.8115	0.5155	1.0295	1.0211	0.859
	1504			1-palmitoyl-2-oleoyl-GPE (16:0/18:1)	LC/MS pos late	19263		HMDB05320	5283496		1.06	0.98	0.93	0.91	0.95	1.05	1.13	1	0.88		0.5872	0.2131	0.8132	0.1904	0.4393	0.0556	0.1309	0.146	0.4453	0.1136	0.3786	0.0405	0.268	0.222	0.9896	0.3787	0.2347	0.1377		0.9836	1.0396	0.9653	0.9618	0.8718	0.9158	1.1532	1.3036	1.1504
	1506			1-stearoyl-2-arachidonoyl-GPE (18:0/20:4)	LC/MS pos late	52447			5289133		1.33	2	1.5	0.68	1.39	2.03	0.95	0.77	0.81		0.0558	0.0431	0.0012	0.0013	0.0123	0.0035	0.0016	0.0188	0.0004	0.0008	3.0234e-05	7.5437e-05	0.6562	0.384	0.0261	0.0327	0.1526	0.1071		0.3038	0.4042	0.6077	1.3412	0.916	1.8639	1.3225	1.259	1.0224
	1508			1-stearoyl-2-oleoyl-GPE (18:0/18:1)	LC/MS pos late	42448					1.21	1.11	0.92	0.97	0.96	0.99	1.01	0.84	0.84		0.0934	0.0591	0.1726	0.0596	0.3591	0.0485	0.6173	0.3174	0.2459	0.0697	0.9665	0.0913	0.9942	0.4786	0.0625	0.0568	0.1315	0.0981		0.9022	1.0917	1.0021	2.1914	2.1296	2.1139	0.8097	0.8145	0.682
	1509			1-palmitoyl-2-arachidonoyl-GPE (16:0/20:4)*	LC/MS pos late	52464		HMDB05323	9546800		0.95	1.24	1.3	0.72	1.19	1.65	1.02	0.9	0.88		0.5952	0.2146	0.0341	0.0164	0.0198	0.0052	0.0008	0.0136	0.0023	0.0018	9.2642e-05	0.0001	0.8145	0.4293	0.2174	0.137	0.1826	0.1179		0.7424	0.7059	0.9177	0.997	0.7188	1.1891	3.1215	3.1951	2.8179
	1511			1-palmitoyl-2-linoleoyl-GPE (16:0/18:2)	LC/MS pos late	42449		HMDB05322	9546747		1.11	1.06	0.96	0.96	1.09	1.13	1.18	0.9	0.77		0.3268	0.1452	0.4077	0.1134	0.6614	0.0779	0.4959	0.2853	0.2909	0.0798	0.1272	0.0159	0.3557	0.2646	0.4342	0.2141	0.1324	0.0985		1.1023	1.2222	1.1689	0.6678	0.6428	0.7283	1.1244	1.3215	1.0145
	1514			1-stearoyl-2-linoleoyl-GPE (18:0/18:2)*	LC/MS pos late	52446			9546749		1.17	1.05	0.9	1.06	0.92	0.87	1.08	0.89	0.83		0.1411	0.0772	0.6126	0.1553	0.1031	0.018	0.5034	0.2866	0.4551	0.1155	0.2872	0.0318	0.556	0.3537	0.1591	0.1087	0.1659	0.1122		0.9103	1.0622	0.9519	1.4471	1.5293	1.3318	0.8516	0.9211	0.7617
	1525			1,2-dioleoyl-GPG (18:1/18:1)	LC/MS polar	19142			11846228		0.52	0.8	1.55	0.89	0.29	0.32	0.58	0.28	0.49		0.0057	0.0113	0.1844	0.0625	0.017	0.0045	0.405	0.2582	0.001	0.0011	0.001	0.0004	0.071	0.0936	0.0002	0.0021	0.0605	0.0638		1.5672	0.8117	1.2556	2.4288	2.1637	0.6981	1.0749	0.6252	0.3055
	1526			1,2-dioleoyl-GPI (18:1/18:1)	LC/MS polar	52619					1.11	0.89	0.8	0.86	1.01	1.17	0.84	0.79	0.94		0.4969	0.1931	0.449	0.1223	0.1376	0.0225	0.2252	0.1913	0.8986	0.2085	0.1518	0.0185	0.2307	0.2032	0.1182	0.0886	0.7595	0.2953		0.8499	0.945	0.7598	1.1153	0.9635	1.1258	1.1838	0.9917	0.9329
	1528			1-palmitoyl-2-stearoyl-GPC (16:0/18:0)	LC/MS pos late	52616					1.81	0.77	0.42	0.85	1.27	1.49	1.2	1	0.83		0.0007	0.005	0.0062	0.0042	0.0002	0.0002	0.0739	0.1057	0.0108	0.0052	0.0014	0.0005	0.1173	0.1307	0.9962	0.3791	0.1037	0.0873		0.5305	0.9613	0.4069	1.1802	1.0046	1.501	0.9772	1.1708	0.9743
	1529			1,2-dioleoyl-GPE (18:1/18:1)	LC/MS pos late	52609			9546757		1	1.15	1.15	0.97	1	1.03	1.01	0.83	0.82		0.9639	0.2958	0.0778	0.0314	0.204	0.0304	0.6745	0.3318	0.896	0.2083	0.5878	0.0588	0.9148	0.462	0.0485	0.0487	0.0522	0.0602		0.8621	0.8641	0.9896	1.2679	1.2362	1.2736	0.9241	0.9343	0.7655
	1531			1-palmitoyl-2-oleoyl-GPI (16:0/18:1)*	LC/MS polar	52669					1.3	0.74	0.57	0.87	0.94	1.09	1.01	0.98	0.97		0.1046	0.0645	0.0742	0.03	0.0038	0.0014	0.1997	0.181	0.5694	0.1409	0.3016	0.0332	0.9302	0.4635	0.752	0.3159	0.8628	0.3188		0.9937	1.2929	0.7381	0.6843	0.5942	0.6463	2.2716	2.289	2.2169
	1537			1-palmitoyl-2-linolenoyl-GPC (16:0/18:3)*	LC/MS pos late	52684					0.7	1.12	1.6	0.82	1.5	1.82	1.27	0.95	0.74		0.0487	0.04	0.3284	0.0965	0.0006	0.0004	0.2454	0.1999	0.0304	0.0117	0.0002	0.0002	0.1007	0.1189	0.7429	0.3134	0.0176	0.0349		0.9087	0.6376	1.0192	0.9816	0.8086	1.4702	1.0912	1.3901	1.0345
	1540			1-palmitoleoyl-2-linoleoyl-GPC (16:1/18:2)*	LC/MS pos late	52683					0.43	1.11	2.6	0.77	1.49	1.94	1.27	1.11	0.87		0.0011	0.0051	0.3664	0.1044	3.1029e-05	8.3365e-05	0.0404	0.0778	0.0105	0.0051	0.0007	0.0003	0.057	0.0838	0.2877	0.1644	0.0839	0.0771		0.857	0.366	0.9506	0.9186	0.7041	1.3661	1.1927	1.5168	1.3197
	1545			1,2-dilinoleoyl-GPC (18:2/18:2)	LC/MS pos late	52603			5288075		0.72	1.2	1.68	0.77	0.77	1	1.38	1.19	0.86		0.1399	0.0772	0.5433	0.1415	0.0939	0.0168	0.1998	0.181	0.1998	0.0588	---	---	0.023	0.0483	0.0993	0.0785	0.1417	0.1009		0.6686	0.4785	0.8048	0.5409	0.4187	0.4187	1.1651	1.6076	1.3848
	1548			1-oleoyl-2-linoleoyl-GPE (18:1/18:2)*	LC/MS pos late	52687		HMDB05349	9546753		1.01	1.17	1.15	0.87	1.08	1.24	1.02	0.87	0.86		0.9809	0.2999	0.0689	0.0282	0.2267	0.0329	0.1535	0.154	0.2398	0.0682	0.043	0.0062	0.8769	0.4475	0.1566	0.1074	0.1284	0.0974		0.7421	0.7524	0.8684	1.0453	0.9113	1.1255	1.1794	1.199	1.0264
	1550			1,2-distearoyl-GPC (18:0/18:0)	LC/MS pos late	19132			94190		2.41	1	0.42	0.94	0.49	0.52	2.5	2.19	0.88		0.0659	0.0465	---	---	0.0659	0.0127	0.6358	0.3203	0.044	0.0156	0.3335	0.0363	0.0014	0.0112	0.006	0.015	0.4951	0.2215		0.2493	0.6001	0.2493	1.1233	1.0606	0.5494	0.6019	1.5018	1.3202
	1561			1-palmitoyl-2-oleoyl-GPS (16:0/18:1)	LC/MS pos late	19261	C13880		5283499		1.14	0.99	0.88	1.06	1.2	1.14	0.95	0.65	0.69		0.2123	0.1052	0.9866	0.2222	0.1619	0.0255	0.4846	0.2803	0.0116	0.0054	0.0963	0.0124	0.6458	0.3812	0.009	0.0193	0.0203	0.0372		1.0611	1.2057	1.0551	0.8714	0.9196	1.0499	0.9569	0.9051	0.6214
	1598		Phosphatidylserine (PS)	1-stearoyl-2-arachidonoyl-GPS (18:0/20:4)	LC/MS pos late	52235					0.82	1.55	1.89	0.66	1.49	2.25	0.97	0.85	0.87		0.0874	0.0567	0.0037	0.0028	0.0012	0.0006	0.0035	0.0243	0.0009	0.0011	0.0001	0.0002	0.8531	0.4411	0.241	0.1473	0.244	0.1397		0.5963	0.4873	0.9232	1.582	1.0492	2.3624	1.0945	1.061	0.9251
	1599			1-stearoyl-2-oleoyl-GPS (18:0/18:1)	LC/MS polar	48494			9547087		1.05	1.25	1.19	0.83	1.14	1.38	0.56	0.47	0.84		0.786	0.2563	0.107	0.0412	0.2189	0.0321	0.1433	0.1479	0.1144	0.036	0.0403	0.0058	0.006	0.0253	0.0045	0.0121	0.3233	0.1699		0.7768	0.8177	0.9727	2.1415	1.7709	2.4432	1.1692	0.655	0.5479
	1605		Lysolipid	1-palmitoyl-GPC (16:0)	LC/MS pos late	33955		HMDB10382	86554		1.85	0.89	0.48	0.97	0.75	0.78	2.11	2.26	1.07		0.0003	0.005	0.14	0.0506	0.0001	0.0002	0.6789	0.3318	0.0155	0.0068	0.0059	0.0013	0.0009	0.0102	0.0012	0.0066	0.3015	0.1626		1.1793	2.1822	1.0531	0.859	0.8293	0.646	0.8509	1.7935	1.9218
	1606			2-palmitoyl-GPC (16:0)*	LC/MS neg	35253		HMDB61702	15061532		1.64	0.79	0.48	0.99	0.32	0.33	1.69	1.36	0.81		0.2551	0.1199	0.7886	0.1866	0.107	0.0186	0.9326	0.3961	0.0616	0.0211	0.032	0.0048	0.1129	0.1275	0.2364	0.1458	0.3224	0.1699		1.1366	1.8662	0.9018	1.1395	1.1288	0.3676	0.8428	1.4204	1.1497
	1607			1-palmitoleoyl-GPC (16:1)*	LC/MS pos late	33230		HMDB10383	24779461		1.08	1.25	1.16	0.95	1	1.06	1.71	1.63	0.95		0.4474	0.1835	0.0699	0.0284	0.1284	0.0213	0.6237	0.3182	0.8897	0.2073	0.2308	0.0261	0.0027	0.0152	0.0045	0.0121	0.4996	0.223		1.0081	1.0873	1.2571	1.0027	0.9485	1.0069	0.6524	1.113	1.0607
	1611			1-stearoyl-GPC (18:0)	LC/MS pos late	33961		HMDB10384	497299		2.32	0.99	0.43	1.03	0.73	0.7	2.02	2.19	1.09		0.0001	0.0047	0.8243	0.1919	4.3645e-05	0.0001	0.6629	0.3284	0.0237	0.0098	0.0015	0.0005	0.0003	0.0064	0.0005	0.0041	0.2619	0.1463		0.5472	1.2711	0.541	1.0856	1.1214	0.7877	0.5793	1.1709	1.271
	1613			1-oleoyl-GPC (18:1)	LC/MS pos late	48258		HMDB02815	16081932		1.36	1.27	0.93	0.89	0.77	0.87	1.34	1.35	1.01		0.0039	0.0097	0.0459	0.0205	0.4234	0.0538	0.3431	0.2334	0.074	0.0246	0.0161	0.0028	0.0137	0.0356	0.0126	0.0222	0.8909	0.3259		0.8522	1.1591	1.0835	1.3265	1.1791	1.0231	0.623	0.8325	0.8384
	1616			1-linoleoyl-GPC (18:2)	LC/MS pos late	34419	C04100	HMDB10386	11988421		1.04	1.33	1.28	0.86	0.92	1.07	1.3	1.29	0.99		0.8297	0.2653	0.3206	0.0954	0.3944	0.0511	0.1325	0.1471	0.374	0.097	0.2498	0.028	0.1716	0.1658	0.1347	0.096	0.9406	0.3395		1.0048	1.048	1.3387	1.1537	0.9947	1.0625	0.6045	0.7849	0.7804
	1638			1-lignoceroyl-GPC (24:0)	LC/MS pos late	49617					1.77	0.4	0.23	1.33	0.36	0.27	1.46	1.46	1		0.0129	0.017	0.004	0.003	0.0004	0.0003	0.1203	0.1404	0.0041	0.0026	4.2184e-05	8.3495e-05	0.2448	0.2089	0.0601	0.0556	0.8399	0.3135		1.0986	1.9425	0.4448	1.0904	1.4487	0.3915	0.3666	0.5346	0.5347
	1641			1-palmitoyl-GPE (16:0)	LC/MS pos late	35631		HMDB11503	9547069		1.67	0.86	0.52	0.85	0.55	0.65	2.29	2.88	1.26		0.0008	0.005	0.0641	0.0264	0.0001	0.0002	0.2314	0.1943	0.0033	0.0023	0.0041	0.001	0.0004	0.0069	0.0002	0.0021	0.0616	0.0638		1.0186	1.6962	0.8768	0.7011	0.5991	0.3882	1.1818	2.7013	3.4092
	1644			1-stearoyl-GPE (18:0)	LC/MS pos late	42398		HMDB11130	9547068		1.57	1.13	0.72	0.78	0.64	0.83	2.11	2.39	1.14		0.0018	0.0061	0.1508	0.0532	0.0036	0.0013	0.0432	0.0809	0.0058	0.0033	0.0292	0.0045	0.0001	0.0064	5.554e-05	0.0014	0.1008	0.0863		0.6537	1.0289	0.7361	1.3363	1.0373	0.8615	0.6626	1.3965	1.5865
	1645			2-stearoyl-GPE (18:0)*	LC/MS neg	41220					1.39	0.66	0.48	0.76	0.63	0.83	1.78	1.4	0.79		0.429	0.1792	0.4522	0.1229	0.1076	0.0187	0.4277	0.2622	0.1854	0.0552	0.7078	0.0692	0.0835	0.1054	0.1826	0.119	0.2927	0.1593		0.7122	0.9868	0.472	1.875	1.4216	1.1778	0.7634	1.3579	1.0716
	1646			1-oleoyl-GPE (18:1)	LC/MS pos late	35628		HMDB11506	9547071		1.35	1.32	0.98	0.91	0.8	0.88	1.75	1.7	0.97		0.0067	0.0119	0.0091	0.0057	0.6978	0.0817	0.1605	0.1574	0.016	0.007	0.0121	0.0022	0.0005	0.0081	0.0009	0.0055	0.6616	0.2691		0.8716	1.175	1.1504	1.0141	0.9275	0.8144	0.6416	1.1257	1.0934
	1650			1-linoleoyl-GPE (18:2)*	LC/MS pos late	36600		HMDB11507	52925130		1.41	1.55	1.1	1.1	0.99	0.9	1.95	2.02	1.03		0.0194	0.0216	0.0101	0.0061	0.4352	0.0552	0.4988	0.286	0.975	0.2228	0.4409	0.0454	0.0064	0.0253	0.0044	0.0121	0.6558	0.2689		1.1112	1.5647	1.7176	0.8576	0.944	0.8505	0.5081	0.9928	1.0269
	1654			1-arachidonoyl-GPE (20:4n6)*	LC/MS neg	35186		HMDB11517	42607465		1.09	1.53	1.4	0.69	0.91	1.32	0.88	0.65	0.74		0.7454	0.2503	0.1926	0.0647	0.212	0.0313	0.264	0.2066	0.8413	0.1986	0.2723	0.0303	0.889	0.4518	0.3469	0.1871	0.1863	0.1194		0.7611	0.8273	1.1614	1.4154	0.9713	1.283	1.2879	1.1299	0.8388
	1664			1-palmitoyl-GPI (16:0)*	LC/MS neg	35305		HMDB61695			1.69	1.03	0.61	1.09	1.56	1.43	2.04	2.22	1.09		0.2126	0.1052	0.6914	0.1703	0.2352	0.0339	0.9184	0.3927	0.0433	0.0154	0.165	0.0201	0.0377	0.0646	0.0271	0.0335	0.6526	0.2688		1.1631	1.9712	1.1976	0.6428	0.7027	1.0058	0.5883	1.2013	1.3048
	1667			1-stearoyl-GPI (18:0)	LC/MS neg	19324		HMDB61696			1.53	0.99	0.65	1.15	0.78	0.68	1.27	1.25	0.98		0.3078	0.1387	0.8435	0.1952	0.3	0.0412	0.8861	0.387	0.3741	0.097	0.4501	0.0462	0.3816	0.2774	0.418	0.2091	0.9163	0.3326		0.8371	1.2818	0.8281	2.0103	2.3083	1.5716	0.5729	0.7285	0.7145
	1669			1-oleoyl-GPI (18:1)*	LC/MS neg	36602					1.48	1.02	0.69	0.99	1.32	1.34	1.52	1.32	0.87		0.2328	0.1124	0.7503	0.1799	0.212	0.0313	0.8029	0.3586	0.135	0.0418	0.2197	0.0251	0.1428	0.1469	0.2754	0.1605	0.4779	0.2186		0.8769	1.2987	0.8955	1.2703	1.2527	1.6822	0.603	0.9151	0.7969
	1671			1-linoleoyl-GPI (18:2)*	LC/MS neg	36594					1.05	1.44	1.37	0.88	1.73	1.97	1.29	1.08	0.84		0.8359	0.2657	0.1942	0.065	0.2247	0.0327	0.5852	0.3082	0.0432	0.0154	0.0368	0.0055	0.2551	0.2162	0.6792	0.2945	0.3426	0.1756		1.4541	1.5286	2.1009	1.0381	0.9145	1.7977	0.4964	0.6418	0.5369
	1675			1-arachidonoyl-GPI (20:4)*	LC/MS neg	34214		HMDB61690			0.94	1.98	2.1	0.61	2.39	3.89	1	0.79	0.79		0.8712	0.2742	0.0383	0.0177	0.0248	0.0061	0.0222	0.0532	0.0025	0.0019	6.9284e-07	1.1455e-05	0.8408	0.4387	0.5053	0.2375	0.1674	0.1124		1.2093	1.139	2.3932	0.6087	0.3742	1.4561	1.1886	1.1929	0.9388
	1677			1-stearoyl-GPS (18:0)*	LC/MS neg	45966			9547101		1.27	0.62	0.49	1.09	0.58	0.54	1.43	1.21	0.85		0.6125	0.2174	0.2034	0.0659	0.1249	0.0208	0.9622	0.4016	0.1061	0.0339	0.2424	0.0273	0.231	0.2032	0.4185	0.2091	0.4556	0.2114		0.4881	0.6191	0.3012	2.0227	2.1969	1.1821	0.9723	1.3876	1.1739
	1678			1-oleoyl-GPS (18:1)	LC/MS neg	19260			9547099		0.84	1.08	1.29	0.9	1.07	1.2	1.17	0.96	0.82		0.6795	0.2355	0.6316	0.1592	0.3193	0.0437	0.5776	0.3074	0.5588	0.1386	0.3528	0.0382	0.4663	0.3181	0.8911	0.3538	0.334	0.1736		0.7542	0.6321	0.8151	1.7157	1.5357	1.8435	0.8655	1.0162	0.8317
	1688			1-palmitoyl-GPG (16:0)*	LC/MS neg	45970			3300276		1.53	1.02	0.66	1.02	0.54	0.53	1.65	1.84	1.12		0.3301	0.1458	0.7376	0.1779	0.3713	0.0494	0.9236	0.3931	0.0013	0.0013	0.0243	0.0039	0.0324	0.0595	0.018	0.0265	0.3128	0.1663		1.0928	1.6721	1.1107	0.4485	0.4578	0.2404	0.8026	1.3215	1.4805
	1690			1-palmitoyl-GPS (16:0)*	LC/MS neg	46130			9547100		1.08	0.32	0.3	0.91	0.43	0.48	2.01	2.01	1		0.8136	0.2621	0.0342	0.0164	0.021	0.0054	0.5913	0.3094	0.0094	0.0047	0.1264	0.0159	0.0427	0.0707	0.0426	0.0448	0.9993	0.3518		0.8234	0.8882	0.2641	0.903	0.8174	0.3885	1.7173	3.4474	3.4525
	1691			1-stearoyl-GPG (18:0)	LC/MS neg	34437					1.96	0.37	0.19	0.91	0.49	0.54	1.3	1.18	0.91		0.2691	0.1254	0.0315	0.0153	0.0315	0.0073	0.5361	0.2966	0.0016	0.0014	0.1421	0.0175	0.2053	0.1864	0.4748	0.2264	0.5386	0.2359		0.816	1.5982	0.3038	1.7918	1.6378	0.8794	0.926	1.2038	1.0946
	1693			1-oleoyl-GPG (18:1)*	LC/MS neg	45968					0.81	0.91	1.13	0.78	0.56	0.71	0.72	0.53	0.74		0.4423	0.1828	0.8207	0.1914	0.4657	0.0586	0.1425	0.1479	2.5174e-05	0.0002	0.1077	0.0137	0.2424	0.2082	0.0413	0.0445	0.2302	0.1355		1.2113	0.9764	1.1073	1.6231	1.2721	0.9027	0.9981	0.7167	0.5334
	1706		Plasmalogen	1-(1-enyl-palmitoyl)-2-oleoyl-GPE (P-16:0/18:1)*	LC/MS pos late	52477					1.12	1.24	1.1	1.11	1.13	1.02	1.03	0.87	0.84		0.2539	0.1198	0.044	0.02	0.1757	0.0275	0.2885	0.2178	0.0617	0.0211	0.788	0.0762	0.9475	0.4677	0.424	0.2101	0.4566	0.2114		1.4147	1.5819	1.7476	0.8328	0.9236	0.9414	0.9679	1.0011	0.8426
	1707			1-(1-enyl-palmitoyl)-2-linoleoyl-GPE (P-16:0/18:2)*	LC/MS pos late	52677					1.26	1.46	1.16	1.09	1.17	1.07	1.29	1.02	0.79		0.4076	0.1725	0.1208	0.0456	0.4733	0.0594	0.9966	0.4124	0.2252	0.0649	0.6077	0.0603	0.1507	0.1526	0.7748	0.3215	0.1512	0.1068		0.9022	1.1335	1.3133	0.2804	0.307	0.3278	2.2457	2.9005	2.2895
	1708			1-(1-enyl-palmitoyl)-2-palmitoyl-GPC (P-16:0/16:0)*	LC/MS pos late	52716			11146967		0.62	1.84	2.96	0.7	1.6	2.27	0.89	0.72	0.81		0.001	0.005	0.0003	0.0004	4.4625e-05	0.0001	0.0019	0.0193	0.0004	0.0008	1.2845e-05	6.3711e-05	0.2974	0.2371	0.0067	0.0158	0.0986	0.0852		2.5622	1.5931	4.7171	0.8696	0.612	1.389	0.9495	0.8449	0.6831
	1709			1-(1-enyl-palmitoyl)-2-palmitoleoyl-GPC (P-16:0/16:1)*	LC/MS pos late	52713					0.66	1.41	2.13	0.77	1.36	1.77	1.4	1.44	1.02		0.0071	0.0122	0.01	0.0061	0.0002	0.0002	0.0007	0.0136	0.0004	0.0008	5.3404e-06	3.311e-05	0.2637	0.2205	0.2383	0.1465	0.6829	0.2752		1.28	0.85	1.8095	0.4863	0.374	0.6626	0.8648	1.2136	1.2437
	1710			1-(1-enyl-palmitoyl)-2-arachidonoyl-GPE (P-16:0/20:4)*	LC/MS pos late	52673					0.83	1.22	1.48	0.87	1.26	1.45	0.93	0.74	0.8		0.1106	0.0668	0.0589	0.0248	0.0096	0.0028	0.0636	0.0982	0.0019	0.0016	0.005	0.0011	0.4478	0.3091	0.0138	0.0236	0.0463	0.0562		1.0233	0.8463	1.2493	0.5566	0.4829	0.7012	1.8024	1.6714	1.3411
	1712			1-(1-enyl-palmitoyl)-2-oleoyl-GPC (P-16:0/18:1)*	LC/MS pos late	52478					0.71	1.43	2.02	0.9	1.02	1.13	1.2	1.07	0.89		0.016	0.0195	0.0136	0.0076	0.0003	0.0003	0.2103	0.1865	0.7947	0.1888	0.0776	0.0103	0.0806	0.1023	0.3876	0.1994	0.1234	0.0943		1.8212	1.2869	2.6035	0.9583	0.8656	0.9756	0.8392	1.0059	0.8938
	1714			1-(1-enyl-stearoyl)-2-oleoyl-GPE (P-18:0/18:1)	LC/MS pos late	52614					1.39	1.13	0.81	1.12	1.02	0.91	1.07	0.84	0.79		0.0226	0.0241	0.1495	0.053	0.0893	0.0162	0.3383	0.2327	0.6639	0.162	0.4164	0.0433	0.5709	0.3567	0.1218	0.0902	0.0668	0.067		0.8696	1.2107	0.9809	4.8725	5.4757	4.9565	0.703	0.7545	0.593
	1715			1-(1-enyl-stearoyl)-2-linoleoyl-GPE (P-18:0/18:2)*	LC/MS pos late	52748					0.87	1.44	1.66	1.18	1.05	0.89	1.25	0.99	0.79		0.8173	0.2623	0.3386	0.0983	0.1978	0.0297	0.2464	0.2	0.3333	0.089	0.3949	0.0414	0.2786	0.2264	0.972	0.3755	0.2357	0.1379		0.7196	0.6256	1.0382	1.5037	1.7798	1.5755	0.7241	0.904	0.7153
	1716			1-(1-enyl-palmitoyl)-2-arachidonoyl-GPC (P-16:0/20:4)*	LC/MS pos late	52689					0.54	3.12	5.74	0.9	2.56	2.85	0.72	0.54	0.74		0.0014	0.0056	0.0001	0.0002	1.2028e-06	1.4219e-05	0.2164	0.1878	5.2773e-05	0.0004	5.0604e-05	8.9638e-05	0.0158	0.0389	0.0013	0.0066	0.0355	0.0527		1.6007	0.8708	5.0001	0.3891	0.3493	0.9951	1.5897	1.15	0.8516
	1717			1-(1-enyl-palmitoyl)-2-linoleoyl-GPC (P-16:0/18:2)*	LC/MS pos late	52682					0.68	1.57	2.3	0.96	1.15	1.19	1.13	0.86	0.76		0.0107	0.0154	0.0019	0.0018	0.0003	0.0003	0.7264	0.3405	0.1713	0.0516	0.0596	0.0081	0.3785	0.2767	0.1637	0.1108	0.0574	0.0624		2.1536	1.4726	3.3848	0.5995	0.576	0.6869	1.09	1.2274	0.9325
	1720			1-(1-enyl-stearoyl)-2-arachidonoyl-GPE (P-18:0/20:4)*	LC/MS pos late	52475		HMDB05779	9547058		1.09	1.23	1.12	0.91	1.14	1.25	0.84	0.68	0.81		0.523	0.1993	0.1309	0.0482	0.2673	0.0376	0.2184	0.1882	0.0257	0.0105	0.0224	0.0036	0.1303	0.1384	0.0016	0.0072	0.1113	0.0895		0.6483	0.7091	0.7942	3.145	2.8679	3.5897	1.2501	1.0455	0.8487
	1725		Lysoplasmalogen	1-(1-enyl-palmitoyl)-GPC (P-16:0)*	LC/MS pos late	52474			10917802		1.18	1.83	1.55	0.85	1.11	1.3	1.82	1.78	0.98		0.0204	0.0223	0.0009	0.001	0.0033	0.0013	0.2051	0.1842	0.3484	0.0922	0.0069	0.0014	0.0015	0.0112	0.0013	0.0066	0.7356	0.2902		1.4937	1.7635	2.7321	1.0207	0.8666	1.129	0.511	0.9295	0.9097
	1726			1-(1-enyl-palmitoyl)-GPE (P-16:0)*	LC/MS pos late	39270					1.38	0.96	0.7	0.97	0.76	0.79	2.35	2.47	1.05		0.0043	0.0098	0.5499	0.1426	0.0035	0.0013	0.646	0.3237	0.0241	0.0099	0.0334	0.005	0.0006	0.009	0.0008	0.0055	0.5904	0.2533		1.0979	1.5171	1.0556	0.4498	0.4344	0.3414	0.7294	1.7154	1.7983
	1728			1-(1-enyl-oleoyl)-GPE (P-18:1)*	LC/MS pos late	44621					1.14	0.87	0.76	0.89	0.71	0.8	1.86	1.92	1.03		0.2265	0.1107	0.2783	0.0866	0.0132	0.0036	0.0703	0.1044	0.0013	0.0013	0.0066	0.0014	0.0046	0.0221	0.0049	0.0128	0.6991	0.2793		1.5072	1.7238	1.3089	1.0354	0.9231	0.7403	0.5147	0.9586	0.9882
	1730			1-(1-enyl-stearoyl)-GPE (P-18:0)*	LC/MS polar	39271					2.05	1.07	0.52	1.05	0.57	0.54	1.82	1.98	1.08		0.0006	0.005	0.2809	0.0869	0.0011	0.0006	0.661	0.3282	0.0058	0.0033	0.0005	0.0003	0.0015	0.0112	0.0001	0.0021	0.3722	0.1857		0.5525	1.1325	0.5903	3.1109	3.2639	1.7678	0.49	0.8942	0.9702
	1731		Glycerolipid Metabolism	glycerol	LC/MS neg	15122	C00116	HMDB00131	753		1	0.5	0.5	0.96	1.12	1.16	1.1	0.86	0.78		0.9587	0.2948	0.0005	0.0007	0.0012	0.0006	0.7892	0.3546	0.2981	0.0812	0.1937	0.0229	0.4831	0.3249	0.3721	0.1946	0.0592	0.0634		1.0861	1.0858	0.5409	1.1123	1.069	1.2448	1.0133	1.119	0.8758
	1732			glycerol 3-phosphate	LC/MS pos early	43847	C00093	HMDB00126	754		1.24	1.41	1.13	1.11	1.14	1.03	1.2	1.07	0.89		0.0827	0.0543	0.0087	0.0055	0.1892	0.0291	0.1947	0.18	0.113	0.0356	0.7223	0.0705	0.0838	0.1054	0.2823	0.1626	0.2202	0.1317		0.3693	0.4579	0.5192	0.9386	1.0413	1.0725	1.2067	1.4475	1.2885
	1737			glycerophosphoglycerol	LC/MS polar	48857	C03274		439964		0.95	1.32	1.39	0.78	0.58	0.75	1.18	1.01	0.85		0.4544	0.1854	0.003	0.0024	0.0017	0.0008	0.0129	0.0405	0.0005	0.0009	0.0099	0.0019	0.1575	0.157	0.8966	0.3546	0.0871	0.0789		0.4937	0.4702	0.6532	1.8236	1.4232	1.0637	0.9989	1.1793	1.0047
	1738		Monoacylglycerol	1-myristoylglycerol (14:0)	LC/MS neg	35625	C01885	HMDB11561	79050		2.52	0.94	0.37	0.69	1.39	2	0.95	0.98	1.03		0.1101	0.0668	0.9903	0.2222	0.102	0.018	0.1296	0.1453	0.0268	0.0107	0.0271	0.0042	0.6914	0.392	0.8632	0.3483	0.7913	0.3027		2.3644	5.9507	2.2134	0.6435	0.4458	0.8932	1.0611	1.0064	1.0359
	1739			2-myristoylglycerol (14:0)	LC/MS neg	34383			137938		2.1	0.69	0.33	0.67	1.42	2.13	0.71	0.85	1.2		0.1604	0.0861	0.5046	0.1338	0.0512	0.0105	0.1363	0.1479	0.113	0.0356	0.0005	0.0003	0.2386	0.2075	0.5493	0.2527	0.5923	0.2534		3.0821	6.4818	2.1341	0.604	0.4038	0.8599	1.0812	0.7652	0.9154
	1741			1-pentadecanoylglycerol (15:0)	LC/MS neg	47898			190750		1.24	0.88	0.71	0.85	1.49	1.76	0.69	0.89	1.28		0.7007	0.2398	0.8282	0.1924	0.555	0.0678	0.4063	0.2582	0.22	0.0638	0.0964	0.0124	0.0905	0.111	0.383	0.198	0.2617	0.1463		1.4225	1.7587	1.2482	0.4812	0.4076	0.7164	1.1215	0.7759	0.9953
	1742			1-palmitoylglycerol (16:0)	LC/MS neg	21127		HMDB31074	14900		1.25	0.54	0.43	0.92	1.33	1.45	1.1	1.19	1.08		0.5866	0.2131	0.2403	0.0759	0.0735	0.0137	0.7174	0.339	0.266	0.074	0.1813	0.0217	0.7208	0.4015	0.6588	0.2882	0.8926	0.3259		2.076	2.5954	1.1143	0.6291	0.5796	0.8396	1.0658	1.174	1.2635
	1743			2-palmitoylglycerol (16:0)	LC/MS neg	33419		HMDB11533	123409		0.98	0.41	0.42	0.94	1.26	1.34	0.94	0.84	0.89		0.9834	0.3001	0.0527	0.023	0.0518	0.0106	0.754	0.3474	0.2645	0.0738	0.2138	0.0248	0.6665	0.3864	0.1742	0.1152	0.5865	0.2533		3.8874	3.827	1.6052	0.7189	0.678	0.9055	1.1503	1.0846	0.9644
	1744			1-margaroylglycerol (17:0)	LC/MS neg	34391			107036		2.33	0.79	0.34	0.49	1.64	3.33	0.54	0.67	1.22		0.3925	0.167	0.6546	0.1636	0.2503	0.0357	0.0192	0.0492	0.0368	0.0137	0.0014	0.0005	0.1738	0.166	0.3515	0.188	0.597	0.2543		0.9036	2.104	0.7143	0.6903	0.3408	1.1348	1.52	0.8271	1.013
	1747			1-oleoylglycerol (18:1)	LC/MS neg	21184		HMDB11567	5283468		2.31	0.78	0.34	1.11	1.83	1.65	0.94	1.04	1.11		0.2114	0.1052	0.4795	0.1288	0.1295	0.0214	0.5373	0.2966	0.0088	0.0045	0.0136	0.0024	0.6469	0.3812	0.8992	0.3549	0.5906	0.2533		1.9572	4.5294	1.5326	0.694	0.7707	1.2719	0.6178	0.5782	0.6413
	1748			2-oleoylglycerol (18:1)	LC/MS neg	21232			5319879		1.99	0.67	0.34	1.1	1.35	1.22	1	1.1	1.11		0.2048	0.1039	0.4315	0.1186	0.0694	0.0132	0.5628	0.3044	0.0595	0.0207	0.1972	0.0232	0.7432	0.4068	0.3458	0.187	0.4925	0.2215		2.8181	5.5985	1.8954	0.8275	0.9119	1.1151	0.5906	0.5878	0.6516
	1749			1-linoleoylglycerol (18:2)	LC/MS neg	27447			5283469		2.34	1.02	0.44	0.85	2.09	2.47	0.98	0.83	0.85		0.1301	0.0747	0.7581	0.1807	0.1437	0.0232	0.3777	0.2496	0.03	0.0116	0.019	0.0032	0.7791	0.4176	0.4188	0.2091	0.7803	0.3002		2.3941	5.5976	2.4477	0.4962	0.4207	1.0379	1.0061	0.9893	0.8373
	1750			2-linoleoylglycerol (18:2)	LC/MS neg	32506		HMDB11538	5365676		1.6	0.74	0.46	1.05	1.07	1.02	2.33	1.14	0.49		0.2862	0.1315	0.6743	0.1671	0.0927	0.0167	0.7616	0.3487	0.9076	0.2098	0.8782	0.0838	0.339	0.2564	0.4138	0.2081	0.4657	0.214		3.9183	6.2815	2.917	0.3178	0.3349	0.3403	0.8074	1.879	0.9186
	1752			1-arachidonylglycerol (20:4)	LC/MS neg	34397	C13857	HMDB11572	5282281		1.2	0.7	0.58	1	1.15	1.15	1.1	1.35	1.23		0.7598	0.252	0.6135	0.1553	0.3999	0.0515	---	---	0.391	0.101	0.391	0.0412	0.7099	0.399	0.3212	0.177	0.4557	0.2114		1.7063	2.0537	1.1981	0.3599	0.3599	0.4156	0.8422	0.9264	1.1361
	1753			2-arachidonoylglycerol (20:4)	LC/MS neg	19266	C13856	HMDB04666	5282280		0.65	0.57	0.88	1	1	1	1.02	1.24	1.21		0.409	0.1726	0.3403	0.0983	0.8386	0.0946	---	---	---	---	---	---	0.8541	0.4411	0.328	0.1792	0.3662	0.1837		2.1281	1.3922	1.2215	0.3439	0.3439	0.3439	0.6891	0.702	0.8519
	1757			1-docosahexaenoylglycerol (22:6)	LC/MS neg	35153		HMDB11587			0.83	1.28	1.54	1.46	7.76	5.32	0.88	0.8	0.91		0.9871	0.3006	0.3964	0.111	0.1605	0.0254	0.7377	0.3429	0.0004	0.0008	0.014	0.0025	0.6857	0.3905	0.515	0.2404	0.8993	0.3278		1.1666	0.9661	1.4877	0.2	0.2915	1.5522	1.2112	1.066	0.965
	1761			1-palmitoleoylglycerol (16:1)*	LC/MS neg	52431					2.1	0.95	0.45	1.22	2.94	2.4	1.82	1.33	0.73		0.1554	0.0839	0.8699	0.1997	0.1334	0.022	0.5141	0.2911	0.0015	0.0014	0.0144	0.0025	0.2799	0.2267	0.348	0.1872	0.6446	0.2664		2.9439	6.1818	2.7952	0.1752	0.2143	0.5153	0.8658	1.5759	1.15
	1762			2-palmitoleoylglycerol (16:1)*	LC/MS neg	52432					1.29	0.57	0.44	0.92	1.77	1.92	1.6	0.91	0.57		0.4747	0.1899	0.5212	0.1369	0.0735	0.0137	0.9413	0.3986	0.1587	0.0481	0.1238	0.0156	0.6217	0.3715	0.4959	0.2342	0.9472	0.3412		5.8537	7.5328	3.3404	0.1278	0.1175	0.2259	0.7459	1.1952	0.6756
	1770		Diacylglycerol	1-palmitoleoyl-2-oleoyl-glycerol (16:1/18:1)*	LC/MS pos late	52632		HMDB07131	9543694		1	1.77	1.77	1.16	7.48	6.45	5.9	6.47	1.1		0.771	0.2535	0.3434	0.099	0.27	0.0377	0.391	0.2516	0.0005	0.0008	3.585e-05	8.0823e-05	0.0009	0.0102	0.0018	0.0076	0.5362	0.2354		0.3529	0.354	0.626	0.1568	0.1819	1.1724	0.2133	1.2577	1.3804
	1772			1-oleoyl-3-linoleoyl-glycerol (18:1/18:2)	LC/MS pos late	46799					0.66	0.97	1.46	0.71	1.53	2.15	1.05	0.92	0.87		0.0353	0.0326	0.8741	0.2003	0.0304	0.007	0.0096	0.0343	0.0004	0.0008	0.0002	0.0002	0.5239	0.3438	0.2888	0.1645	0.0788	0.075		1.1694	0.7761	1.1319	1.191	0.8504	1.8255	0.9607	1.0125	0.8836
	1773			1-palmitoleoyl-3-oleoyl-glycerol (16:1/18:1)*	LC/MS pos late	52631					0.62	0.85	1.37	0.67	1.31	1.96	1.64	1.56	0.95		0.0065	0.0119	0.1552	0.0544	0.0242	0.006	0.014	0.0411	0.0202	0.0086	0.0032	0.0008	0.0056	0.0243	0.0083	0.0183	0.6261	0.2626		1.001	0.6215	0.8501	0.9617	0.6435	1.2591	0.9455	1.5474	1.4731
	1775			1-palmitoyl-3-linoleoyl-glycerol (16:0/18:2)*	LC/MS pos late	52634					0.8	0.67	0.84	0.87	1.1	1.26	1.23	1.06	0.86		0.0647	0.0465	0.0059	0.004	0.1153	0.0198	0.0738	0.1057	0.2318	0.0665	0.0125	0.0023	0.0578	0.0838	0.3776	0.1968	0.11	0.0889		1.3673	1.0932	0.9218	0.8118	0.7071	0.893	1.022	1.2562	1.082
	1778		Sphingolipid Metabolism	N-palmitoyl-sphinganine (d18:0/16:0)	LC/MS pos late	52604		HMDB11760	5283572		0.68	0.49	0.72	1.3	0.81	0.63	2.27	2.88	1.27		0.0195	0.0216	0.0015	0.0014	0.003	0.0012	0.0316	0.0636	0.0284	0.0112	0.0027	0.0008	0.0063	0.0253	0.0001	0.0021	0.1887	0.1199		0.4852	0.3304	0.239	1.8113	2.3499	1.4758	0.444	1.0077	1.2785
	1779			sphinganine	LC/MS pos late	17769	C00836	HMDB00269	3126		0.82	0.47	0.57	1.1	0.3	0.27	1.06	0.99	0.93		0.06	0.0442	0.0001	0.0003	0.0027	0.0011	0.2737	0.2111	0.0007	0.0011	0.0006	0.0003	0.5597	0.3537	0.89	0.3538	0.5501	0.2398		0.7193	0.5886	0.3378	1.7454	1.9274	0.5286	1.1982	1.2739	1.1861
	1780			phytosphingosine	LC/MS pos late	1510	C12144	HMDB04610	122121		0.65	0.8	1.23	0.81	0.63	0.78	1.12	1.13	1.01		0.0166	0.0195	0.129	0.048	0.0283	0.0067	0.0495	0.0855	0.0037	0.0024	0.0003	0.0003	0.3711	0.2729	0.1693	0.1131	0.8561	0.3182		1.2433	0.8132	0.9972	1.5761	1.273	0.9951	0.8426	0.9436	0.9551
	1782			palmitoyl sphingomyelin (d18:1/16:0)	LC/MS pos late	37506			9939941		0.8	1.22	1.53	0.85	0.98	1.14	1.09	0.89	0.82		0.0499	0.0405	0.0453	0.0203	0.0045	0.0016	0.0083	0.0324	0.5506	0.1368	0.0142	0.0025	0.389	0.2802	0.2015	0.129	0.0388	0.0528		1.0571	0.8442	1.2923	2.6537	2.2631	2.5898	0.7184	0.7807	0.6375
	1783			stearoyl sphingomyelin (d18:1/18:0)	LC/MS pos late	19503	C00550	HMDB01348	6453725		0.82	1.1	1.35	0.65	0.96	1.49	1.31	1.04	0.8		0.0682	0.0477	0.2421	0.0761	0.0078	0.0024	0.0003	0.0096	0.4996	0.1252	0.0004	0.0003	0.0222	0.0475	0.527	0.2443	0.0172	0.0344		1.0087	0.8231	1.1103	3.8115	2.4648	3.6719	0.355	0.4636	0.3707
	1784			sphingomyelin (d18:1/18:1, d18:2/18:0)	LC/MS pos late	37529			6443882		0.89	1.16	1.3	0.61	0.96	1.57	1.39	1.14	0.82		0.3623	0.1575	0.1297	0.048	0.0483	0.01	0.0004	0.0105	0.4668	0.1177	0.0005	0.0003	0.0116	0.0344	0.4671	0.2237	0.1781	0.1158		1.0017	0.8938	1.1664	2.1231	1.2967	2.0405	0.1863	0.2581	0.2116
	1788			sphingosine	LC/MS pos late	17747	C00319	HMDB00252	5353955		0.62	0.37	0.6	0.7	0.3	0.43	1.13	1	0.89		0.0062	0.0115	0.001	0.0011	0.0002	0.0002	0.0056	0.0271	5.3743e-05	0.0004	0.0008	0.0004	0.2593	0.2184	0.9877	0.3787	0.2545	0.1434		1.3194	0.8125	0.4879	1.5176	1.0615	0.4604	0.9759	1.1013	0.9764
	1796			N-palmitoyl-sphingosine (d18:1/16:0)	LC/MS pos late	44877		HMDB04949	5283564		0.76	1.68	2.2	0.88	1.27	1.45	1.08	0.88	0.82		0.026	0.0261	0.0006	0.0007	0.0003	0.0003	0.0418	0.0791	0.0004	0.0008	0.0014	0.0005	0.4382	0.3072	0.1242	0.0907	0.0619	0.0638		0.6631	0.5056	1.1133	1.0395	0.913	1.3215	1.0248	1.1071	0.9066
	1798			sphingomyelin (d18:1/14:0, d16:1/16:0)*	LC/MS pos late	42463			11433862		0.8	1.32	1.66	0.88	1.22	1.38	1.15	0.96	0.84		0.071	0.0486	0.0343	0.0164	0.0001	0.0002	0.256	0.2039	0.0744	0.0247	4.264e-05	8.3495e-05	0.1898	0.1748	0.7748	0.3215	0.0143	0.0314		1.0394	0.8265	1.3681	1.4894	1.3178	1.8237	0.6161	0.7056	0.5941
	1799			sphingomyelin (d18:2/14:0, d18:1/14:1)*	LC/MS pos late	47154					0.77	1.24	1.61	0.85	1.16	1.37	1.45	1.37	0.95		0.033	0.0312	0.0524	0.023	0.0003	0.0003	0.4247	0.2622	0.3453	0.0918	0.0195	0.0032	0.0129	0.0352	0.031	0.0362	0.6612	0.2691		1.117	0.8593	1.386	1.348	1.1433	1.5656	0.4883	0.7058	0.6691
	1800			sphingomyelin (d18:1/24:1, d18:2/24:0)*	LC/MS pos late	47153					0.81	1.17	1.45	0.85	0.85	1.01	1.32	1.06	0.81		0.0821	0.0541	0.1508	0.0532	0.0006	0.0004	0.1225	0.1404	0.1388	0.0427	0.9018	0.0857	0.0231	0.0483	0.4375	0.2152	0.0052	0.0238		1.0143	0.817	1.1823	3.4178	2.894	2.9154	0.1811	0.2385	0.1926
	1801			sphingomyelin (d18:2/16:0, d18:1/16:1)*	LC/MS pos late	42459					0.78	1.07	1.38	0.88	0.91	1.03	1.35	1.19	0.88		0.0554	0.043	0.4481	0.1223	0.002	0.0009	0.275	0.2113	0.4191	0.1075	0.4371	0.0452	0.0301	0.0568	0.1206	0.0901	0.1087	0.0886		1.0394	0.8066	1.1121	1.4552	1.2818	1.326	0.3681	0.4951	0.4375
	1802			sphingomyelin (d18:1/20:1, d18:2/20:0)*	LC/MS pos late	48491					0.81	0.92	1.14	0.76	1.21	1.59	1.76	1.43	0.81		0.1378	0.0772	0.5573	0.1438	0.2037	0.0304	0.0046	0.0268	0.0086	0.0044	0.0003	0.0003	0.0048	0.0221	0.0052	0.0136	0.1407	0.1009		1.1367	0.9218	1.0496	2.8364	2.1696	3.4409	0.2566	0.4506	0.3666
	1803			behenoyl sphingomyelin (d18:1/22:0)*	LC/MS pos late	48492					0.83	1.11	1.34	0.83	1.08	1.29	1.44	1.14	0.79		0.1301	0.0747	0.2997	0.0911	0.0027	0.0011	0.1131	0.1344	0.3343	0.0891	0.0244	0.0039	0.0127	0.0352	0.1389	0.098	0.0547	0.0607		1.0041	0.8333	1.1139	3.945	3.2924	4.2533	0.3732	0.5357	0.4245
	1804			sphingomyelin (d18:1/22:1, d18:2/22:0, d16:1/24:1)*	LC/MS pos late	48493					0.79	1.09	1.38	0.89	1.26	1.41	1.72	1.43	0.83		0.0386	0.0339	0.3253	0.0961	0.0058	0.0019	0.2131	0.1871	0.0346	0.0131	0.0004	0.0003	0.0025	0.0145	0.0112	0.0209	0.0058	0.0238		1.0208	0.8057	1.109	1.2071	1.0727	1.5158	0.1943	0.3346	0.2783
	1805			sphingomyelin (d18:1/20:0, d16:1/22:0)*	LC/MS pos late	48490					0.82	1	1.22	0.86	1.16	1.35	1.46	1.2	0.82		0.0718	0.0489	0.9314	0.2106	0.0251	0.0061	0.2058	0.1842	0.1554	0.0473	0.003	0.0008	0.0036	0.019	0.0448	0.0461	0.0361	0.0527		1.0416	0.857	1.0443	3.1994	2.7566	3.7149	0.4091	0.5965	0.4898
	1806			palmitoyl dihydrosphingomyelin (d18:0/16:0)*	LC/MS pos late	52434			9939965		1.09	0.93	0.85	1.18	0.64	0.54	2.23	2.1	0.94		0.4348	0.1807	0.4941	0.1316	0.1275	0.0212	0.1605	0.1574	0.009	0.0046	0.0003	0.0002	0.0025	0.0145	0.0029	0.0101	0.7208	0.2862		0.9058	0.9843	0.8379	10.8812	12.8903	6.9356	0.4472	0.9978	0.9406
	1807			sphingomyelin (d18:1/15:0, d16:1/17:0)*	LC/MS pos late	52433					0.77	1.14	1.48	0.87	1.07	1.23	1.19	1.04	0.88		0.0289	0.028	0.1782	0.0612	0.0017	0.0008	0.2278	0.1927	0.4443	0.1136	0.0063	0.0013	0.0719	0.0936	0.5502	0.2527	0.0505	0.0589		1.0283	0.7913	1.1686	1.2765	1.109	1.3672	0.4128	0.4905	0.4296
	1808			sphingomyelin (d18:1/21:0, d17:1/22:0, d16:1/23:0)*	LC/MS pos late	52495					0.79	0.96	1.21	0.79	1.44	1.83	1.7	1.52	0.89		0.07	0.0484	0.7031	0.1718	0.0472	0.0098	0.0475	0.0847	0.0084	0.0044	0.0001	0.0002	0.472	0.3203	0.0168	0.0256	0.8625	0.3188		1.9049	1.4985	1.8197	0.9512	0.7514	1.3715	0.4003	0.6809	0.6067
	1809			sphingomyelin (d18:2/23:0, d18:1/23:1, d17:1/24:1)*	LC/MS pos late	52435					0.77	1.09	1.42	0.74	1.09	1.46	1.59	1.35	0.85		0.0383	0.0339	0.335	0.0978	0.0023	0.0009	0.0237	0.0551	0.3308	0.0885	0.0002	0.0002	0.0052	0.0234	0.0257	0.0327	0.0115	0.0293		1.0923	0.8402	1.1946	1.41	1.0496	1.5335	0.2255	0.359	0.3042
	1810			sphingomyelin (d18:2/24:1, d18:1/24:2)*	LC/MS pos late	52437					0.74	1.14	1.53	0.78	0.97	1.23	1.6	1.33	0.83		0.0271	0.0269	0.2026	0.0659	0.0016	0.0008	0.0212	0.0523	0.684	0.1665	0.0083	0.0016	0.0076	0.0281	0.0308	0.0362	0.0199	0.0367		1.025	0.763	1.1677	1.49	1.1652	1.439	0.1656	0.2653	0.221
	1811			tricosanoyl sphingomyelin (d18:1/23:0)*	LC/MS pos late	52436					0.8	1.16	1.44	0.76	1.11	1.45	1.7	1.47	0.86		0.0806	0.0534	0.133	0.0485	0.0087	0.0026	0.0183	0.0478	0.215	0.0625	0.0029	0.0008	0.0034	0.0187	0.014	0.0237	0.0371	0.0527		0.9666	0.7761	1.1194	1.4596	1.1102	1.6153	0.2294	0.391	0.3374
	1812			sphingomyelin (d18:1/17:0, d17:1/18:0, d19:1/16:0)	LC/MS pos late	52615					0.74	1.03	1.39	0.71	1.09	1.54	1.39	1.23	0.89		0.1438	0.0784	0.6662	0.1659	0.1105	0.0191	0.0196	0.0495	0.3194	0.0859	5.3114e-05	9.0841e-05	0.0168	0.0397	0.0669	0.0602	0.1638	0.1122		1.0124	0.7534	1.0447	2.9887	2.1211	3.2701	0.5937	0.8234	0.7294
	1815			glycosyl-N-stearoyl-sphingosine	LC/MS pos late	52234					0.7	0.97	1.39	0.7	0.97	1.38	0.94	0.7	0.75		0.0098	0.0148	0.8088	0.1899	0.0008	0.0005	0.0077	0.032	0.7784	0.1865	0.0026	0.0007	0.6131	0.3715	0.024	0.0326	0.0049	0.0238		1.1271	0.7898	1.097	0.4436	0.3122	0.4313	1.518	1.4271	1.0647
	1816			glycosyl-N-palmitoyl-sphingosine	LC/MS pos late	53013					0.62	0.91	1.46	0.9	0.99	1.09	1.1	0.91	0.83		0.0048	0.0106	0.3395	0.0983	0.0098	0.0029	0.1521	0.1538	0.8424	0.1986	0.1862	0.0222	0.3548	0.2646	0.2461	0.1482	0.0823	0.0761		1.1535	0.7174	1.0464	0.2144	0.1935	0.2118	1.5841	1.7478	1.4434
	1817			lactosyl-N-palmitoyl-sphingosine	LC/MS pos late	53010					0.86	0.97	1.13	0.93	0.9	0.98	1	0.83	0.84		0.1516	0.0821	0.7891	0.1866	0.1379	0.0225	0.3713	0.247	0.2136	0.0622	0.6993	0.0687	0.9333	0.4642	0.0161	0.025	0.0888	0.0796		1.0383	0.8968	1.0123	0.6801	0.6297	0.6144	3.417	3.4084	2.8462
	1820		Mevalonate Metabolism	3-hydroxy-3-methylglutarate	LC/MS polar	531	C03761	HMDB00355	1662		0.64	0.61	0.95	1.24	0.33	0.27	1.4	1.2	0.86		0.0048	0.0106	0.0026	0.0022	0.5493	0.0674	0.038	0.0737	0.0021	0.0017	0.0024	0.0007	0.1122	0.1275	0.2812	0.1626	0.3791	0.1876		1.4735	0.9493	0.8984	2.7648	3.4227	0.9164	0.6771	0.9466	0.8112
	1832		Sterol	cholesterol	LC/MS pos late	63	C00187	HMDB00067	11025495		0.95	1.22	1.29	0.97	0.95	0.98	1.25	1.05	0.84		0.5718	0.2105	0.047	0.0208	0.0165	0.0044	0.7415	0.3438	0.6017	0.1477	0.884	0.0842	0.075	0.0966	0.5776	0.263	0.0411	0.054		0.8988	0.8502	1.097	1.2477	1.2096	1.1894	0.7558	0.9448	0.7905
	1834			7-dehydrocholesterol	LC/MS pos late	1099	C01164	HMDB00032	439423		1.76	0.73	0.42	0.54	0.7	1.31	1.26	0.91	0.72		0.0986	0.061	0.479	0.1288	0.0283	0.0067	0.0752	0.1069	0.2613	0.0733	0.217	0.0249	0.1895	0.1748	0.3276	0.1792	0.0866	0.0788		0.5603	0.9886	0.4105	0.4528	0.2427	0.3191	22.6792	28.6736	20.6973
	1855			campesterol	LC/MS pos late	33997	C01789	HMDB02869	173183		1.48	1	0.67	0.85	0.08	0.09	2.7	2.65	0.98		0.0706	0.0485	---	---	0.0706	0.0134	0.5808	0.3074	0.0009	0.0011	2.2528e-05	7.1755e-05	0.0047	0.0221	0.0086	0.0187	0.9732	0.3459		0.0868	0.1286	0.0868	1.1331	0.959	0.0868	0.6052	1.6347	1.6037
	1873			7-hydroxycholesterol (alpha or beta)	LC/MS pos late	47890					0.93	1.19	1.28	0.63	0.7	1.11	1.14	0.99	0.86		0.5609	0.2083	0.0942	0.0371	0.0718	0.0136	0.0413	0.0788	0.091	0.0295	0.2186	0.025	0.4946	0.3291	0.8474	0.346	0.4003	0.193		0.945	0.8794	1.1238	2.5655	1.6228	1.8013	0.564	0.6448	0.5561
	2002		Primary Bile Acid Metabolism	glycochenodeoxycholate	LC/MS neg	32346	C05466	HMDB00637	12544		1	3.37	3.37	1.44	3.09	2.15	1.95	1.3	0.67		---	---	0.0006	0.0007	0.0006	0.0004	0.0802	0.1119	0.0008	0.0011	0.0036	0.0009	0.0157	0.0389	0.1656	0.1117	0.0318	0.049		0.4662	0.4662	1.5717	0.4662	0.669	1.4405	0.5789	1.1305	0.7527
	2092		Fatty Acid Metabolism (Acyl Choline)	palmitoylcholine	LC/MS pos late	52944			151731		1.84	8.46	4.59	1.02	3.96	3.9	0.82	1.25	1.52		0.0096	0.0146	0.0001	0.0002	6.5826e-06	3.1528e-05	0.9116	0.3918	1.2687e-05	0.0002	1.7188e-05	6.3886e-05	0.0873	0.1076	0.2438	0.1479	0.0521	0.0602		0.5016	0.924	4.2412	0.4222	0.4287	1.6734	1.1606	0.9534	1.4495
	2600	Nucleotide	Purine Metabolism, (Hypo)Xanthine/Inosine containing	AICA ribonucleotide	LC/MS pos early	38325	C04677	HMDB01517	65110		0.38	0.98	2.62	0.39	0.42	1.1	1.38	1.6	1.16		0.0105	0.0153	0.8689	0.1997	0.0051	0.0017	0.012	0.0401	0.0204	0.0086	0.2309	0.0261	0.1569	0.157	0.0114	0.021	0.4014	0.1931		1.0083	0.3793	0.9926	3.304	1.2743	1.3957	0.6464	0.8909	1.037
	2603			inosine 5'-monophosphate (IMP)	LC/MS pos early	2133	C00130	HMDB00175	8582		0.6	0.64	1.08	0.93	0.48	0.52	1.09	1.1	1.02		0.0066	0.0119	0.0142	0.0078	0.3855	0.0506	0.5001	0.286	0.0027	0.002	0.0082	0.0016	0.5276	0.3438	0.4123	0.2081	0.8677	0.3194		0.8068	0.4811	0.5184	1.111	1.0367	0.5364	1.1448	1.2429	1.2638
	2604			inosine	LC/MS pos early	1123	C00294	HMDB00195	6021		0.7	0.7	0.99	0.53	0.3	0.56	0.91	0.65	0.71		0.1183	0.0694	0.017	0.009	0.8285	0.0938	0.002	0.0198	6.6282e-05	0.0004	0.0046	0.0011	0.4416	0.3077	0.0097	0.02	0.0057	0.0238		1.5803	1.114	1.1034	2.3149	1.2355	0.6886	0.9093	0.8296	0.5881
	2605			hypoxanthine	LC/MS neg	3127	C00262	HMDB00157	790		0.7	0.99	1.42	0.73	0.46	0.63	0.98	0.71	0.72		0.0021	0.0067	0.9314	0.2106	0.0025	0.001	0.0068	0.0301	7.814e-05	0.0004	0.0002	0.0002	0.7146	0.3998	0.002	0.0084	0.0005	0.0119		1.2727	0.8909	1.2663	1.9989	1.4623	0.9189	0.904	0.8825	0.6395
	2606			xanthine	LC/MS neg	3147	C00385	HMDB00292	1188		1.37	1.57	1.14	0.82	10.64	13.05	1.9	1.58	0.83		0.0388	0.0339	0.0077	0.0051	0.3305	0.045	0.2641	0.2066	3.4451e-07	4.093e-05	0.0002	0.0002	0.0082	0.029	0.0424	0.0448	0.2765	0.1529		8.0807	11.0865	12.6599	0.9535	0.7773	10.1406	0.259	0.4921	0.4084
	2607			xanthosine 5'-monophosphate (xmp)	LC/MS neg	12024	C00655	HMDB01554	73323		9.42	16.29	1.73	2.14	123.45	57.76	1.15	1.35	1.18		6.5901e-06	0.0011	1.8837e-06	3.0509e-05	0.0122	0.0035	0.0064	0.0296	3.1902e-06	9.4755e-05	2.5922e-08	1.2857e-06	0.4426	0.3077	0.1323	0.0949	0.3936	0.1903		1.2814	12.0679	20.879	0.5039	1.077	62.2046	0.2937	0.3375	0.3972
	2608			xanthosine	LC/MS pos early	15136	C01762	HMDB00299	64959		9.9	22.24	2.25	1.34	103.73	77.5	1.07	1.74	1.63		0.002	0.0066	8.3076e-05	0.0002	0.0274	0.0066	0.2311	0.1943	0.0002	0.0007	5.5316e-07	1.1455e-05	0.6861	0.3905	0.082	0.0692	0.118	0.092		1.2669	12.5458	28.1803	0.6571	0.8795	68.1601	0.1935	0.2072	0.3369
	2611			2'-deoxyinosine	LC/MS neg	15076	C05512	HMDB00071	65058		1.08	0.67	0.62	0.56	0.39	0.69	1.04	0.68	0.65		0.7889	0.2563	0.0024	0.0021	0.4028	0.0516	0.0036	0.0243	0.0015	0.0014	0.0037	0.0009	0.3025	0.2397	3.9979e-05	0.0014	6.7726e-05	0.0105		1.5244	1.6481	1.0268	2.5668	1.4352	0.9909	0.8123	0.8478	0.5547
	2614			allantoin	LC/MS polar	1107	C02350	HMDB00462	204		0.77	1.2	1.57	0.99	0.91	0.92	0.98	0.89	0.91		0.004	0.0097	0.027	0.0135	0.0004	0.0003	0.8836	0.3866	0.206	0.0604	0.2016	0.0235	0.7373	0.4063	0.0795	0.0679	0.2092	0.128		1.0685	0.8222	1.2868	1.1841	1.1718	1.0741	0.4637	0.454	0.4128
	2615			allantoic acid	LC/MS polar	33434	C00499	HMDB01209	203		0.65	1.39	2.13	0.94	0.86	0.91	1.04	0.86	0.83		0.0004	0.005	0.0014	0.0014	7.1992e-06	3.1528e-05	0.5796	0.3074	0.237	0.0675	0.3226	0.0352	0.7595	0.4132	0.2945	0.1655	0.1148	0.0904		1.1231	0.734	1.5638	1.1908	1.1186	1.0187	0.6218	0.6443	0.5348
	2618		Purine Metabolism, Adenine containing	adenosine 5'-diphosphate (ADP)	LC/MS neg	3108	C00008	HMDB01341	6022		0.91	0.72	0.8	0.79	0.58	0.74	0.89	0.61	0.68		0.6032	0.2165	0.1056	0.0408	0.1384	0.0225	0.0265	0.0581	0.0125	0.0058	0.0639	0.0086	0.7039	0.3964	0.0835	0.0699	0.0824	0.0761		0.8467	0.7668	0.6101	1.1404	0.9048	0.6671	3.322	2.9693	2.0337
	2619			adenosine 5'-monophosphate (AMP)	LC/MS neg	32342	C00020	HMDB00045	6083		0.71	0.78	1.1	0.98	0.7	0.71	1.04	0.83	0.8		0.011	0.0155	0.0163	0.0087	0.2849	0.0395	0.7995	0.3578	0.0038	0.0025	0.0056	0.0012	0.6678	0.3864	0.0721	0.063	0.0258	0.0422		0.9071	0.6432	0.7078	1.3018	1.2802	0.9071	1.147	1.1915	0.9527
	2620			adenosine 3'-monophosphate (3'-AMP)	LC/MS neg	35142	C01367	HMDB03540	41211		0.95	0.32	0.34	0.49	0.33	0.68	0.58	0.39	0.67		0.4137	0.1742	0.0024	0.0021	0.2388	0.0342	0.0155	0.0441	0.0293	0.0114	0.2431	0.0273	0.0225	0.0479	0.0021	0.0087	0.0215	0.0382		1.3338	1.2683	0.4313	91.1482	44.5339	30.0607	0.9071	0.5261	0.3538
	2621			adenosine 2'-monophosphate (2'-AMP)	LC/MS neg	36815	C00946	HMDB11617	94136		3.48	0.39	0.11	0.41	0.2	0.48	0.71	0.45	0.64		0.606	0.2166	0.0013	0.0013	0.1453	0.0234	0.0003	0.0096	0.0002	0.0005	0.0043	0.001	0.0388	0.0655	0.0011	0.0061	0.0103	0.0293		0.9922	3.4519	0.389	8.8774	3.6107	1.7397	1.1094	0.7827	0.4981
	2622			adenosine 3',5'-cyclic monophosphate (cAMP)	LC/MS neg	2831	C00575	HMDB00058	6076		0.86	0.78	0.91	0.88	0.62	0.7	1.23	0.93	0.76		0.1138	0.0683	0.0178	0.0094	0.1958	0.0296	0.4741	0.2764	0.0268	0.0107	0.0237	0.0038	0.1638	0.1607	0.7073	0.3013	0.0197	0.0367		0.8215	0.7074	0.6415	1.6172	1.4199	1	1.0897	1.3433	1.0173
	2624			adenosine 3',5'-diphosphate	LC/MS neg	15691	C00054	HMDB00061	159296		2.36	0.67	0.28	1.28	1	0.78	0.66	0.45	0.68		0.6217	0.2202	0.3106	0.0936	0.356	0.0483	0.1818	0.1712	---	---	0.1818	0.0217	0.0629	0.0868	0.0292	0.0352	0.1963	0.1233		0.5577	1.3137	0.3738	0.3738	0.4766	0.3738	1.6404	1.0784	0.7355
	2625			adenylosuccinate	LC/MS neg	18360	C03794	HMDB00536	195		0.59	0.11	0.18	1.23	0.26	0.21	0.96	0.7	0.72		0.0599	0.0442	1.8189e-05	8.6207e-05	0.001	0.0006	0.321	0.2292	0.0059	0.0034	0.0042	0.001	0.9568	0.4677	0.1035	0.0806	0.0115	0.0293		1.5231	0.9015	0.1643	0.8829	1.0843	0.2331	1.2493	1.2046	0.873
	2626			adenosine	LC/MS pos early	555	C00212	HMDB00050	60961		0.66	0.68	1.04	0.84	0.49	0.58	1.05	0.86	0.81		0.0286	0.0278	0.0121	0.0069	0.7281	0.0844	0.0189	0.0489	0.0007	0.0011	0.005	0.0011	0.6444	0.3812	0.2916	0.1655	0.0376	0.0527		1.5345	1.0105	1.05	1.9296	1.6147	0.9363	0.8219	0.8632	0.7033
	2627			adenine	LC/MS pos early	554	C00147	HMDB00034	190		0.83	1.32	1.59	0.99	0.62	0.63	1.56	1.48	0.95		0.1864	0.0961	0.0381	0.0177	0.0087	0.0026	0.9153	0.3926	0.0005	0.0008	0.0014	0.0005	0.011	0.0337	0.0154	0.0246	0.6452	0.2664		1.353	1.1201	1.7836	1.1237	1.116	0.7003	0.5633	0.8774	0.8356
	2632			N1-methyladenosine	LC/MS pos early	15650	C02494	HMDB03331	27476		1.17	2.76	2.35	0.69	0.87	1.26	1.09	0.9	0.82		0.238	0.114	0.0002	0.0003	0.0003	0.0003	0.0048	0.0268	0.1302	0.0405	0.0117	0.0022	0.423	0.2998	0.4459	0.2178	0.0661	0.0669		0.8833	1.0368	2.4388	1.4671	1.0097	1.2747	0.6628	0.7253	0.594
	2642			N6-carbamoylthreonyladenosine	LC/MS pos early	35157		HMDB41623	161466		1.05	0.87	0.83	0.89	0.74	0.83	0.83	0.72	0.87		0.5559	0.2077	0.2693	0.084	0.0416	0.0089	0.285	0.2167	0.0264	0.0106	0.0281	0.0044	0.3083	0.2418	0.0453	0.0463	0.453	0.2114		1.8684	1.9683	1.6344	1.0452	0.9284	0.7683	1.0501	0.8763	0.7581
	2645			2'-deoxyadenosine 5'-monophosphate	LC/MS pos early	46333	C00360	HMDB00905	12599		0.71	1.18	1.66	0.92	1.3	1.42	1.39	1.37	0.98		0.0414	0.0353	0.2446	0.0767	0.0054	0.0018	0.6137	0.317	0.0879	0.0288	0.0031	0.0008	0.1779	0.1686	0.1086	0.0833	0.9655	0.3456		1.2705	0.9069	1.5025	0.7098	0.6519	0.9235	1.0802	1.5027	1.475
	2650			diadenosine triphosphate	LC/MS neg	47397	C06197	HMDB01155			0.59	0.78	1.32	0.92	0.85	0.92	1.27	1.01	0.79		0.0053	0.0112	0.0379	0.0177	0.0527	0.0107	0.2364	0.1978	0.0323	0.0123	0.1763	0.0213	0.0919	0.1122	0.8901	0.3538	0.0242	0.0414		1.2068	0.7129	0.9439	0.08	0.0738	0.068	1.9571	2.4892	1.9706
	2651			N6-succinyladenosine	LC/MS pos early	48130		HMDB00912			1.17	1.39	1.19	1.21	1.34	1.11	1.59	1.3	0.82		0.374	0.162	0.0208	0.0108	0.2242	0.0327	0.1233	0.1404	0.0099	0.0049	0.2939	0.0325	0.0026	0.0147	0.0363	0.0404	0.0775	0.0742		0.8285	0.9658	1.1475	0.8304	1.0045	1.1127	0.7178	1.1413	0.9312
	2654		Purine Metabolism, Guanine containing	guanosine 5'- monophosphate (5'-GMP)	LC/MS pos early	2849	C00144	HMDB01397	6804		0.9	1.43	1.6	0.92	1.12	1.22	1.26	1.06	0.84		0.3884	0.1661	0.0188	0.0099	0.0032	0.0012	0.3106	0.2252	0.1599	0.0483	0.0025	0.0007	0.0933	0.1125	0.5574	0.2549	0.1311	0.0981		0.8267	0.7399	1.1824	1.0589	0.9717	1.1879	0.9124	1.1479	0.9633
	2655			guanosine 3'-monophosphate (3'-GMP)	LC/MS neg	39786			3522		1.82	0.79	0.43	0.38	0.25	0.67	0.9	0.82	0.91		0.572	0.2105	0.391	0.1098	0.3629	0.0485	0.0128	0.0405	0.0225	0.0094	0.286	0.0317	0.9221	0.463	0.6898	0.2972	0.6082	0.2568		0.092	0.1674	0.0727	7.7169	2.8956	1.9343	0.1015	0.0918	0.0835
	2659			guanosine	LC/MS pos early	1573	C00387	HMDB00133	6802		0.61	1.25	2.05	0.46	0.41	0.89	0.77	0.59	0.76		0.0676	0.0475	0.2551	0.0798	0.0172	0.0045	0.0038	0.0243	0.0009	0.0011	0.5567	0.056	0.3397	0.2564	0.0732	0.0636	0.1568	0.1093		0.9034	0.5508	1.1282	3.776	1.7272	1.5376	0.9188	0.7074	0.5391
	2660			guanine	LC/MS pos early	32352	C00242	HMDB00132	764		0.83	2.11	2.54	0.57	0.64	1.13	1.04	0.76	0.72		0.1237	0.0718	0.0003	0.0004	6.1236e-05	0.0001	0.0002	0.0075	0.0002	0.0006	0.0896	0.0117	0.5497	0.3524	0.0149	0.0244	0.0009	0.0141		0.7992	0.6658	1.689	3.035	1.725	1.9475	0.9194	0.9599	0.6954
	2662			7-methylguanine	LC/MS pos early	35114	C02242	HMDB00897	11361		0.99	2.02	2.03	0.9	1.28	1.42	1.1	0.88	0.8		0.9924	0.301	0.0037	0.0028	0.0022	0.0009	0.3032	0.2235	0.0388	0.0142	0.0009	0.0004	0.4423	0.3077	0.3645	0.1919	0.0751	0.0731		1.3635	1.3562	2.755	0.9115	0.8182	1.163	0.8059	0.8898	0.7097
	2668			N2,N2-dimethylguanosine	LC/MS pos early	35137		HMDB04824	92919		1.54	2.78	1.8	0.72	2.58	3.58	0.96	0.72	0.75		0.0196	0.0216	0.0002	0.0003	0.0039	0.0014	0.0155	0.0441	9.4094e-05	0.0004	4.3769e-05	8.3495e-05	0.9558	0.4677	0.1428	0.1	0.0328	0.0497		1.5341	2.3666	4.2673	1.0448	0.7546	2.6986	0.5459	0.525	0.3949
	2676			2'-deoxyguanosine	LC/MS neg	1411	C00330	HMDB00085	187790		1.2	0.67	0.56	0.61	0.37	0.6	1.25	0.95	0.76		0.4322	0.1801	0.0009	0.001	0.0395	0.0087	0.0022	0.0204	0.0002	0.0007	0.0003	0.0003	0.0089	0.0308	0.3123	0.1726	0.0034	0.0233		1.4902	1.7865	1.0037	2.0606	1.2607	0.7587	0.6733	0.8444	0.6388
	2680		Pyrimidine Metabolism, Orotate containing	orotate	LC/MS polar	1505	C00295	HMDB00226	967		10.25	1.01	0.1	2.72	3.36	1.24	1	1	1		0.0015	0.0056	0.9297	0.2106	0.0016	0.0008	0.0023	0.0208	0.0008	0.0011	0.2441	0.0274	---	---	---	---	---	---		0.5834	5.9817	0.592	0.5445	1.481	1.8322	0.4037	0.4037	0.4037
	2682			orotidine	LC/MS polar	35172	C01103	HMDB00788	92751		0.69	1.04	1.5	1.19	0.72	0.61	1.23	0.93	0.76		0.0015	0.0056	0.525	0.1374	0.0009	0.0005	0.0159	0.0443	0.0341	0.0129	0.0125	0.0023	0.0778	0.0995	0.4628	0.2228	0.0139	0.0312		1.3631	0.9437	1.4171	0.3025	0.3595	0.218	1.0862	1.3349	1.0095
	2685		Pyrimidine Metabolism, Uracil containing	uridine 5'-triphosphate (UTP)	LC/MS neg	33448	C00075	HMDB00285	6133		1	1	1	1	1	1	0.74	0.46	0.62		---	---	---	---	---	---	---	---	---	---	---	---	0.4495	0.3091	0.0696	0.0616	0.1093	0.0886		0.3821	0.3821	0.3821	0.3821	0.3821	0.3821	1.2733	0.9406	0.5867
	2686			uridine 5'-diphosphate (UDP)	LC/MS neg	5345	C00015	HMDB00295	6031		1.3	0.45	0.35	0.91	0.31	0.34	0.82	0.61	0.74		0.2089	0.105	0.0549	0.0239	0.0247	0.0061	0.4218	0.2622	0.0002	0.0006	0.0002	0.0002	0.4511	0.3091	0.0942	0.0763	0.1689	0.1126		0.5989	0.7777	0.2712	1.1271	1.0304	0.3504	8.7481	7.1567	5.3277
	2687			uridine 5'-monophosphate (UMP)	LC/MS polar	2856	C00105	HMDB00288	6030		0.57	0.45	0.79	1	0.41	0.41	0.93	0.72	0.78		0.0012	0.0051	0.0007	0.0008	0.0272	0.0066	0.9658	0.4024	0.0007	0.0011	0.0021	0.0006	0.5658	0.3556	0.0181	0.0265	0.2119	0.1288		0.8601	0.4893	0.3857	1.2001	1.2038	0.4881	2.6936	2.4942	1.9515
	2689			uridine 3'-monophosphate (3'-UMP)	LC/MS polar	39764	C01368		101543		4.39	0.22	0.05	0.34	0.2	0.59	0.49	0.33	0.68		0.833	0.2653	0.0009	0.001	0.3137	0.043	0.009	0.0339	0.0225	0.0094	0.2099	0.0244	0.0435	0.0712	0.0362	0.0404	0.217	0.1311		0.5693	2.4969	0.1262	129.774	44.3558	26.2314	1.1207	0.5496	0.3742
	2692			uridine	LC/MS neg	606	C00299	HMDB00296	6029		0.72	0.32	0.45	0.75	0.3	0.4	1.1	0.79	0.72		0.0053	0.0112	9.8789e-06	6.8852e-05	4.5424e-06	2.6849e-05	0.0078	0.032	6.6311e-05	0.0004	0.0004	0.0003	0.2773	0.226	0.0478	0.0482	0.0011	0.0141		0.8763	0.6327	0.2829	1.4406	1.0802	0.4333	1.3161	1.4526	1.0393
	2693			uracil	LC/MS pos early	605	C00106	HMDB00300	1174		0.57	0.77	1.36	0.94	0.8	0.85	2.36	3.1	1.32		0.0039	0.0097	0.0126	0.0071	0.0403	0.0087	0.6474	0.3237	0.109	0.0346	0.0294	0.0045	0.0002	0.0064	4.4441e-05	0.0014	0.0335	0.0504		1.3027	0.7408	1.0079	1.7464	1.6404	1.3962	0.2536	0.5977	0.7866
	2694			pseudouridine	LC/MS neg	33442	C02067	HMDB00767	15047		1.12	1.56	1.4	0.81	1.63	2.02	1	0.65	0.65		0.3115	0.1399	0.0045	0.0032	0.021	0.0054	0.1612	0.1574	0.0103	0.005	0.0011	0.0004	0.9748	0.4746	0.012	0.0214	0.0141	0.0312		1.1521	1.2877	1.7979	0.8357	0.6739	1.3588	0.8991	0.8964	0.5856
	2695			5-methyluridine (ribothymidine)	LC/MS neg	35136		HMDB00884	445408		1.33	0.1	0.07	0.99	0.24	0.24	1.39	1.35	0.97		0.0282	0.0277	1.9375e-06	3.0509e-05	3.5499e-08	1.0491e-06	0.7876	0.3546	0.0004	0.0008	0.0007	0.0004	0.0497	0.0792	0.1799	0.1178	0.7525	0.294		1.2788	1.704	0.1259	0.6498	0.6406	0.1548	1.0313	1.4381	1.3927
	2702			5,6-dihydrouracil	LC/MS neg	1559	C00429	HMDB00076	649		0.89	0.53	0.6	1.55	0.26	0.16	1.29	1.22	0.95		0.4445	0.1828	0.0032	0.0025	0.0578	0.0115	0.0258	0.0577	0.0011	0.0012	3.1856e-05	7.5437e-05	0.1212	0.1333	0.0169	0.0256	0.7674	0.2972		0.6114	0.5419	0.3259	1.3143	2.0415	0.336	0.9203	1.1901	1.1263
	2708			3-ureidopropionate	LC/MS pos early	3155	C02642	HMDB00026	111		0.82	0.29	0.36	0.99	0.26	0.27	1.33	1.1	0.83		0.2335	0.1124	0.001	0.001	0.0004	0.0003	0.7821	0.3529	0.0008	0.0011	0.0007	0.0004	0.0511	0.081	0.2481	0.1489	0.1391	0.1006		1.3795	1.1336	0.4042	2.3544	2.3208	0.6207	0.8227	1.0944	0.904
	2709			beta-alanine	LC/MS pos early	55	C00099	HMDB00056	239		0.66	1.75	2.66	0.92	1.26	1.37	1.04	0.92	0.89		0.0168	0.0196	0.0063	0.0042	0.0011	0.0006	0.2564	0.2039	0.0172	0.0074	0.0023	0.0007	0.7724	0.4173	0.4639	0.2228	0.3498	0.1778		0.6707	0.4407	1.1743	1.881	1.7278	2.3675	0.9224	0.9566	0.8495
	2712			uridine 2'-monophosphate (2'-UMP)*	LC/MS neg	52444					1.07	0.82	0.77	0.35	0.14	0.39	1.02	1.34	1.31		0.8745	0.2747	0.391	0.1098	0.391	0.0509	0.0096	0.0343	0.0149	0.0066	0.0881	0.0116	0.9744	0.4746	0.7607	0.3183	0.7833	0.3007		0.064	0.0686	0.0525	5.2508	1.8222	0.7146	0.0764	0.0783	0.1024
	2714		Pyrimidine Metabolism, Cytidine containing	cytidine diphosphate	LC/MS neg	2841	C00112	HMDB01546	6132		0.93	0.89	0.95	1	1	1	1.01	0.72	0.72		0.4414	0.1828	0.2041	0.0659	0.1899	0.0291	---	---	---	---	---	---	0.9188	0.4624	0.2923	0.1655	0.2011	0.1259		0.1513	0.1409	0.134	0.134	0.134	0.134	1.4769	1.491	1.0704
	2715			cytidine 5'-monophosphate (5'-CMP)	LC/MS pos early	2372	C00055	HMDB00095	6131		0.61	0.64	1.05	1.09	0.8	0.74	1.24	1.07	0.86		0.0077	0.0126	0.0101	0.0061	0.5896	0.0704	0.2035	0.1836	0.0284	0.0112	0.0045	0.0011	0.1394	0.1446	0.4877	0.232	0.2139	0.1296		1.4354	0.8778	0.923	0.7548	0.8247	0.6073	1.5289	1.8924	1.6313
	2716			cytidine 3'-monophosphate (3'-CMP)	LC/MS pos early	2959	C05822		66535		1	1	1	0.24	0.19	0.78	1	1	1		---	---	---	---	---	---	0.0039	0.0244	0.0123	0.0057	0.4382	0.0452	---	---	---	---	---	---		0.2552	0.2552	0.2552	3.7379	0.9	0.7027	0.2552	0.2552	0.2552
	2718			cytidine	LC/MS pos early	514	C00475	HMDB00089	6175		0.71	0.36	0.51	0.83	0.45	0.54	1.11	0.75	0.68		0.0232	0.0245	0.0005	0.0006	0.0034	0.0013	0.0538	0.0914	8.7717e-05	0.0004	0.0003	0.0002	0.5806	0.3591	0.0387	0.0426	0.0542	0.0607		37.4097	26.7189	13.594	0.3552	0.2951	0.1597	1.1543	1.2769	0.8665
	2720			3-methylcytidine	LC/MS pos early	35132			159649		0.83	1.84	2.21	0.56	0.48	0.86	0.87	1.15	1.31		0.2753	0.1276	0.0045	0.0032	0.0015	0.0007	0.0738	0.1057	0.0482	0.0169	0.391	0.0412	0.4953	0.3291	0.3083	0.1708	0.0757	0.0732		1.3477	1.1203	2.4744	0.6592	0.3685	0.3182	0.9147	0.7987	1.05
	2721			5-methylcytidine	LC/MS pos early	22119		HMDB00982	92918		1.5	2.05	1.37	1	1	1	1.05	0.58	0.55		0.0187	0.0212	0.0007	0.0008	0.034	0.0077	---	---	---	---	---	---	0.6491	0.3816	0.1318	0.0949	0.0752	0.0731		2.053	3.0742	4.1995	0.0471	0.0471	0.0471	0.1865	0.1961	0.1077
	2726			2'-deoxycytidine 5'-monophosphate	LC/MS pos early	533	C00239	HMDB01202	13945		0.42	0.48	1.14	1.24	0.58	0.47	1.16	1.07	0.92		0.0091	0.0139	0.0088	0.0055	0.4138	0.0528	0.1071	0.1332	0.0052	0.003	0.0005	0.0003	0.4027	0.287	0.5856	0.2648	0.6334	0.2644		1.5941	0.6738	0.7662	0.7401	0.9206	0.4303	2.1032	2.4408	2.2563
	2728			2'-deoxycytidine	LC/MS pos early	15949	C00881	HMDB00014	13711		0.98	0.12	0.12	1.39	0.47	0.34	1	0.67	0.67		0.9902	0.301	0.0025	0.0021	0.0012	0.0006	0.0492	0.0855	0.0079	0.0041	0.0003	0.0003	0.9558	0.4677	0.0061	0.015	0.0039	0.0238		11.1577	10.9786	1.3507	0.4461	0.6215	0.2104	1.0928	1.0977	0.7372
	2730		Pyrimidine Metabolism, Thymine containing	thymidine 5'-monophosphate	LC/MS neg	12023	C00364	HMDB01227	9700		0.69	0.43	0.63	0.94	0.27	0.29	1.32	1.1	0.83		0.0048	0.0106	0.0007	0.0008	0.007	0.0022	0.6594	0.3282	0.0027	0.002	0.0035	0.0009	0.0133	0.0356	0.223	0.1392	0.066	0.0669		1.5698	1.0774	0.6775	1.2471	1.1781	0.3411	0.8742	1.1515	0.9603
	2734			thymidine	LC/MS neg	2183	C00214	HMDB00273	5789		0.93	0.54	0.58	0.49	0.16	0.32	0.81	0.62	0.76		0.4012	0.1702	0.0242	0.0123	0.7537	0.087	0.0241	0.0551	0.0002	0.0006	0.0034	0.0009	0.0424	0.0707	0.0958	0.0767	0.2376	0.138		2.2251	2.0648	1.2031	5.7437	2.8194	0.9008	0.601	0.4868	0.3713
	2735			thymine	LC/MS neg	604	C00178	HMDB00262	1135		1.02	1.15	1.13	0.92	1.09	1.18	2.47	4.46	1.8		0.7845	0.2563	0.1437	0.0515	0.1022	0.018	0.5257	0.2947	0.3593	0.0936	0.0825	0.0109	0.0008	0.0102	6.8251e-05	0.0014	0.0057	0.0238		1.1512	1.1766	1.3294	1.0075	0.93	1.0975	0.1254	0.31	0.559
	2736			5,6-dihydrothymine	LC/MS pos early	1418	C00906	HMDB00079	93556		1.17	0.18	0.15	1.39	0.28	0.2	1.33	1.6	1.2		0.2843	0.131	7.3312e-06	5.4983e-05	7.4438e-06	3.1528e-05	0.0214	0.0523	0.0099	0.0049	0.0063	0.0013	0.0857	0.1066	0.007	0.0159	0.1718	0.1137		0.7585	0.8856	0.1354	1.2131	1.6862	0.3402	0.9398	1.2496	1.5011
	2738			3-aminoisobutyrate	LC/MS pos early	1566	C05145	HMDB03911	64956		0.74	1.6	2.15	0.87	1.03	1.18	0.94	0.56	0.6		0.0365	0.0336	0.0016	0.0015	0.0032	0.0012	0.1213	0.1404	0.7837	0.1874	0.1103	0.014	0.8624	0.4436	0.0567	0.0537	0.04	0.0532		0.8124	0.6042	1.2975	1.194	1.0406	1.2287	1.06	0.9975	0.5971
	2739		Purine and Pyrimidine Metabolism	methylphosphate	LC/MS polar	37070		HMDB61711	13130		0.92	0.98	1.06	0.78	0.64	0.82	0.88	0.55	0.62		0.5655	0.2095	0.7722	0.1837	0.8192	0.0929	0.0282	0.0595	0.0245	0.0101	0.1984	0.0233	0.658	0.3842	0.0573	0.0538	0.082	0.0761		0.726	0.6655	0.7086	1.4849	1.1544	0.95	1.5785	1.3872	0.8614
	2745	Cofactors and Vitamins	Nicotinate and Nicotinamide Metabolism	nicotinamide	LC/MS pos early	594	C00153	HMDB01406	936		0.88	1.3	1.48	0.82	1	1.23	0.86	0.65	0.75		0.3374	0.1483	0.0589	0.0248	0.011	0.0032	0.0016	0.0188	0.9798	0.2234	0.0065	0.0013	0.1571	0.157	0.0024	0.0093	0.0212	0.0382		0.8389	0.7367	1.0885	1.113	0.9073	1.113	1.1788	1.0088	0.7614
	2747			nicotinamide ribonucleotide (NMN)	LC/MS neg	22152	C00455	HMDB00229	14180		0.56	0.4	0.71	0.84	0.4	0.47	1.07	0.86	0.8		0.0008	0.005	0.0268	0.0134	0.1991	0.0298	0.0129	0.0405	2.464e-05	0.0002	0.0001	0.0002	0.309	0.2418	0.0718	0.063	0.0004	0.0106		0.6615	0.3728	0.2645	1.1771	0.9861	0.4659	1.6523	1.7677	1.4162
	2748			nicotinamide riboside	LC/MS pos early	33013	C03150	HMDB00855	439924		0.79	15.48	19.65	1.32	3.97	3	1.29	1.12	0.87		0.2309	0.1118	7.117e-06	5.4983e-05	8.2955e-05	0.0002	0.156	0.1549	0.0024	0.0019	1.2018e-05	6.3711e-05	0.1249	0.1345	0.4096	0.2075	0.2547	0.1434		0.4259	0.3356	6.5938	0.2529	0.3343	1.0029	1.4248	1.8391	1.5926
	2749			nicotinamide adenine dinucleotide (NAD+)	LC/MS neg	5278	C00003	HMDB00902	5893		1.57	1.13	0.72	1.08	0.94	0.87	2.05	1.73	0.84		0.1392	0.0772	0.1959	0.0653	0.2734	0.0381	0.3244	0.2292	0.4537	0.1154	0.0457	0.0065	0.0003	0.0064	0.0004	0.0037	0.1064	0.0878		0.6978	1.0942	0.7897	0.9804	1.0572	0.9222	7.3594	15.0823	12.7252
	2750			nicotinamide adenine dinucleotide reduced (NADH)	LC/MS neg	31475	C00004	HMDB01487	439153		1.01	1.54	1.53	1.07	0.81	0.76	2.16	1.88	0.87		0.9551	0.2942	0.0443	0.02	0.0605	0.0118	0.6305	0.3196	0.3462	0.0918	0.0639	0.0086	0.0102	0.0331	0.0341	0.039	0.3801	0.1877		0.4749	0.4777	0.7329	1.1912	1.2756	0.9664	1.0856	2.3501	2.046
	2762			trigonelline (N'-methylnicotinate)	LC/MS pos early	32401	C01004	HMDB00875	5570		0.91	1	1.1	1.32	1.3	0.99	1.03	0.65	0.63		0.4952	0.1931	0.9894	0.2222	0.4954	0.0616	0.3879	0.2516	0.4135	0.1063	0.961	0.0911	0.7765	0.4173	0.0752	0.0646	0.0235	0.041		0.9529	0.8655	0.9507	0.8985	1.182	1.17	1.5388	1.5882	1.004
	2765			adenosine 5'-diphosphoribose (ADP-ribose)	LC/MS pos early	558	C00301	HMDB01178	192		2.88	4.38	1.52	0.81	1.54	1.9	1.45	1.73	1.19		0.4952	0.1931	9.6333e-05	0.0002	0.1772	0.0276	0.3264	0.2298	0.0471	0.0166	0.0008	0.0004	0.2257	0.2006	0.0069	0.0158	0.3485	0.1777		0.7109	2.0474	3.1156	1.1967	0.9691	1.8394	0.6426	0.9313	1.1111
	2767		Riboflavin Metabolism	riboflavin (Vitamin B2)	LC/MS pos early	1827	C00255	HMDB00244	493570		1.11	0.92	0.83	1.08	0.87	0.81	1.27	1.32	1.05		0.5482	0.206	0.6349	0.1597	0.2597	0.0368	0.5458	0.2998	0.2908	0.0798	0.1105	0.014	0.1784	0.1686	0.1358	0.0961	0.753	0.294		1.1123	1.2376	1.0259	0.8255	0.8901	0.7171	0.8991	1.1393	1.1907
	2768			flavin adenine dinucleotide (FAD)	LC/MS neg	2134	C00016	HMDB01248	643975		0.85	1.09	1.28	0.94	0.84	0.9	1.22	0.97	0.8		0.115	0.0688	0.3307	0.0967	0.0204	0.0053	0.3245	0.2292	0.0423	0.0153	0.1063	0.0136	0.1364	0.1421	0.8853	0.3538	0.0381	0.0527		0.7906	0.6723	0.8595	1.2966	1.2184	1.0908	0.9781	1.1934	0.9527
	2769			flavin mononucleotide (FMN)	LC/MS neg	15797	C00061	HMDB01520	710		0.86	0.85	0.99	0.95	0.58	0.61	1.34	0.98	0.73		0.0984	0.061	0.029	0.0144	0.9123	0.1021	0.6846	0.3324	0.0212	0.0089	0.0294	0.0045	0.043	0.0708	0.9034	0.3558	0.0122	0.0293		0.8994	0.7725	0.7625	1.0807	1.0281	0.6297	1.352	1.8153	1.3232
	2770		Pantothenate and CoA Metabolism	pantothenate	LC/MS pos early	1508	C00864	HMDB00210	6613		0.66	0.64	0.97	1.29	0.9	0.7	0.97	0.74	0.76		0.0055	0.0113	0.0037	0.0028	0.7943	0.0906	0.0488	0.0855	0.3534	0.0929	0.0004	0.0003	0.8537	0.4411	0.0331	0.0381	0.0164	0.0339		1.4562	0.9595	0.9342	0.2596	0.335	0.2329	1.3926	1.3577	1.0297
	2772			phosphopantetheine	LC/MS neg	15504	C01134	HMDB01416	987		1.12	1.99	1.78	1.74	2.13	1.22	1.47	1.09	0.74		0.4722	0.1897	0.0055	0.0037	0.0089	0.0026	0.0009	0.014	0.0001	0.0005	0.0485	0.0068	0.0078	0.0282	0.2524	0.1506	0.0214	0.0382		0.8671	0.9699	1.729	1.522	2.6532	3.2482	0.2071	0.3037	0.2257
	2773			3'-dephosphocoenzyme A	LC/MS neg	18289	C00882	HMDB01373	444485		0.98	0.57	0.58	2.85	2.06	0.72	1.54	1.13	0.73		0.5567	0.2077	0.0051	0.0035	0.4529	0.0571	0.0001	0.0067	0.001	0.0012	0.0009	0.0004	0.0037	0.0194	0.1862	0.1203	0.0015	0.0144		1.7047	1.6665	0.9694	0.8623	2.4555	1.7742	0.623	0.9594	0.7034
	2774			coenzyme A	LC/MS neg	46322	C00010	HMDB01423	317		0.95	0.54	0.57	3.06	1.53	0.5	1.25	1.09	0.87		0.5567	0.2077	0.0052	0.0036	0.0087	0.0026	0.0006	0.0128	0.0136	0.0062	0.0065	0.0013	0.0569	0.0838	0.4258	0.2104	0.1183	0.092		1.064	1.0078	0.5724	0.3018	0.9241	0.4627	1.4921	1.8618	1.6194
	2780		Ascorbate and Aldarate Metabolism	threonate	LC/MS polar	27738	C01620	HMDB00943	151152		1.02	1.38	1.35	1.15	0.71	0.62	1.29	0.66	0.51		0.9001	0.2805	0.361	0.1031	0.3625	0.0485	0.6356	0.3203	0.9613	0.2205	0.5507	0.0555	0.4703	0.32	0.5881	0.2653	0.164	0.1122		0.7593	0.7752	1.0448	1.1543	1.3226	0.8219	0.9721	1.2542	0.6427
	2783			gulonic acid*	LC/MS polar	46957			9794176		1.33	1.12	0.84	1.17	0.47	0.4	1.79	1.6	0.89		0.0158	0.0195	0.1733	0.0597	0.0846	0.0155	0.0822	0.1131	0.0071	0.0039	0.0061	0.0013	0.001	0.0107	0.0023	0.0093	0.1345	0.0992		1.0568	1.4065	1.1793	0.1173	0.1376	0.0552	0.6986	1.2502	1.1145
	2784		Tocopherol Metabolism	alpha-tocopherol	LC/MS pos late	1561	C02477	HMDB01893	14985		1.54	1.79	1.16	1.09	1.18	1.08	0.41	0.27	0.66		0.1984	0.1013	0.2173	0.0696	0.8356	0.0944	0.849	0.373	0.3192	0.0859	0.6271	0.062	0.0009	0.0102	0.0002	0.0021	0.0459	0.0562		0.5487	0.8475	0.9797	1.3243	1.4468	1.5624	1.871	0.7629	0.507
	2800		Biotin Metabolism	biotin	LC/MS pos early	568	C00120	HMDB00030	171548		1.12	1.45	1.3	1.52	1.2	0.79	1	1	1		0.6114	0.2174	0.0841	0.0333	0.1504	0.024	0.0055	0.0271	0.106	0.0339	0.0303	0.0046	---	---	---	---	---	---		2.3776	2.6555	3.4435	0.2017	0.3074	0.2429	0.1667	0.1667	0.1667
	2804		Folate Metabolism	5-methyltetrahydrofolate (5MeTHF)	LC/MS neg	18330	C00440	HMDB01396	146		0.66	0.05	0.08	1.12	0.31	0.28	0.91	0.61	0.66		0.0911	0.0579	1.238e-07	7.3343e-06	0.0004	0.0003	0.3017	0.2232	0.0008	0.0011	0.0002	0.0002	0.5854	0.3599	0.031	0.0362	0.0434	0.0555		0.7538	0.4963	0.0404	1.11	1.2418	0.3435	1.9706	1.7969	1.1936
	2809		Pterin Metabolism	pterin	LC/MS pos early	43023	C00715	HMDB00802	73000		1.18	3.09	2.62	0.73	1.01	1.39	0.78	0.59	0.76		0.4818	0.1913	0.0003	0.0004	0.0036	0.0013	0.0556	0.0937	0.829	0.1966	0.0522	0.0072	0.1598	0.158	0.0255	0.0327	0.1735	0.1143		0.7978	0.9415	2.4663	1.1921	0.8662	1.2019	1.1221	0.8761	0.6616
	2813		Hemoglobin and Porphyrin Metabolism	5-aminolevulinate	LC/MS pos early	2290	C00430	HMDB01149	137		0.68	0.83	1.21	1.36	0.67	0.49	1.29	1.46	1.13		0.085	0.0553	0.4114	0.1139	0.5392	0.0664	0.1435	0.1479	0.0754	0.025	0.0077	0.0015	0.4363	0.3067	0.1108	0.0843	0.5138	0.2288		1.5026	1.0229	1.2401	0.7891	1.0738	0.5253	0.7538	0.9753	1.1019
	2820			bilirubin (Z,Z)	LC/MS pos late	43807	C00486	HMDB00054	5280352		1.14	1	0.88	1.2	0.54	0.45	1.79	2.55	1.42		0.391	0.1668	---	---	0.391	0.0509	0.592	0.3094	0.187	0.0555	0.065	0.0088	0.0571	0.0838	0.0159	0.0248	0.006	0.0238		0.3278	0.3743	0.3278	0.6074	0.7281	0.3278	0.6615	1.1854	1.6859
	2831		Thiamine Metabolism	thiamin (Vitamin B1)	LC/MS pos early	5341	C00378	HMDB00235	1130		1.13	2.69	2.37	0.99	2.25	2.28	1.26	0.97	0.77		0.2523	0.1198	4.6774e-05	0.0001	0.0002	0.0002	0.8434	0.3713	2.0037e-05	0.0002	2.4667e-05	7.1755e-05	0.0105	0.0334	0.6469	0.2855	0.0058	0.0238		0.8706	0.9863	2.3393	1.0205	1.0077	2.297	0.8273	1.0451	0.8006
	2832			thiamin monophosphate	LC/MS pos early	15798	C01081	HMDB02666	3382778		1.33	2.44	1.84	1.02	1.56	1.52	0.95	0.77	0.81		0.0645	0.0465	0.0004	0.0005	0.0048	0.0016	0.764	0.3487	0.0217	0.0091	0.0001	0.0002	0.616	0.3715	0.0455	0.0463	0.0457	0.0562		0.7484	0.9918	1.8267	0.2917	0.2981	0.4538	1.8129	1.7238	1.404
	2833			thiamin diphosphate	LC/MS neg	35670	C00068	HMDB01372	1132		0.83	0.95	1.14	0.88	0.82	0.93	1.24	0.81	0.66		0.2999	0.1355	0.7514	0.1799	0.3861	0.0506	0.3196	0.2292	0.0728	0.0243	0.5899	0.0589	0.1566	0.157	0.1831	0.119	0.0256	0.0422		0.7311	0.6096	0.6952	1.2885	1.1353	1.0535	1.1038	1.3659	0.8992
	2838		Vitamin A Metabolism	retinol (Vitamin A)	LC/MS pos late	1806	C00473	HMDB00305	445354		0.93	0.84	0.91	1.1	0.78	0.71	0.81	0.55	0.67		0.5442	0.2049	0.0995	0.0388	0.4892	0.061	0.1408	0.1479	0.1032	0.0332	0.0476	0.0067	0.1186	0.1309	0.0108	0.0207	0.0472	0.0563		1.3748	1.2792	1.1609	0.9694	1.0686	0.755	0.7058	0.5746	0.3848
	2843		Vitamin B6 Metabolism	pyridoxine (Vitamin B6)	LC/MS pos early	608	C00314	HMDB02075	1054		3.04	7.25	2.38	1.53	7.25	4.74	1.28	1	0.78		0.0166	0.0195	4.572e-05	0.0001	0.0278	0.0066	0.1714	0.1642	7.5252e-05	0.0004	0.0012	0.0004	0.391	0.2802	---	---	0.391	0.1895		0.64	1.9484	4.6408	0.5167	0.7905	3.7437	0.1709	0.2188	0.1709
	2844			pyridoxamine	LC/MS pos early	2150	C00534	HMDB01431	1052		1.68	3.24	1.93	0.75	2.38	3.16	1.09	1.18	1.08		0.037	0.0336	3.3295e-06	3.8966e-05	0.0137	0.0037	0.0062	0.0292	0.001	0.0012	0.0006	0.0003	0.4336	0.3056	0.5018	0.2364	0.8073	0.3068		0.6746	1.1348	2.1856	1.1093	0.834	2.6367	0.8683	0.9436	1.0229
	2845			pyridoxamine phosphate	LC/MS pos early	3138	C00647	HMDB01555	1053		0.68	1.29	1.89	0.72	1.16	1.62	1.27	0.87	0.68		0.0086	0.0133	0.0356	0.0168	0.0003	0.0003	0.0293	0.0613	0.1823	0.0544	0.0029	0.0008	0.0587	0.0841	0.243	0.1479	0.0012	0.0141		0.8893	0.6051	1.1464	0.871	0.6229	1.0107	1.293	1.6454	1.124
	2846			pyridoxal phosphate	LC/MS pos early	5331	C00018	HMDB01491	1051		0.69	0.93	1.36	1.24	0.85	0.68	1.19	1.05	0.88		0.0374	0.0336	0.5969	0.1527	0.0462	0.0096	0.1015	0.1291	0.2631	0.0735	0.0055	0.0012	0.2025	0.1847	0.6714	0.2931	0.277	0.1529		1.1417	0.783	1.0614	0.6928	0.8616	0.5893	2.6816	3.1874	2.8068
	2847			pyridoxal	LC/MS pos early	1651	C00250	HMDB01545	1050		1.27	2.43	1.91	0.83	1.56	1.87	1.42	1.48	1.04		0.2387	0.114	3.3962e-05	0.0001	0.0155	0.0041	0.0124	0.0405	0.0044	0.0027	0.0006	0.0003	0.0013	0.0112	0.0494	0.049	0.8646	0.3189		0.8271	1.051	2.0081	1.3513	1.1262	2.1054	0.581	0.8254	0.8624
	2848			pyridoxate	LC/MS neg	31555	C00847	HMDB00017	6723		0.87	0.99	1.13	1.98	2.02	1.02	1.59	2.58	1.62		0.7201	0.2448	0.7563	0.1807	0.5044	0.0626	0.5365	0.2966	0.3239	0.0869	0.7602	0.0736	0.2969	0.2371	0.179	0.1176	0.6197	0.261		1.4665	1.2813	1.4484	1.2515	2.4806	2.5342	0.7888	1.2571	2.033
	2850	Xenobiotics	Benzoate Metabolism	hippurate	LC/MS neg	15753	C01586	HMDB00714	464		1.46	3.7	2.53	1.07	2	1.86	2.21	1.99	0.9		0.0213	0.0229	5.59e-05	0.0001	0.0001	0.0002	0.4673	0.2762	0.0003	0.0008	0.0004	0.0003	0.0015	0.0112	0.0035	0.0111	0.3255	0.1706		0.9314	1.3614	3.4476	0.99	1.0638	1.9834	0.0784	0.1735	0.1559
	2881			O-methylcatechol sulfate	LC/MS neg	46111			22473		0.54	0.8	1.48	0.68	0.47	0.7	0.75	0.61	0.82		0.0061	0.0115	0.1348	0.0488	0.0011	0.0006	0.0116	0.04	0.0005	0.0009	0.0073	0.0015	0.0456	0.0732	0.0062	0.015	0.0246	0.0418		1.1105	0.6005	0.8876	1.2139	0.824	0.5755	2.1144	1.5807	1.2901
	2940		Food Component/Plant	2-piperidinone	LC/MS pos early	43400			12665		1.2	1.83	1.52	0.74	0.83	1.13	0.85	0.71	0.84		0.4164	0.1748	0.1196	0.0453	0.2698	0.0377	0.315	0.2276	0.5028	0.1258	0.7908	0.0763	0.3631	0.2686	0.0395	0.0433	0.4171	0.1985		0.3601	0.4336	0.659	0.686	0.5056	0.5723	1.8899	1.6076	1.3475
	3054			gluconate	LC/MS polar	587	C00257	HMDB00625	10690		3.58	3.8	1.06	1.32	6.72	5.1	2.98	3.24	1.09		0.0008	0.005	0.0009	0.001	0.5508	0.0674	0.137	0.1479	3.4956e-05	0.0003	0.0001	0.0002	0.0012	0.0112	0.0018	0.0076	0.4617	0.2128		0.8316	2.9793	3.1617	0.3063	0.4036	2.0588	0.3494	1.0422	1.1323
	3075			beta-guanidinopropanoate	LC/MS pos early	35101	C03065	HMDB13222	67701		0.53	1.22	2.29	1.16	0.79	0.68	0.95	1.05	1.11		0.0057	0.0113	0.0597	0.025	0.0038	0.0014	0.2951	0.2198	0.0263	0.0106	0.0302	0.0046	0.7352	0.406	0.8645	0.3483	0.657	0.2689		1.0379	0.5527	1.2633	1.9257	2.2418	1.5278	0.3503	0.3315	0.3672
	3121			ergothioneine	LC/MS pos early	37459	C05570	HMDB03045	3032311		0.46	1.65	3.62	0.84	0.88	1.05	0.52	0.42	0.8		0.0009	0.005	0.0036	0.0028	6.7314e-05	0.0001	0.0481	0.085	0.1369	0.0423	0.5142	0.0524	0.0014	0.0112	0.0009	0.0055	0.0048	0.0238		0.653	0.2973	1.0773	4.2391	3.5573	3.7181	1.4652	0.766	0.6094
	3123			erythritol	LC/MS polar	20699	C00503	HMDB02994	222285		0.71	1.02	1.43	1.19	0.96	0.8	1.47	1.27	0.86		0.011	0.0155	0.7868	0.1866	0.0012	0.0006	0.1379	0.1479	0.6915	0.1677	0.1433	0.0176	0.0063	0.0253	0.0436	0.0453	0.0468	0.0563		0.934	0.6635	0.9515	1.028	1.2271	0.987	0.8062	1.1885	1.0251
	3177			N-glycolylneuraminate	LC/MS pos early	37123	C03410	HMDB00833	123802		1.04	1.2	1.15	1.02	0.99	0.97	1.16	0.87	0.75		0.683	0.2356	0.131	0.0482	0.116	0.0199	0.7364	0.3429	0.87	0.2039	0.3543	0.0382	0.3158	0.2455	0.2862	0.1639	0.0552	0.0607		1.5081	1.5672	1.8045	0.9912	1.0065	0.9785	0.7197	0.8329	0.6269
	3229			stachydrine	LC/MS pos early	34384	C10172	HMDB04827	115244		0.68	1.27	1.87	0.92	0.72	0.78	1.34	0.98	0.73		0.0085	0.0133	0.0404	0.0185	0.0004	0.0003	0.428	0.2622	0.0264	0.0106	0.0402	0.0058	0.0075	0.0281	0.7658	0.3197	0.0021	0.0178		1.1037	0.7501	1.4039	1.5858	1.4554	1.1378	0.4383	0.5854	0.4277
	3636		Chemical	sulfate*	LC/MS polar	46960	C00059	HMDB01448	1118		1.1	0.71	0.64	1.11	0.86	0.77	0.82	0.6	0.74		0.4604	0.186	0.0466	0.0207	0.0042	0.0015	0.6362	0.3203	0.223	0.0645	0.2155	0.0249	0.1724	0.166	0.0032	0.0105	0.0926	0.0819		1.2379	1.3635	0.877	0.3627	0.4034	0.3109	1.7429	1.4216	1.0497
	3639			O-sulfo-L-tyrosine	LC/MS neg	45413			514186		1.29	0.47	0.36	0.87	0.6	0.68	1.08	0.77	0.71		0.016	0.0195	4.097e-05	0.0001	9.6685e-06	3.8099e-05	0.3495	0.2357	0.0091	0.0046	0.0188	0.0032	0.1022	0.1196	0.0257	0.0327	0.0097	0.0293		1.6453	2.1166	0.7702	1.384	1.2102	0.8273	0.9578	1.0371	0.7376
	3656			2-aminophenol sulfate	LC/MS neg	43266		HMDB61116	181670		0.78	1.08	1.39	0.87	0.98	1.12	1.41	1.55	1.1		0.1888	0.097	0.6666	0.1659	0.0885	0.0161	0.391	0.2516	0.9842	0.224	0.1887	0.0224	0.1245	0.1345	0.0899	0.0737	0.6037	0.256		0.7364	0.5723	0.7951	0.6544	0.5723	0.6434	0.833	1.1757	1.2938
	3699			dimethyl sulfone	LC/MS pos early	43424	C11142	HMDB04983	6213		1.14	1.78	1.57	0.76	0.87	1.15	1.81	1.94	1.07		0.5882	0.2131	0.1599	0.0556	0.2684	0.0377	0.6828	0.3324	0.8627	0.203	0.7977	0.0767	0.1864	0.173	0.0428	0.0448	0.7035	0.2805		0.5924	0.6736	1.0557	0.9039	0.6845	0.7856	0.4315	0.782	0.839
	3709			HEPES	LC/MS neg	21248			23831		1	1	1	1	1	1	1.06	0.84	0.79		---	---	---	---	---	---	---	---	---	---	---	---	0.5628	0.3545	0.1448	0.1009	0.0193	0.0363		0.8182	0.8182	0.8182	0.8182	0.8182	0.8182	1.0749	1.1382	0.9038
	3712			lanthionine	LC/MS pos early	42002			6994972;98504		0.55	1.08	1.95	1.36	1	0.74	1	1	1		0.221	0.1083	0.7366	0.1779	0.1908	0.0291	0.4135	0.2606	0.9611	0.2205	0.4185	0.0434	---	---	---	---	---	---		1.7144	0.9494	1.8526	0.1197	0.1625	0.1198	0.1053	0.1053	0.1053
	3726			phenol red	LC/MS neg	36817	C12600		4766		0.98	1.97	2.01	1.27	1.86	1.46	1.5	1.02	0.68		0.831	0.2653	0.0025	0.0021	0.0028	0.0011	0.0849	0.1162	0.0053	0.003	0.0308	0.0046	0.0137	0.0356	0.723	0.3063	0.0132	0.0308		0.6165	0.6018	1.2119	0.5368	0.6828	0.9966	1.4592	2.1918	1.4952
	3728			benzoylcarnitine*	LC/MS pos early	43265					0.35	2.14	6.06	0.81	1.19	1.47	1.57	0.88	0.56		0.0022	0.0067	0.0028	0.0023	0.0005	0.0004	0.0593	0.0969	0.1811	0.0543	0.0172	0.0029	0.0111	0.0338	0.4633	0.2228	0.0423	0.0552		0.8548	0.3024	1.8323	2.1375	1.739	2.5522	0.5003	0.7878	0.4389
	3743			thiosulfate	LC/MS neg	40086	C05529		1084		0.13	0.41	3.2	1	1	1	0.93	0.74	0.79		0.0068	0.012	0.0045	0.0032	0.0334	0.0076	---	---	---	---	---	---	0.5308	0.3446	0.0095	0.0198	0.1665	0.1122		0.9374	0.121	0.3872	0.0532	0.0532	0.0532	1.4788	1.3736	1.0915
	3744			N-methylpipecolate	LC/MS pos early	47101			11862129;11286529		0.62	0.96	1.55	0.85	0.67	0.79	0.9	0.72	0.79		0.0123	0.0166	0.5616	0.1443	0.0178	0.0047	0.0512	0.0876	0.0013	0.0013	0.0122	0.0022	0.3937	0.2814	0.0259	0.0327	0.1523	0.1071		1.0289	0.6394	0.9893	1.6746	1.4176	1.1146	0.9702	0.8775	0.6962
[truncated: 15 more columns]
